# Supplementary material for: Brønsted acid-mediated mono- and di-substitution of quinoxalines with indoles: a pathway to indolocarbazole-quinoxaline scaffolds
Source: Royal Society of Chemistry journal article supplement (doi:10.1039/d4cc06606e), 2025-01-01
Supplement: d4cc06606e1.pdf [file d4cc06606e1.pdf]

## Electronic Supporting Information

### *Brønsted Acid Mediated Mono- and Di-substitution of Quinoxalines with Indoles: A Pathway to Indolocarbazole-Quinoxaline Scaffolds*

Mangesh Biramya Valvi,<sup>a</sup> Gaurav Badhani,<sup>a</sup> Karan Prakash More,<sup>a</sup> and Subbarayappa Adimurthy\*<sup>a</sup>

<sup>a</sup>Academy of Scientific & Innovative Research (AcSIR), Ghaziabad, 201002, India; CSIR Central Salt & Marine Chemicals Research Institute, G. B. Marg, Bhavnagar-364 002. Gujarat, INDIA. Fax: 91-278-2567562; E-mail: [adimurthy@csmcri.res.in](mailto:adimurthy@csmcri.res.in)

## **Table of content**

|                                                                                                    |      |
|----------------------------------------------------------------------------------------------------|------|
| 1. General information.....                                                                        | S3   |
| 2. Optimization of reaction conditions.....                                                        | S4   |
| 3. Experimental procedure.....                                                                     | S10  |
| 4. Spectroscopic data.....                                                                         | S13  |
| 5. Mechanistic studies.....                                                                        | S38  |
| 6. X-ray Structure and Data.....                                                                   | S41  |
| 7. <sup>1</sup> H NMR, <sup>13</sup> C NMR and <sup>19</sup> F spectra for spectroscopic data..... | S44  |
| 8. References and notes.....                                                                       | S101 |

## 1. General Information:

All reactions were performed in an oven-dried glassware using a clean seal reaction tube,  $^1\text{H}$ , and  $^{13}\text{C}$  were recorded on a JEOL, RESONANCE ECZ600R (500 MHz, 600MHz) and BRUKER AVANCE III HD (200MHz), and Chemical shifts ( $\delta$ ) are reported in ppm, coupling constants (J) were given in Hz. using the residual solvent peak in  $\text{CDCl}_3$  (H:  $\delta = 7.26$  and C:  $\delta = 77.16$  ppm), DMSO- $d_6$  (H:  $\delta = 2.50$ , and 3.33 ppm and C:  $\delta = 49.25$  ppm) and Tetramethyl silane (TMS) (for  $^1\text{H}$ ,  $\delta = 0$ ), as the internal standard. IR spectra were recorded on a Perkin Elmer, G-FTIR. HRMS ESI ( $m/z$ ) were recorded on a LC Waters, MS Micromass. X-ray diffraction data were recorded on a Bruker Kappa Apex-II CCD diffractometer at 296 K. Melting points of solid compounds were measured by a Thermo Scientific MEL TEMP instrument. the reaction was carried inside a wooden box. Progress of the reactions was monitored by thin-layer chromatography (TLC). All products were purified through column chromatography using silica gel 100–200 mesh size using hexane/ethyl acetate as an eluent, unless otherwise indicated.

All chemical reagents, substrates, and catalysts were purchased from commercial suppliers (like TCI, Sigma Aldrich, Spectrochem, BLD Pharma etc.), and were used without further purification. The starting substrates **1bb**, **1bc**, **1bd**, **1ae**, **1af**, and **1ag** were prepared according to the literature procedure<sup>1,2</sup>.

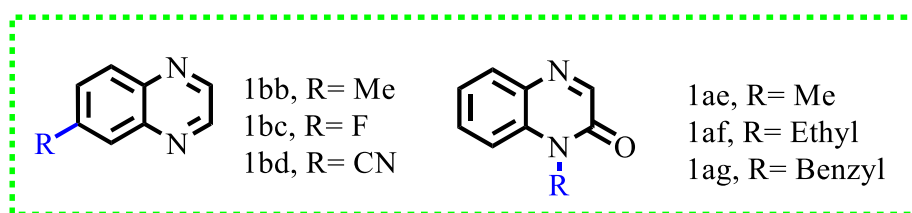

## 2. Optimization of reaction conditions for mono-substitution of quinoxaline and indole:

Table S1: Screening of Acid

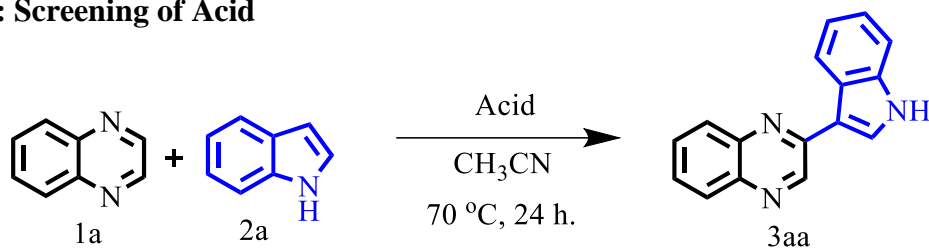

| Entry | Variations of Acid (equiv.)               | Yield (%) <sup>a</sup> |
|-------|-------------------------------------------|------------------------|
| 1     | H <sub>2</sub> SO <sub>4</sub> (1.2)      | 42                     |
| 2     | Et <sub>2</sub> O(BF <sub>3</sub> ) (1.2) | trace                  |
| 3     | FeCl <sub>3</sub> (1.2)                   | trace                  |
| 4     | p-TSA (1.2)                               | 47                     |
| 5     | HBr (1.2)                                 | 53                     |
| 6     | <b>HCl (1.2)</b>                          | <b>65</b>              |
| 7     | CH <sub>3</sub> COOH (1.2)                | nr                     |
| 8     | HCl (0.3)                                 | 36                     |
| 9     | HCl (0.5)                                 | 40                     |
| 10    | HCl (1.0)                                 | 39                     |
| 11    | HCl (1.5)                                 | 47                     |
| 12    | HCl (2.0)                                 | 48                     |

<sup>a</sup> Reaction Condition: 0.3 mmol of **1a** (1.0 equiv), 0.3 mmol of **2a** (1.0 equiv), Acid in Acetonitrile (1mL) at 70 °C for 24 h, isolated yield.

Table S2: Screening of Solvent

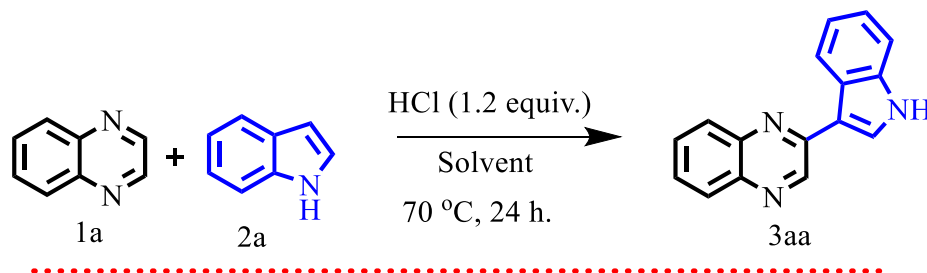

| Entry | Variations of Solvent (1mL) | Yield (%) <sup>a</sup> |
|-------|-----------------------------|------------------------|
| 1     | DMF                         | 24                     |
| 2     | DCE                         | nr                     |
| 3     | CH <sub>3</sub> CN          | <b>65</b>              |
| 4     | Toluene                     | nr                     |
| 5     | 1,4 Dioxane                 | 10                     |
| 6     | Ethyl Acetate               | nr                     |
| 7     | Methanol                    | 15                     |
| 8     | Acetone                     | nr                     |

<sup>a</sup>Reaction Condition: 0.3 mmol of **1a** (1.0 equiv.), 0.3 mmol of **2a** (1.0 equiv.), Hydrochloric acid (1.2 equiv.) in Solvent at 70 °C for 24 h, isolated yield.

**Table S3: Screening of Temp. and Time**

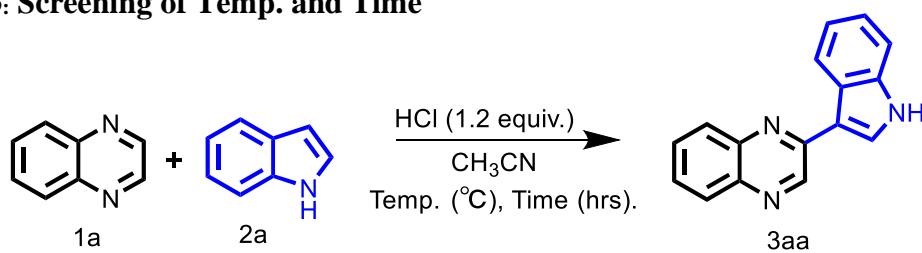

| Entry | Temp. (°C) | Time (h)  | Yield (%) <sup>a</sup> |
|-------|------------|-----------|------------------------|
| 1     | 00         | 24        | trace                  |
| 2     | rt         | 24        | 49                     |
| 3     | 50         | 24        | 50                     |
| 4     | <b>70</b>  | <b>24</b> | <b>65</b>              |
| 5     | 100        | 24        | 59                     |
| 6     | 120        | 24        | 57                     |
| 7     | 70         | 12        | 45                     |
| 8     | 70         | 35        | 50                     |
| 9     | 80         | 24        | 64                     |

<sup>a</sup>Reaction Condition: 0.3 mmol of **1a** (1.0 equiv.), 0.3 mmol of **2a** (1.0 equiv.), and Hydrochloric acid (1.2 equiv.) in the acetonitrile (1mL) temp. and time, isolated yield.

## 2a. Optimization of reaction conditions for di-substitution of quinoxaline and indole:

**Table S4: Screening of Acid**

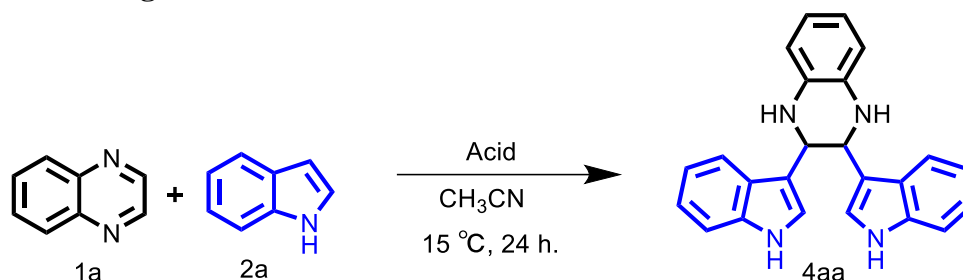

| Entry | Acid (equiv.)                             | Yield <sup>a</sup> |
|-------|-------------------------------------------|--------------------|
| 1     | HBr (2.0)                                 | 30                 |
| 2     | H <sub>2</sub> SO <sub>4</sub> (2.0)      | 53                 |
| 3     | CH <sub>3</sub> COOH (2.0)                | nr                 |
| 4     | Et <sub>2</sub> O(BF <sub>3</sub> ) (2.0) | nr                 |
| 5     | FeCl <sub>3</sub> (2.0)                   | nr                 |
| 6     | <b>HCl (2.0)</b>                          | <b>66</b>          |
| 7     | HCl (1.2)                                 | 42                 |
| 8     | HCl (1.5)                                 | 48                 |
| 9     | HCl (3.0)                                 | 46                 |

<sup>a</sup>Reactions condition: 0.3 mmol of **1a** (1.0 equiv.), 0.6 mmol of **2a** (2.0 equiv.), and Acid in the acetonitrile (2mL) at 15 °C for 24 h, isolated yield.

**Table S5: Screening of Solvent**

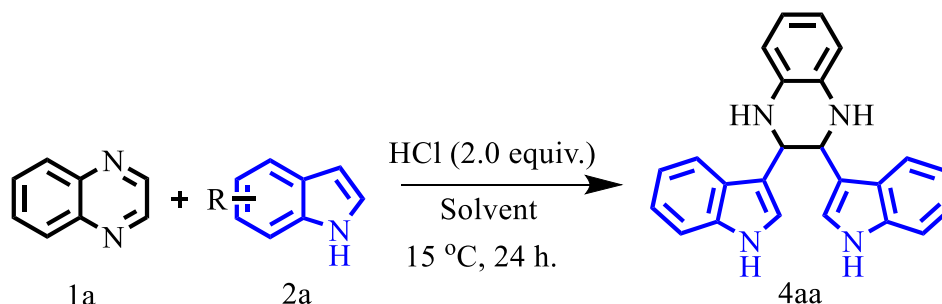

| Entry | Solvent (2mL)                 | Yield <sup>a</sup> |
|-------|-------------------------------|--------------------|
| 1     | THF                           | 35                 |
| 2     | CH <sub>3</sub> CN            | 66                 |
| 3     | THF: CH <sub>3</sub> CN (1:1) | 25                 |
| 4     | H <sub>2</sub> O              | nr                 |
| 5     | Acetone                       | nr                 |
| 6     | Toluene                       | nr                 |
| 7     | DCE                           | nr                 |

<sup>a</sup> Reactions condition: 0.3 mmol of **1a** (1.0 equiv.), 0.6 mmol of **2a** (2.0 equiv.), and Hydrochloric Acid (2.0 equiv.) in the solvent at 15 °C for 24 h, isolated yield.

**Table S6: Screening of Temp. and Time**

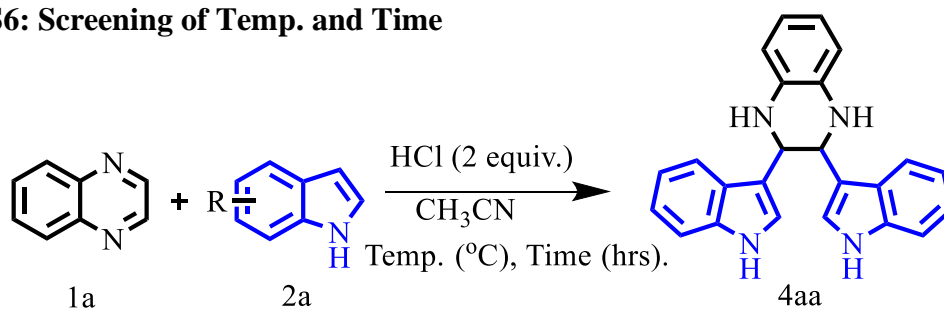

| Entry | Temp (°C) | Time (h) | Yield <sup>a</sup> |
|-------|-----------|----------|--------------------|
| 1     | -20       | 24       | 11                 |
| 2     | 00        | 24       | 47                 |
| 3     | 10        | 24       | 48                 |
| 4     | 15        | 24       | 66                 |
| 5     | 18        | 24       | 66                 |
| 6     | 20        | 24       | 41                 |
| 7     | rt        | 24       | 31                 |
| 8     | 50        | 24       | nr                 |
| 9     | 00        | 12       | 14                 |

|           |    |    |    |
|-----------|----|----|----|
| <b>10</b> | 18 | 48 | 70 |
| <b>11</b> | 15 | 36 | 67 |

<sup>a</sup> Reactions condition: 0.3 mmol of **1a** (1.0 equiv.), 0.6 mmol of **2a** (2.0 equiv.) and Hydrochloric Acid (2.0 equiv.) in Acetonitrile (2mL) at Temp. °C for Time h, Isolated yield

**Table S7: Optimization of reaction conditions for Indolocarbazole-quinoxalines:**

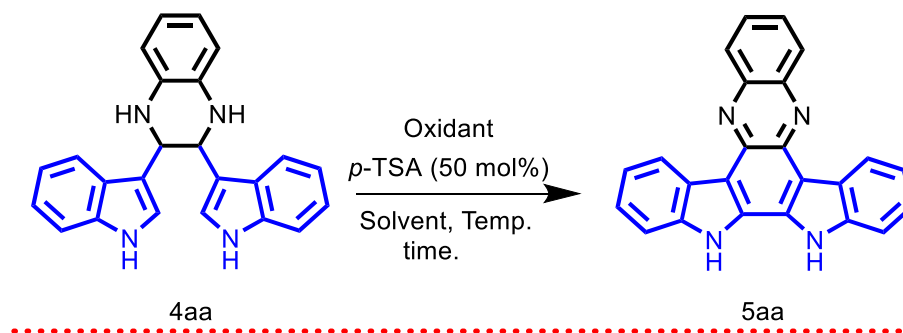

| Entry                | Oxidant<br>(2.0 equiv.) | Solvent<br>(1mL)   | Temp.<br>(°C) | Time<br>(h.) | Yield <sup>a</sup><br>(%) |
|----------------------|-------------------------|--------------------|---------------|--------------|---------------------------|
| <b>1</b>             | DDQ                     | Benzene            | 80            | 6            | 70                        |
| <b>2<sup>b</sup></b> | DDQ                     | Benzene            | 80            | 12           | 53                        |
| <b>3</b>             | DDQ (1.0 equiv.)        | Benzene            | 80            | 12           | 40                        |
| <b>4</b>             | DDQ                     | Benzene            | 80            | 4            | 47                        |
| <b>5</b>             | DDQ                     | Benzene            | 80            | 8            | 71                        |
| <b>6</b>             | <b>DDQ</b>              | <b>Benzene</b>     | <b>80</b>     | <b>12</b>    | <b>86</b>                 |
| <b>7</b>             | DDQ                     | Benzene            | 80            | 16           | 71                        |
| <b>8</b>             | DDQ                     | Benzene            | rt            | 12           | trace                     |
| <b>9</b>             | DDQ                     | Benzene            | 110           | 12           | 72                        |
| <b>10</b>            | DDQ                     | Toluene            | 80            | 12           | 65                        |
| <b>11</b>            | DDQ                     | DCE                | 80            | 12           | 40                        |
| <b>12</b>            | DDQ                     | CH <sub>3</sub> CN | 80            | 12           | nr                        |
| <b>13</b>            | DDQ                     | 1,4-Dioxane        | 80            | 12           | nr                        |
| <b>14</b>            | DDQ                     | Toluene            | 110           | 12           | 60                        |



|           |                |                           |     |    |       |
|-----------|----------------|---------------------------|-----|----|-------|
| <b>16</b> | DDQ            | Xylene                    | 80  | 12 | 38    |
| <b>17</b> | DDQ            | Benzene: H <sub>2</sub> O | 80  | 12 | 62    |
|           |                | (4:1)                     |     |    |       |
| <b>18</b> | DDQ            | Ethanol                   | 80  | 12 | trace |
| <b>19</b> | DDQ            | Trifluorobenzene          | 100 | 12 | 25    |
| <b>20</b> | I <sub>2</sub> | Benzene                   | 80  | 12 | trace |
| <b>21</b> | PIDA           | Benzene                   | 80  | 12 | trace |
| <b>22</b> | TBPB           | Benzene                   | 80  | 12 | nr    |
| <b>23</b> | DDQ            | o-DCB                     | 80  | 12 | 37    |
| <b>24</b> | DDQ            | Chlorobenzene             | 80  | 12 | 34    |

<sup>a</sup> Reaction condition: 0.1 mmol of **4aa**, 0.2 mmol of oxidative, and p-TSA (50 mol%) in 1 mL solvent. Isolated yield. <sup>b</sup> Reaction were performed without additive (p-TSA).

### 3. Experimental procedure:

#### 3a. General reaction procedure for the synthesis of 3aa-3bc

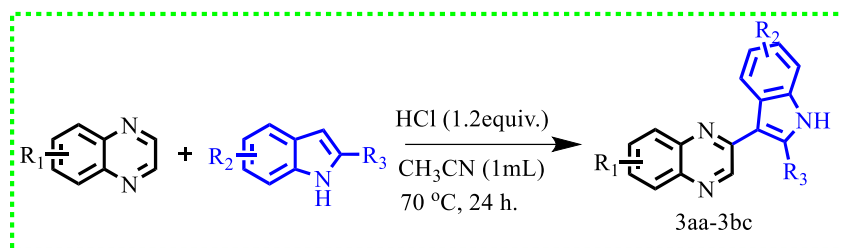

The reaction was performed 0.3 mmol quinoxaline (1.0 equiv.), and 0.3 mmol indole (1.0 equiv.), added into the clean oven dried reaction tube with cap, acetonitrile was used as a solvent, then 25.1  $\mu$ l of HCl (35%) (1.2 equiv.) was added dropwise at room temperature and the reaction mixture stirred in an oil bath at 70 °C up to 24 h. After cooling and quenching the reaction with water (10mL), the reaction mixture was extracted with ethyl acetate (10-15 mL three times) and the combined organic layer were dried over anhydrous Na<sub>2</sub>SO<sub>4</sub>. The organic solvent was removed under reduced pressure, the crude product leftover was purified by column chromatography using silica gel having 100-200 mesh size.

#### 3b. General reaction procedure for the synthesis of 3bd-3bk

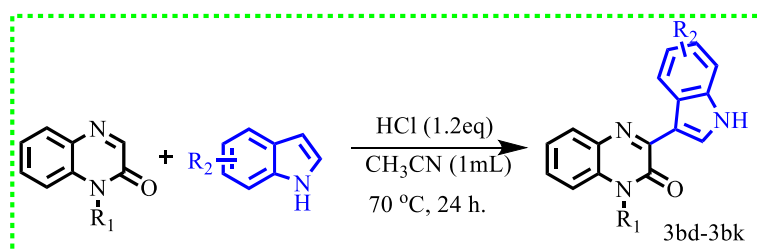

The reaction was performed 0.3 mmol quinoxalinone (1.0 equiv.), and 0.3 mmol indole (1.0 equiv.), added into the clean oven dried reaction tube with cap, acetonitrile was used as a solvent, then 25.1  $\mu$ l of HCl (35%) (1.2 equiv.) was added dropwise at room temperature and the reaction mixture stirred in an oil bath at 70 °C up to 24 h. After cooling and quenching the reaction with water (10mL), the reaction mixture was extracted with ethyl acetate (10-15 mL three times) and the combined organic layer were dried over anhydrous Na<sub>2</sub>SO<sub>4</sub>. The organic solvent was removed under reduced pressure, the crude product leftover was purified by column chromatography using silica gel having 100-200 mesh size.

### 3c. General reaction procedure for the synthesis of 4aa- 4aj

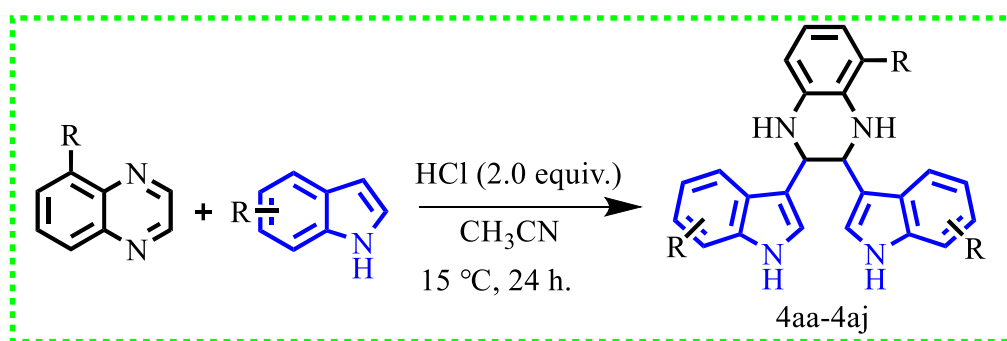

The reaction was performed with 0.3 mmol of quinoxaline (1.0 equiv.) and 0.6 mmol of indole (2.0 equiv.) was added in a clean reaction tube, with 2.0 mL of acetonitrile, the reaction mixture was cooled to 15 -18 °C, then 42  $\mu$ l of HCl (35%) (2.0 equiv. w.r.t. quinoxaline) was added dropwise into the reaction mixture, and the reaction mixture was stirred at same temperature for 24 h. After quenching with water (10mL), the reaction mixture was extracted with ethyl acetate (15 mL three times), and the combined organic layer was dried over anhydrous Na<sub>2</sub>SO<sub>4</sub>. After the removal of solvent under reduced pressure, the crude product leftover was purified by column chromatography using silica gel with 100-200 mesh size.

### 3d. General reaction procedure for the synthesis of 5aa-5ad

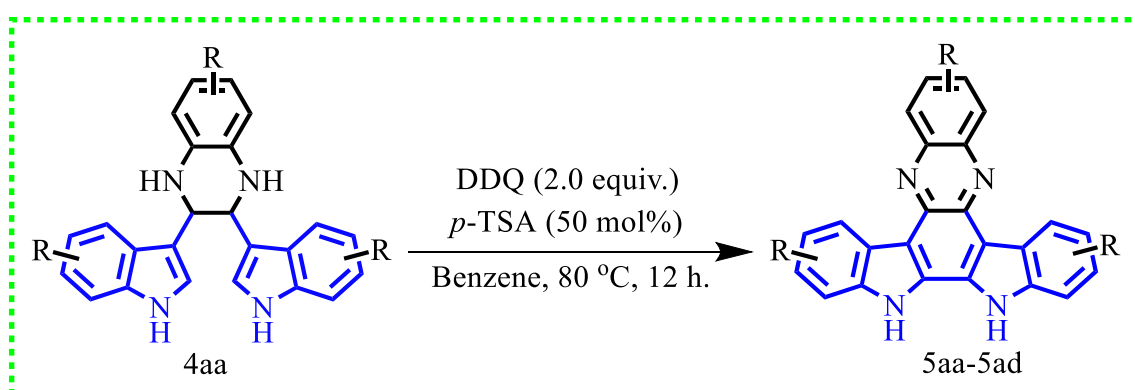

The reaction was performed with 0.1 mmol of **4aa** and 0.2 mmol DDQ (2.0 equiv.) and the catalytic amount 8.61 mg of *p*-TSA (50 mol %) were added in to a sealed tube containing 1.0 mL of benzene, then the reaction mixture was stirred at 80 °C for 12 h on carousel reactor. After cooling the reaction was quenched with water (10 mL), and reaction mixture was extracted with ethyl acetate (15 mL three times) and the combined organic layer was dried over anhydrous Na<sub>2</sub>SO<sub>4</sub>. After recovery of solvent under reduced pressure, the crude product leftover was purified by column chromatography using silica gel having 100-200 mesh size.

### 3e. Large-Scale-Reaction

#### Synthesis of 2-(1H-indol-3-yl) quinoxaline (3aa)

The reaction was performed at 1.30 g of **1a** (10 mmol) and 1.18 g of **2a** (10 mmol) added into the clean 100 mL round bottom flask, acetonitrile was used as a solvent (10 mL), then 840  $\mu$ l of HCl (35%) was added dropwise at room temperature and the reaction mixture was stirred in an oil bath at 70 °C up to 24 h. After cooling the reaction, it was quenched with water (40 mL), the reaction mixture was extracted with ethyl acetate (70 mL three times) and the combined organic layer was dried over anhydrous Na<sub>2</sub>SO<sub>4</sub>. Removal of the solvent under reduced pressure, the crude product leftover was purified by column chromatography (hexane: ethyl acetate= 7.5:2.5) using silica gel (100-200 mesh size) and the desired product was obtained (1.15 g) in 47% yield.

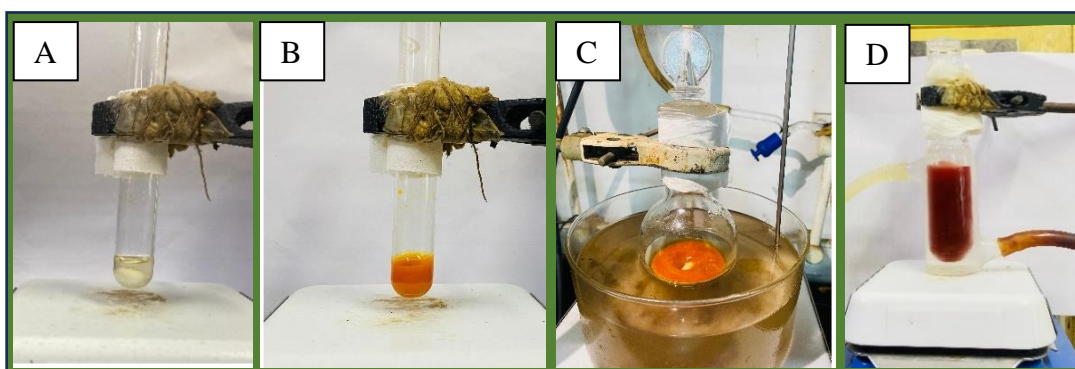

**Fig S1:** (A) Photograph of reaction mixture before addition of HCl (B) Photograph of reaction mixture after addition of HCl (C) Photograph of reaction setup at gram scale for 3aa (D) Photograph of reaction setup at gram scale for 4aa.

#### Synthesis of 2-(1H-indol-3-yl) quinoxaline (4aa)

The reaction was performed at 1.30 g (10 mmol) of **1a** and 2.34 g (20 mmol) of **2a** was added in to a 25 mL reaction tube containing 15 ml of acetonitrile, the reaction mixture was cooled to 15 -18 °C and then 1.40 mL of HCl (35%) (2.0 equiv., w.r.t. quinoxaline) was added dropwise into the reaction mixture. The reaction mixture was stirred at same temperature for 48 h in reaction tube, and the reaction was quenched with water (40 mL), and it was extracted with ethyl acetate (70 mL three times) and the combined organic layer was dried over anhydrous Na<sub>2</sub>SO<sub>4</sub>. After the recovery of the solvent under reduced pressure, the crude product leftover was purified by column chromatography (hexane: ethyl acetate= 7.0:3.0) using silica gel (having 100-200 mesh size). The desired product was obtained 49% yield (1.78 gm) (w.r.t. quinoxaline).

#### 4. Spectroscopic data:

##### Synthesis of 2-(1H-indol-3-yl) quinoxaline (3aa)

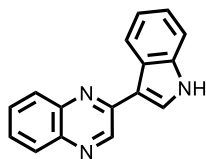

Prepared according to the general procedure (3a) mentioned above in 65% yield (47.8mg), eluent (25% EtOAc/hexane) to afford a yellow solid, mp= 184-186 °C.

**<sup>1</sup>H NMR (600 MHz, CDCl<sub>3</sub>)** δ 11.07 (s, 1H), 9.35 (s, 1H), 8.78 (d, *J* = 8.4 Hz, 1H), 8.56 (s, 1H), 8.19 (dd, *J* = 24.3, 8.4 Hz, 2H), 8.00 (d, *J* = 8.0 Hz, 1H), 7.93 – 7.90 (m, 1H), 7.87 (t, *J* = 7.5 Hz, 1H), 7.65 (t, *J* = 8.0 Hz, 1H), 7.17 (t, *J* = 7.7 Hz, 1H).

**<sup>13</sup>C NMR (151 MHz, CDCl<sub>3</sub>)** δ 195.8, 159.8, 149.6, 145.0, 143.1, 140.8, 140.4, 135.8, 135.2, 132.3, 131.2, 130.4, 129.5, 122.9, 122.0, 121.2.

**IR (cm<sup>-1</sup>):** ν<sub>max</sub>; 3173, 3015, 1617, 1550, 1121, 737.

**HRMS (ESI):** calcd for C<sub>16</sub>H<sub>11</sub>N<sub>3</sub> [M+H]<sup>+</sup>: 246.1031; found: 246.1032.

##### Synthesis of 3-(quinoxalin-2-yl)-1H-indol-4-ol (3ab)

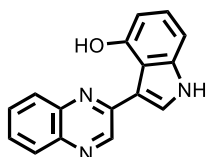

Prepared according to the general procedure (3a) mentioned above in 78% yield (61.1mg), eluent (25% EtOAc/hexane) to afford a yellow solid, mp= 270-272 °C.

**<sup>1</sup>H NMR (600 MHz, DMSO-*d*<sub>6</sub>)** δ 13.48 (s, 1H), 12.00 (s, 1H), 9.61 (s, 1H), 8.62 (d, *J* = 3.0 Hz, 1H), 8.00 (d, *J* = 8.1 Hz, 1H), 7.79 (dd, *J* = 5.0, 1.8 Hz, 2H), 7.67 (ddd, *J* = 8.1, 5.7, 2.6 Hz, 1H), 7.04 (t, *J* = 7.8 Hz, 1H), 6.86 (d, *J* = 8.0 Hz, 1H), 6.45 (d, *J* = 7.8 Hz, 1H).

**<sup>13</sup>C NMR (151 MHz, DMSO-*d*<sub>6</sub>)** δ 152.81, 149.3, 145.9, 140.1, 139.9, 139.1, 131.6, 130.2, 129.4, 128.7, 126.3, 125.8, 115.0, 114.1, 106.7, 103.4.

**IR (cm<sup>-1</sup>):** ν<sub>max</sub>; 3305, 3131, 3059, 1632, 1588, 1257, 1155, 1124, 897.

**HRMS (ESI):** calcd for C<sub>16</sub>H<sub>11</sub>N<sub>3</sub>O: 262.0980 [M+H]<sup>+</sup>; found: 262.0980

##### Synthesis of 2-(4-bromo-1H-indol-3-yl) quinoxaline (3ac)

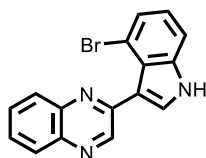

Prepared according to the general procedure (3a) mentioned above in 42% yield (40.8 mg), eluent (30% EtOAc/hexane) to afford a yellowish brown solid, mp= 216-218 °C.

**<sup>1</sup>H NMR (600 MHz, DMSO-*d*<sub>6</sub>)** δ 12.10 (s, 1H), 9.18 (s, 1H), 8.12 – 8.09 (m, 2H), 7.98 (d, *J* = 2.8 Hz, 1H), 7.87 – 7.81 (m, 2H), 7.60 (d, *J* = 8.1 Hz, 1H), 7.37 (d, *J* = 7.5 Hz, 1H), 7.16 (t, *J* = 7.8 Hz, 1H).

**<sup>13</sup>C NMR (151 MHz, DMSO-*d*<sub>6</sub>)** δ 150.3, 148.5, 141.9, 140.5, 138.3, 130.6, 130.3, 129.6, 129.3, 129.3, 125.1, 124.6, 123.6, 114.8, 113.3, 112.5.

**IR (cm<sup>-1</sup>):** ν<sub>max</sub>; 3139, 3029, 1617, 1530, 1238, 1104, 725, 608.

**HRMS (ESI):** calcd for C<sub>16</sub>H<sub>10</sub>BrN<sub>3</sub> [M+Na]<sup>+</sup>:345.9956; found:345.9951.

### Synthesis of 2-(5-methoxy-1H-indol-3-yl) quinoxaline (3ad)

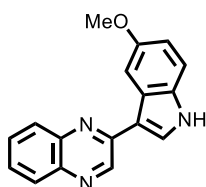

Prepared according to the general procedure (3a) mentioned above in 83% yield (68.5mg), eluent (25% EtOAc/hexane) to afford a yellow solid, mp= 192-194 °C.

**<sup>1</sup>H NMR (600 MHz, CDCl<sub>3</sub>)** δ 9.20 (s, 1H), 8.70 (s, 1H), 8.35 (d, *J* = 2.6 Hz, 1H), 8.12 (dd, *J* = 8.0, 1.6 Hz, 1H), 8.05 (dd, *J* = 8.5, 1.5 Hz, 1H), 7.95 (d, *J* = 2.9 Hz, 1H), 7.76 – 7.72 (m, 1H), 7.67 – 7.63 (m, 1H), 7.34 (d, *J* = 8.9 Hz, 1H), 6.99 (dd, *J* = 8.8, 2.5 Hz, 1H), 3.98 (s, 3H).

**<sup>13</sup>C NMR (151 MHz, CDCl<sub>3</sub>)** δ 155.6, 150.4, 143.6, 142.5, 140.1, 131.8, 129.8, 128.9, 128.0, 128.0, 126.2, 126.0, 114.6, 113.7, 112.0, 104.1, 55.7.

**IR (cm<sup>-1</sup>):** ν<sub>max</sub>; 3052, 1610, 1550, 1455, 1337, 1225, 1122, 737.

**HRMS (ESI):** calcd for C<sub>17</sub>H<sub>13</sub>N<sub>3</sub>O [M+Na]<sup>+</sup>:276.1137; found: 276.1118.

### Synthesis of 2-(5-methyl-1H-indol-3-yl) quinoxaline (3ae)

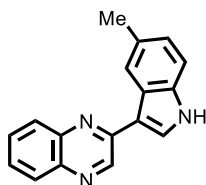

Prepared according to the general procedure (3a) mentioned above in 82% yield (63.7mg), eluent (25% EtOAc/hexane) to afford a yellow solid, mp=118-120 °C.

**<sup>1</sup>H NMR (600 MHz, CDCl<sub>3</sub>)** δ 9.23 (s, 1H), 8.56 (s, 1H), 8.53 (s, 1H), 8.16 (dd, *J* = 8.3, 1.4 Hz, 1H), 8.04 (dd, *J* = 8.4, 1.4 Hz, 1H), 7.96 (d, *J* = 2.7 Hz, 1H), 7.73 (t, *J* = 6.8 Hz, 1H), 7.67 – 7.63 (m, 1H), 7.35 (d, *J* = 8.2 Hz, 1H), 7.15 (dd, *J* = 8.5, 1.7 Hz, 1H), 2.55 (s, 3H).

**<sup>13</sup>C NMR (151 MHz, CDCl<sub>3</sub>)** δ 150.6, 144.0, 142.8, 140.3, 135.3, 131.3, 130.0, 129.1, 129.0, 128.1, 128.1, 125.9, 125.2, 121.9, 114.6, 111.2, 21.8.

**IR (cm<sup>-1</sup>):** ν<sub>max</sub>; 3122, 3023, 1612, 1548, 1439, 1234, 1138, 750.

**HRMS (ESI):** calcd for C<sub>17</sub>H<sub>13</sub>N<sub>3</sub> [M+H]<sup>+</sup>: 258.1031; found: 258.1043.

### Synthesis of 2-(5-chloro-1H-indol-3-yl) quinoxaline (3af)

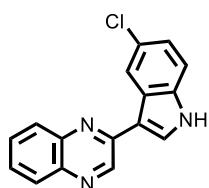

Prepared according to the general procedure (3a) mentioned above in 59% yield (49.5 mg), eluent (30% EtOAc/hexane) to afford a yellow solid, mp= 218-220 °C.

**<sup>1</sup>H NMR (600 MHz, DMSO-*d*<sub>6</sub>)** δ 12.10 (s, 1H), 9.50 (s, 1H), 8.81 (d, *J* = 2.2 Hz, 1H), 8.70 (d, *J* = 2.9 Hz, 1H), 8.11 (d, *J* = 8.2 Hz, 1H), 8.02 (d, *J* = 8.1 Hz, 1H), 7.81 (t, *J* = 7.7 Hz, 1H), 7.71 (t, *J* = 7.6 Hz, 1H), 7.55 (d, *J* = 8.6 Hz, 1H), 7.28 (d, *J* = 8.5 Hz, 1H).

**<sup>13</sup>C NMR (151 MHz, DMSO-*d*<sub>6</sub>)** δ 150.2, 144.2, 141.5, 139.3, 135.4, 130.2, 129.9, 128.6, 128.3, 127.8, 126.4, 125.3, 122.5, 121.2, 113.4, 112.3.

**IR (cm<sup>-1</sup>):** ν<sub>max</sub>; 3157, 3044, 1621, 1549, 1230, 1132, 741, 704.

The chemical compounds have been described.<sup>3</sup>

### Synthesis of 2-(5-bromo-1H-indol-3-yl) quinoxaline (3ag)

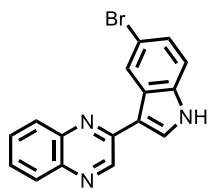

Prepared according to the general procedure (3a) mentioned above in 68% yield (72.0 mg), eluent (30% EtOAc/hexane) to afford a yellow solid, mp= 240-242 °C.

**<sup>1</sup>H NMR (600 MHz, DMSO-*d*<sub>6</sub>)** δ 12.13 (s, 1H), 9.52 (s, 1H), 8.98 (d, *J* = 2.2 Hz, 1H), 8.70 (d, *J* = 2.2 Hz, 1H), 8.11 (dd, *J* = 8.4, 1.3 Hz, 1H), 8.04 (dd, *J* = 8.2, 1.5 Hz, 1H), 7.83 – 7.80 (m, 1H), 7.73 – 7.70 (m, 1H), 7.53 (d, *J* = 8.6 Hz, 1H), 7.41 (dd, *J* = 8.6, 2.2 Hz, 1H).

**<sup>13</sup>C NMR (151 MHz, DMSO-*d*<sub>6</sub>)** δ 150.87, 144.93, 142.22, 140.08, 136.41, 130.77, 130.63, 129.29, 129.01, 128.52, 127.79, 125.78, 124.93, 114.60, 114.16, 112.99.

**IR (cm<sup>-1</sup>):** ν<sub>max</sub>; 3143, 3031, 1619, 1548, 1229, 1123, 744;

**HRMS (ESI):** calcd for C<sub>16</sub>H<sub>10</sub>BrN<sub>3</sub> [M+H]<sup>+</sup>:324.0136; found: 324.0129.

### Synthesis of 2-(5-nitro-1H-indol-3-yl) quinoxaline (3ah)

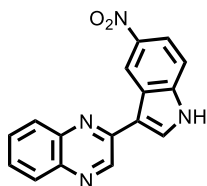

Prepared according to the general procedure (3a) mentioned above in 38% yield (33.1 mg), eluent (30% EtOAc/hexane) to afford a yellow solid, mp= 262-264 °C.

**<sup>1</sup>H NMR (600 MHz, DMSO-d<sub>6</sub>)** δ 12.47 (s, 1H), 9.63 (d, *J* = 2.4 Hz, 1H), 9.47 (s, 1H), 8.79 (d, *J* = 2.6 Hz, 1H), 8.08 (dd, *J* = 8.9, 2.4 Hz, 1H), 8.03 (d, *J* = 8.2 Hz, 1H), 7.98 (d, *J* = 8.1 Hz, 1H), 7.78 (s, 1H), 7.69 (t, *J* = 7.6 Hz, 1H), 7.64 (d, *J* = 8.9 Hz, 1H).

**<sup>13</sup>C NMR (151 MHz, DMSO-d<sub>6</sub>)** δ 150.2, 144.8, 142.6, 142.0, 140.7, 140.3, 132.7, 130.9, 129.3, 129.1, 129.0, 125.3, 119.6, 118.5, 115.2, 113.2.

**IR (cm<sup>-1</sup>):** ν<sub>max</sub>; 3160, 3060, 1618, 1579, 1548, 1240, 1140, 743.

**HRMS (ESI):** calcd for C<sub>16</sub>H<sub>10</sub>N<sub>3</sub>O<sub>2</sub> [M+Na]<sup>+</sup>; 313.0701; found: 313.0711

### Synthesis of 2-(6-methoxy-1H-indol-3-yl) quinoxaline (3ai)

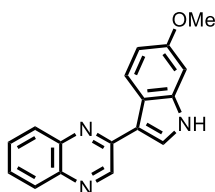

Prepared according to the general procedure (3a) mentioned above in 69% yield (66.9mg), eluent (25% EtOAc/hexane) to afford a yellow solid, mp= 190-192 °C.

**<sup>1</sup>H NMR (600 MHz, CDCl<sub>3</sub>)** δ 9.19 (s, 1H), 8.68 (d, *J* = 8.9 Hz, 1H), 8.61 (s, 1H), 8.13 (d, *J* = 8.5 Hz, 1H), 8.04 (d, *J* = 8.1 Hz, 1H), 7.87 (d, *J* = 2.7 Hz, 1H), 7.76 – 7.71 (m, 1H), 7.67 – 7.63 (m, 1H), 7.00 (dd, *J* = 8.8, 2.3 Hz, 1H), 6.91 (d, *J* = 2.3 Hz, 1H), 3.88 (s, 3H).

**<sup>13</sup>C NMR (151 MHz, CDCl<sub>3</sub>)** δ 157.3, 150.2, 143.7, 142.6, 140.1, 137.7, 129.8, 128.9, 128.8, 128.0, 124.4, 123.2, 119.8, 115.0, 111.4, 94.7, 55.5.

**IR (cm<sup>-1</sup>):** ν<sub>max</sub>;3181, 3068, 1628, 1550, 1453, 1250, 1151, 1125, 757.

**HRMS (ESI):** calcd for C<sub>17</sub>H<sub>13</sub>N<sub>3</sub>O [M+H]<sup>+</sup>:276.1137; found: 276.1122.

### Synthesis of 2-(6-fluoro-1H-indol-3-yl) quinoxaline (3aj)

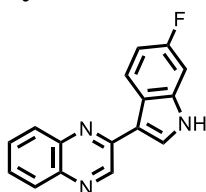



Prepared according to the general procedure (3a) mentioned above in 71% yield (56.1mg), eluent (25% EtOAc/hexane) to afford a yellow solid, mp= 216-218 °C.

**<sup>1</sup>H NMR (600 MHz, DMSO-*d*<sub>6</sub>)** δ 11.96 (s, 1H), 9.50 (s, 1H), 8.80 (dd, *J* = 8.8, 5.7 Hz, 1H), 8.63 (d, *J* = 3.0 Hz, 1H), 8.09 (d, *J* = 8.1 Hz, 1H), 8.02 (d, *J* = 8.1 Hz, 1H), 7.80 (t, *J* = 7.6 Hz, 1H), 7.70 (t, *J* = 7.7 Hz, 1H), 7.32 (dd, *J* = 9.8, 2.5 Hz, 1H), 7.13 – 7.08 (m, 1H).

**<sup>13</sup>C NMR (151 MHz, DMSO-*d*<sub>6</sub>)** δ 160.7, 159.1, 151.0, 144.9, 142.2, 140.0, 137.7, 130.6, 130.1, 129.2, 128.9, 128.4, 124.0, 124.0, 122.8, 113.5, 109.8, 109.6, 98.7, 98.5.

**<sup>19</sup>F NMR (471 MHz, DMSO-*d*<sub>6</sub>):** -119.89.

**IR (cm<sup>-1</sup>):** ν<sub>max</sub>; 3153, 3038, 1614, 1551, 1230, 1172, 11023, 755.

**HRMS (ESI):** calcd for C<sub>16</sub>H<sub>10</sub>FN<sub>3</sub> [M+H]<sup>+</sup>:264.0937; found: 264.0936.

### Synthesis of 2-(6-chloro-1H-indol-3-yl) quinoxaline (3ak)

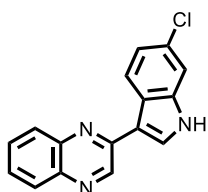

Prepared according to the general procedure (3a) mentioned above in 54% yield (45.3 mg), eluent (25% EtOAc/hexane) to afford a yellow solid, mp= 236-238 °C.

**<sup>1</sup>H NMR (600 MHz, DMSO-*d*<sub>6</sub>)** δ 12.02 (s, 1H), 9.50 (s, 1H), 8.79 (d, *J* = 8.5 Hz, 1H), 8.66 (d, *J* = 2.8 Hz, 1H), 8.09 (d, *J* = 8.0 Hz, 1H), 8.02 (d, *J* = 8.2 Hz, 1H), 7.81 (dd, *J* = 8.3, 6.7 Hz, 1H), 7.72 (d, *J* = 7.6 Hz, 1H), 7.58 (d, *J* = 2.0 Hz, 1H), 7.27 (dd, *J* = 8.4, 2.0 Hz, 1H).

**<sup>13</sup>C NMR (151 MHz, DMSO-*d*<sub>6</sub>)** δ 150.8, 144.9, 142.2, 140.0, 138.1, 130.6, 130.4, 129.2, 129.0, 128.5, 127.8, 124.8, 124.1, 121.7, 113.5, 112.2.

**IR (cm<sup>-1</sup>):** ν<sub>max</sub>; 3151, 3043, 1609, 1549, 1265, 1125, 753, 710.

**HRMS (ESI):** calcd for C<sub>16</sub>H<sub>10</sub>ClN<sub>3</sub> [M+Na]<sup>+</sup>:302.0461; found: 302.0458.

### Synthesis of 2-(7-fluoro-1H-indol-3-yl) quinoxaline (3al)

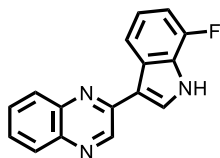

Prepared according to the general procedure (3a) mentioned above in 54% yield (42.6mg), eluent (25% EtOAc/hexane) to afford a yellow solid, mp= 236-238 °C.

**<sup>1</sup>H NMR (600 MHz, DMSO-*d*<sub>6</sub>)** δ 12.40 (s, 1H), 9.54 (s, 1H), 8.70 (d, *J* = 3.0 Hz, 1H), 8.62 (d, *J* = 8.0 Hz, 1H), 8.10 (d, *J* = 8.2 Hz, 1H), 8.02 (d, *J* = 8.2 Hz, 1H), 7.81 (t, *J* = 7.6 Hz, 1H), 7.72 (d, *J* = 7.7 Hz, 1H), 7.22 (td, *J* = 7.9, 4.8 Hz, 1H), 7.11 (dd, *J* = 11.4, 7.7 Hz, 1H).

**<sup>13</sup>C NMR (151 MHz, DMSO-d<sub>6</sub>)** δ 161.3, 161.1, 159.5, 154.8, 153.0, 151.0, 140.5, 140.4, 139.7, 139.5, 139.1, 138.9, 138.6, 132.0, 132.0, 129.6, 125.6, 118.3, 118.2.

**<sup>19</sup>F NMR (471 MHz, DMSO-d<sub>6</sub>)**: -132.97.

**IR (cm<sup>-1</sup>)**: ν<sub>max</sub>; 3058, 3021, 1639, 1547, 1227, 1181, 1130, 757.

**HRMS**: (ESI) calcd for C<sub>16</sub>H<sub>10</sub>FN<sub>3</sub> [M+H]<sup>+</sup>:264.0937; found: 264.0939.

### Synthesis of 2-(7-chloro-1H-indol-3-yl) quinoxaline (3am)

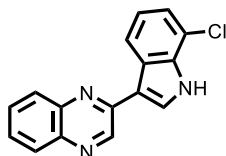

Prepared according to the general procedure (3a) mentioned above in 40% yield (33.5 mg), eluent (25% EtOAc/hexane) to afford a yellow solid, mp= 270-272 °C.

**<sup>1</sup>H NMR (600 MHz, DMSO-d<sub>6</sub>)** δ 12.26 (s, 1H), 9.56 (s, 1H), 8.79 (d, *J* = 7.9 Hz, 1H), 8.71 (d, *J* = 2.9 Hz, 1H), 8.11 (d, *J* = 8.2 Hz, 1H), 8.03 (d, *J* = 8.5 Hz, 1H), 7.81 (t, *J* = 7.5 Hz, 1H), 7.72 (t, *J* = 7.7 Hz, 1H), 7.35 (d, *J* = 7.5 Hz, 1H), 7.26 (t, *J* = 7.8 Hz, 1H).

**<sup>13</sup>C NMR (151 MHz, DMSO-d<sub>6</sub>)** δ 150.8, 145.1, 142.2, 140.1, 134.5, 130.6, 130.5, 129.3, 129.0, 128.6, 128.0, 122.7, 122.4, 121.9, 116.8, 114.5.

**IR (cm<sup>-1</sup>)**: ν<sub>max</sub>; 3166, 3061, 1621, 1563, 1260, 1118, 748, 702.

**HRMS (ESI)**: calcd for C<sub>16</sub>H<sub>10</sub>ClN<sub>3</sub> [M+H]<sup>+</sup>:280.0642; found: 280.0635.

### Synthesis of 2-(7-bromo-1H-indol-3-yl) quinoxaline (3an)

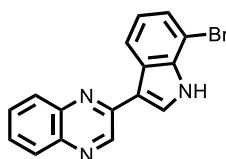

Prepared according to the general procedure (3a) mentioned above in 50% yield (48.6mg), eluent (25% EtOAc/hexane) to afford a yellow solid, mp= 260-262 °C.

**<sup>1</sup>H NMR (600 MHz, DMSO-d<sub>6</sub>)** δ 12.12 (s, 1H), 9.57 (s, 1H), 8.84 (d, *J* = 7.9 Hz, 1H), 8.70 (d, *J* = 2.9 Hz, 1H), 8.11 (d, *J* = 7.6 Hz, 1H), 8.03 (d, *J* = 8.5 Hz, 1H), 7.86 – 7.78 (m, 1H), 7.76 – 7.68 (m, 1H), 7.49 (d, *J* = 7.5 Hz, 1H), 7.21 (t, *J* = 7.8 Hz, 1H).

**<sup>13</sup>C NMR (151 MHz, DMSO-d<sub>6</sub>)** δ 150.8, 145.1, 142.2, 140.1, 136.0, 130.6, 130.5, 129.3, 129.0, 128.6, 127.8, 125.8, 122.8, 122.3, 114.5, 105.1.

**IR (cm<sup>-1</sup>)**: ν<sub>max</sub>; 3204, 3041, 1608, 1524, 1238, 1147, 745, 650.

**HRMS (ESI)**: calcd for C<sub>16</sub>H<sub>10</sub>BrN<sub>3</sub> [M+H]<sup>+</sup>:324.0136; found:324.0133.

### Synthesis of 2-(2-(naphthalen-2-yl)-1H-indol-3-yl) quinoxaline (3ao)

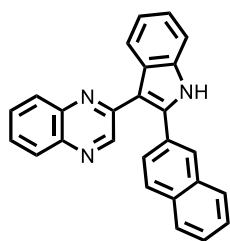

Prepared according to the general procedure (3a) mentioned above in 60% yield (66.8mg), eluent (20% EtOAc/hexane) to afford a yellow solid, mp= 168-170 °C.

**<sup>1</sup>H NMR (500 MHz, DMSO-d<sub>6</sub>)** δ 12.18 (s, 1H), 8.54 (s, 1H), 8.37 (d, *J* = 7.9 Hz, 1H), 8.27 (d, *J* = 1.8 Hz, 1H), 8.14 (dd, *J* = 8.5, 1.4 Hz, 1H), 8.05 – 7.95 (m, 4H), 7.84 (ddd, *J* = 8.4, 7.0, 1.5 Hz, 1H), 7.75 (ddd, *J* = 8.3, 7.0, 1.4 Hz, 1H), 7.67 (dd, *J* = 8.5, 1.8 Hz, 1H), 7.63 – 7.55 (m, 3H), 7.33 – 7.29 (m, 1H), 7.26 – 7.22 (m, 1H).

**<sup>13</sup>C NMR (126 MHz, DMSO-d<sub>6</sub>)** δ 151.5, 146.4, 142.6, 139.7, 139.7, 137.1, 133.4, 133.2, 130.6, 130.1, 129.1, 129.1, 129.0, 128.7, 128.7, 128.2, 128.0, 127.4, 127.3, 127.3, 123.4, 121.4, 121.2, 112.2, 110.7.

**IR (cm<sup>-1</sup>):** ν<sub>max</sub>; 3146, 3017, 1616, 1544, 1132, 739.

**HRMS (ESI):** calcd for C<sub>26</sub>H<sub>17</sub>N<sub>3</sub> [M+Na]<sup>+</sup>: 394.1320; found: 394.1340.

### Synthesis of 2-(2-methyl-1H-indol-3-yl) quinoxaline (3ap)

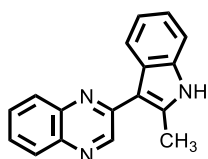

Prepared according to the general procedure (3a) mentioned above in 67% yield (52.1mg), eluent (20-25% EtOAc/hexane) to afford a yellow solid, mp= 142-144 °C.

**<sup>1</sup>H NMR (600 MHz, CDCl<sub>3</sub>)** δ 9.23 (s, 1H), 8.90 (s, 1H), 8.14 – 8.09 (m, 3H), 7.73 (ddd, *J* = 8.4, 6.9, 1.5 Hz, 1H), 7.67 (ddd, *J* = 8.3, 6.9, 1.4 Hz, 1H), 7.29 (d, *J* = 7.4 Hz, 1H), 7.24 – 7.18 (m, 2H), 2.67 (s, 3H).

**<sup>13</sup>C NMR (151 MHz, CDCl<sub>3</sub>)** δ 151.0, 145.5, 142.7, 139.9, 137.0, 135.3, 129.8, 128.8, 128.7, 128.3, 126.9, 122.2, 121.0, 119.3, 110.8, 110.6, 13.5.

**IR (cm<sup>-1</sup>):** ν<sub>max</sub>; 3154, 3051, 1620, 1578, 1431, 1274, 1126, 731.

**HRMS (ESI):** calcd for C<sub>17</sub>H<sub>13</sub>N<sub>3</sub> [M+Na]<sup>+</sup>:282.1007; found: 282.1012.

### Synthesis of 2-(2-phenyl-1H-indol-3-yl) quinoxaline (3aq)

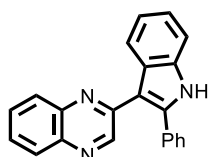

Prepared according to the general procedure (3a) mentioned above in 49% yield (47.2mg), eluent (20-25% EtOAc/hexane) to afford a yellow solid, mp= 218-220 °C.

**<sup>1</sup>H NMR (600 MHz, DMSO-*d*<sub>6</sub>)** δ 12.04 (s, 1H), 8.51 (s, 1H), 8.33 (d, *J* = 8.0 Hz, 1H), 8.12 (d, *J* = 8.4 Hz, 1H), 7.98 (d, *J* = 8.1 Hz, 1H), 7.84 (t, *J* = 7.5 Hz, 1H), 7.75 (t, *J* = 7.6 Hz, 1H), 7.63 – 7.61 (m, 2H), 7.54 – 7.51 (m, 4H), 7.28 (t, *J* = 7.5 Hz, 1H), 7.21 (t, *J* = 7.5 Hz, 1H).

**<sup>13</sup>C NMR (151 MHz, DMSO-*d*<sub>6</sub>)** δ 151.6, 146.5, 142.6, 139.8, 139.7, 137.0, 132.7, 130.6, 129.7, 129.6, 129.5, 129.2, 129.1, 128.0, 123.4, 121.4, 121.2, 112.2, 110.4.

**IR (cm<sup>-1</sup>):** ν<sub>max</sub>; 3232, 3050, 1649, 1546, 1237, 1103, 749.

**HRMS (ESI):** calcd for C<sub>22</sub>H<sub>15</sub>N<sub>3</sub>[M+H]<sup>+</sup>:322.1344; found: 322.1349.

### Synthesis of 1-methyl-3-(quinoxalin-2-yl)-1H-indole-5-carboxylic acid (3ar)

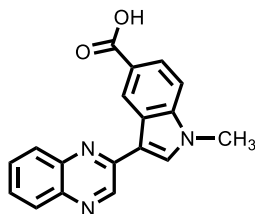

Prepared according to the general procedure (3a) mentioned above in 36% yield (32.7mg), eluent (25% EtOAc/hexane) to afford a yellow solid, mp= 246-248 °C.

**<sup>1</sup>H NMR (600 MHz, DMSO-*d*<sub>6</sub>)** δ 12.26 (s, 1H), 9.54 (s, 1H), 9.51 (d, *J* = 1.7 Hz, 1H), 8.75 (d, *J* = 2.8 Hz, 1H), 8.08 (dd, *J* = 8.4, 1.4 Hz, 1H), 8.05 (dd, *J* = 8.4, 1.4 Hz, 1H), 7.90 (dd, *J* = 8.3, 1.9 Hz, 1H), 7.85 (td, *J* = 7.4, 1.6 Hz, 1H), 7.76 – 7.73 (m, 1H), 7.62 (d, *J* = 8.6 Hz, 1H), 3.94 (s, 3H).

**<sup>13</sup>C NMR (151 MHz, DMSO-*d*<sub>6</sub>)** δ 167.7, 150.8, 145.0, 142.2, 140.2, 140.1, 131.1, 130.7, 129.3, 128.9, 128.7, 125.6, 125.4, 124.1, 122.9, 114.4, 112.6, 52.4.

**IR (cm<sup>-1</sup>):** ν<sub>max</sub>;3278, 3057, 1690, 1624, 1551, 1458, 1231, 1163, 1124, 743.

**HRMS (ESI):** calcd for C<sub>18</sub>H<sub>13</sub>N<sub>3</sub>O<sub>2</sub> [M+Na]<sup>+</sup>:326.0905; found: 326.0906.

### Synthesis of 2-(1-ethyl-2-methyl-1H-indol-3-yl) quinoxaline (3as)

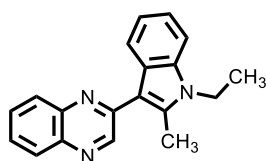

Prepared according to the general procedure (3a) mentioned above in 67% yield (57.7 mg), eluent (25% EtOAc/hexane) to afford a yellow solid, mp= 138-140 °C.

**<sup>1</sup>H NMR (600 MHz, CDCl<sub>3</sub>)** δ 9.24 (s, 1H), 8.11 (dd, *J* = 11.5, 8.5 Hz, 2H), 8.04 (d, *J* = 7.9 Hz, 1H), 7.74 (t, *J* = 7.7 Hz, 1H), 7.69 (t, *J* = 7.7 Hz, 1H), 7.39 (d, *J* = 8.1 Hz, 1H), 7.28 – 7.22 (m, 2H), 4.26 (q, *J* = 7.2 Hz, 2H), 2.79 (s, 3H), 1.43 (t, *J* = 7.2 Hz, 3H).

**<sup>13</sup>C NMR (151 MHz, CDCl<sub>3</sub>)** δ 151.3, 146.3, 142.9, 140.2, 137.8, 136.0, 129.9, 129.2, 129.0, 128.4, 126.7, 122.0, 121.1, 119.2, 110.9, 109.4, 38.1, 15.1, 11.6.

**IR (cm<sup>-1</sup>):** ν<sub>max</sub>; 3043, 1613, 1538, 1418, 1232, 1153, 736.

**HRMS (ESI):** calcd for C<sub>19</sub>H<sub>17</sub>N<sub>3</sub> [M+Na]<sup>+</sup>:310.1320; found:310.1321

### Synthesis of 2-(4-(benzyloxy)-1H-indol-3-yl) quinoxaline (3at)

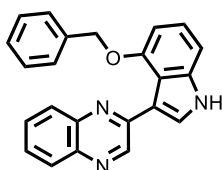

Prepared according to the general procedure (3a) mentioned above in 76% yield (80.0mg), eluent (20% EtOAc/hexane) to afford a yellow solid, mp=154-156 °C.

**<sup>1</sup>H NMR (200 MHz, CDCl<sub>3</sub>)** δ 10.02 (s, 1H), 9.37 (s, 1H), 8.11 – 8.00 (m, 2H), 7.70 – 7.55 (m, 3H), 7.13 (d, *J* = 2.9 Hz, 6H), 6.94 (d, *J* = 8.2 Hz, 1H), 6.64 (d, *J* = 7.7 Hz, 1H), 5.14 (s, 2H).

**<sup>13</sup>C NMR (50 MHz, CDCl<sub>3</sub>)** δ 153.1, 150.8, 148.3, 141.9, 140.4, 138.7, 136.7, 129.8, 128.9, 128.6, 128.5, 128.3, 127.7, 127.5, 127.2, 126.4, 123.6, 115.7, 115.1, 105.6, 102.7, 70.4.

**IR (cm<sup>-1</sup>):** ν<sub>max</sub>; 3096, 3048, 1634, 1542, 1470, 1232, 1141, 730.

**HRMS (ESI):** calcd for C<sub>23</sub>H<sub>17</sub>N<sub>3</sub>O [M+ Na]<sup>+</sup>:374.1269; found:374.1277

### Synthesis of 2-(7-(benzyloxy)-1H-indol-3-yl) quinoxaline (3au)

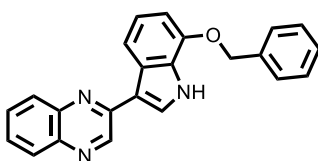

Prepared according to the general procedure (3a) mentioned above in 68% yield (71.6 mg), eluent (25% EtOAc/hexane) to afford a yellow solid, mp= 184-186 °C.

**<sup>1</sup>H NMR (600 MHz, CDCl<sub>3</sub>)** δ 9.23 (s, 1H), 8.95 (s, 1H), 8.33 (d, *J* = 8.1 Hz, 1H), 8.14 – 8.11 (m, 1H), 8.04 (dd, *J* = 8.6, 1.5 Hz, 1H), 7.94 (d, *J* = 2.8 Hz, 1H), 7.72 (td, *J* = 7.4, 1.4 Hz, 1H), 7.65 – 7.61 (m, 1H), 7.50 – 7.47 (m, 2H), 7.42 – 7.35 (m, 3H), 7.26 – 7.24 (m, 1H), 6.85 (d, *J* = 7.6 Hz, 1H), 5.23 (s, 2H).

**<sup>13</sup>C NMR (151 MHz, CDCl<sub>3</sub>)** δ 150.4, 145.4, 143.9, 142.8, 140.4, 136.8, 129.9, 129.1, 129.0, 128.7, 128.7, 128.3, 128.2, 128.0, 127.8, 127.1, 125.2, 122.3, 115.6, 115.1, 104.6, 70.5.

**IR (cm<sup>-1</sup>):**  $\nu_{\max}$ ; 3141, 3057, 1624, 1549, 1448, 1237, 1190, 1135, 721.

**HRMS (ESI):** calcd for C<sub>23</sub>H<sub>17</sub>N<sub>3</sub>O [M+H]<sup>+</sup>:352.1450; found:352.1456.

#### Synthesis of 2-(1-methyl-1H-indol-3-yl) quinoxaline (3av)

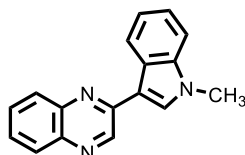

Prepared according to the general procedure (3a) mentioned above in 62% yield (48.2mg), eluent (25% EtOAc/hexane) to afford a yellow solid, mp= 74-76 °C.

**<sup>1</sup>H NMR (600 MHz, CDCl<sub>3</sub>)**  $\delta$  9.17 (s, 1H), 8.80 – 8.76 (m, 1H), 8.11 (dd,  $J$  = 8.3, 1.4 Hz, 1H), 8.05 – 8.01 (m, 1H), 7.79 (s, 1H), 7.72 (ddd,  $J$  = 8.5, 6.9, 1.5 Hz, 1H), 7.65 – 7.61 (m, 1H), 7.36 (d,  $J$  = 3.4 Hz, 3H), 3.84 (s, 3H).

**<sup>13</sup>C NMR (151 MHz, CDCl<sub>3</sub>)**  $\delta$  150.4, 143.8, 142.8, 140.2, 137.9, 130.2, 129.9, 129.0, 127.9, 126.4, 123.1, 122.6, 121.6, 113.4, 109.7, 33.4.

**IR (cm<sup>-1</sup>):**  $\nu_{\max}$ ; 3052, 1610, 1550, 1455, 1337, 1225, 1122, 737.

**HRMS (ESI)** calcd for C<sub>17</sub>H<sub>13</sub>N<sub>3</sub> [M+H]<sup>+</sup>:322.1344; found: 322.1349.

#### Synthesis of 2-(1-butyl-1H-indol-3-yl) quinoxaline (3aw)

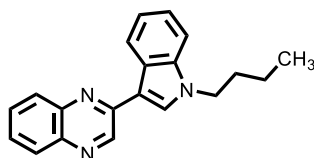

Prepared according to the general procedure (3a) mentioned above in 50% yield (45.2mg), eluent (15-20% EtOAc/hexane) to afford a yellow solid, mp= 88-90 °C.

**<sup>1</sup>H NMR (600 MHz, DMSO-d<sub>6</sub>)**  $\delta$  9.45 (s, 1H), 8.83 (d,  $J$  = 7.5 Hz, 1H), 8.67 (s, 1H), 8.08 (dd,  $J$  = 8.7, 1.5 Hz, 1H), 8.01 (dd,  $J$  = 8.2, 1.5 Hz, 1H), 7.81 – 7.78 (m, 1H), 7.71 – 7.67 (m, 1H), 7.62 (d,  $J$  = 7.7 Hz, 1H), 7.32 – 7.27 (m, 2H), 4.30 (t,  $J$  = 7.1 Hz, 2H), 1.88 – 1.84 (m, 2H), 1.36 – 1.31 (m, 2H), 0.93 (t,  $J$  = 7.4 Hz, 3H).

**<sup>13</sup>C NMR (151 MHz, DMSO-d<sub>6</sub>)**  $\delta$  151.0, 144.9, 142.4, 139.9, 137.5, 132.3, 130.5, 129.2, 128.9, 128.3, 126.5, 123.2, 123.1, 121.6, 112.5, 111.0, 46.3, 32.2, 20.0, 14.0.

**IR (cm<sup>-1</sup>):**  $\nu_{\max}$ ; 3057, 1613, 1546, 1455, 1217, 1199, 733

**HRMS (ESI):** calcd for C<sub>20</sub>H<sub>19</sub>N<sub>3</sub> [M+H]<sup>+</sup>:302.1657; found: 302.1663.

### Synthesis of 3-(3-(quinoxalin-2-yl)-1H-indol-1-yl) propanenitrile (3ax)

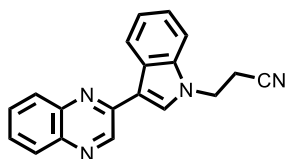

Prepared according to the general procedure (3a) mentioned above in 43% yield (38.4mg), eluent (20% EtOAc/hexane) to afford a yellow solid, mp= 104-106 °C.

**<sup>1</sup>H NMR (600 MHz, DMSO-*d*<sub>6</sub>)** δ 9.42 (s, 1H), 8.82 (d, *J* = 7.7 Hz, 1H), 8.71 (s, 1H), 8.11 (d, *J* = 8.2 Hz, 1H), 8.03 (d, *J* = 8.3 Hz, 1H), 7.82 (t, *J* = 7.6 Hz, 1H), 7.77 – 7.70 (m, 2H), 7.34 (dt, *J* = 18.6, 7.1 Hz, 2H), 4.65 (t, *J* = 6.6 Hz, 2H), 3.21 (t, *J* = 6.7 Hz, 2H).

**<sup>13</sup>C NMR (151 MHz, DMSO-*d*<sub>6</sub>)** δ 150.7, 144.7, 142.3, 140.0, 137.3, 132.1, 130.7, 129.3, 129.0, 128.6, 126.5, 123.5, 123.1, 122.0, 119.2, 113.3, 111.1, 42.3, 19.0.

**IR (cm<sup>-1</sup>):** ν<sub>max</sub>; 3054, 2247, 1614, 1506, 1458, 1395, 1250, 1096, 695.

**HRMS (ESI):** calcd for C<sub>19</sub>H<sub>14</sub>N<sub>4</sub> [M+Na]<sup>+</sup>:321.1116; found: 321.1111.

### Synthesis of 2-(1-phenyl-1H-indol-3-yl) quinoxaline (3ay)

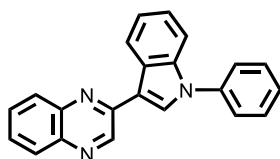

Prepared according to the general procedure (3a) mentioned above in 39% yield (37.6mg), eluent (20% EtOAc/hexane) to afford a yellow solid, mp= 88-90 °C.

**<sup>1</sup>H NMR (600 MHz, DMSO-*d*<sub>6</sub>)** δ 9.60 (s, 1H), 8.96 (d, *J* = 3.5 Hz, 2H), 8.15 (dd, *J* = 8.4, 1.5 Hz, 1H), 8.06 – 8.03 (m, 1H), 7.85 – 7.82 (m, 1H), 7.78 – 7.72 (m, 3H), 7.70 – 7.66 (m, 2H), 7.63 (dd, *J* = 6.5, 2.3 Hz, 1H), 7.53 (t, *J* = 7.6 Hz, 1H), 7.40 – 7.36 (m, 2H).

**<sup>13</sup>C NMR (151 MHz, DMSO-*d*<sub>6</sub>)** δ 150.6, 145.2, 142.2, 140.2, 138.8, 137.0, 132.1, 130.7, 130.5, 129.3, 129.1, 128.8, 128.0, 127.2, 125.0, 124.4, 123.5, 122.6, 114.8, 111.4.

**IR (cm<sup>-1</sup>):** ν<sub>max</sub>; 3044, 1595, 1539, 1215, 1141, 739.

**HRMS (ESI):** calcd for C<sub>22</sub>H<sub>15</sub>N<sub>3</sub> [M+Na]<sup>+</sup>:344.1164; found: 344.1176

### Synthesis of 2-(1H-indol-3-yl)-8-methylquinoxaline (3az)

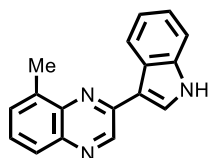

Prepared according to the general procedure (3a) mentioned above in 44% yield (34.2mg), eluent (25% EtOAc/hexane) to afford a yellow solid, mp=152-154 °C.

**<sup>1</sup>H NMR (600 MHz, DMSO-*d*<sub>6</sub>)** δ 11.90 (s, 1H), 9.50 (s, 1H), 8.80 (dd, *J* = 6.0, 3.3 Hz, 1H), 8.63 (d, *J* = 2.9 Hz, 1H), 7.84 (d, *J* = 8.2 Hz, 1H), 7.66 (d, *J* = 7.0 Hz, 1H), 7.58 (d, *J* = 7.8 Hz, 1H), 7.54 (dd, *J* = 6.0, 3.1 Hz, 1H), 7.27 (dd, *J* = 6.0, 3.0 Hz, 2H), 2.86 (s, 3H).

**<sup>13</sup>C NMR (151 MHz, DMSO-*d*<sub>6</sub>)** δ 150.2, 144.5, 141.2, 139.9, 137.7, 136.6, 130.3, 129.3, 127.8, 127.1, 126.0, 123.2, 122.7, 121.5, 113.8, 112.5, 17.8.

**IR (cm<sup>-1</sup>):** ν<sub>max</sub>; 3130, 3053, 1617, 1547, 1446, 1239, 1139, 736

**HRMS (ESI):** calcd for C<sub>17</sub>H<sub>13</sub>N<sub>3</sub> [M+H]<sup>+</sup>:260.1188; found:260.1202

### Synthesis of 3-(1H-indol-3-yl) quinoxalin-5-ol (3ba)

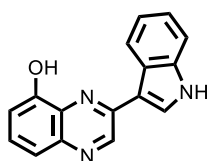

Prepared according to the general procedure (3a) mentioned above in 42% yield (33.0mg), eluent (25% EtOAc/hexane) to afford a yellow solid, mp=270-272 °C.

**<sup>1</sup>H NMR (200 MHz, DMSO-*d*<sub>6</sub>)** δ 11.91 (s, 1H), 10.17 (s, 1H), 9.39 (s, 1H), 8.82 – 8.75 (m, 1H), 8.63 (d, *J* = 2.9 Hz, 1H), 7.65 – 7.49 (m, 3H), 7.30 – 7.22 (m, 2H), 7.03 (dd, *J* = 7.5, 1.6 Hz, 1H).

**<sup>13</sup>C NMR (50 MHz, DMSO-*d*<sub>6</sub>)** δ 154.1, 151.4, 143.3, 142.2, 137.6, 131.0, 130.7, 129.3, 126.0, 123.1, 122.7, 121.3, 118.8, 113.3, 112.4, 111.2.

**IR (cm<sup>-1</sup>):** ν<sub>max</sub>; 3340, 3137, 3022, 1627, 1555, 1207, 1167, 1104, 697.

**HRMS (ESI):** calcd for C<sub>16</sub>H<sub>11</sub>N<sub>3</sub> [M+Na]<sup>+</sup>:284.0800; found: 284.0812.

### Synthesis of 2-(1H-indol-3-yl)-6-methylquinoxaline (3bb)

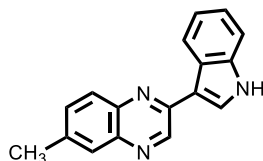

Prepared according to the general procedure (3a) mentioned above in 71% yield (55.2mg), eluent (25% EtOAc/hexane) to afford a brownish yellow solid mp=154-156 °C.

**<sup>1</sup>H NMR (600 MHz, DMSO-*d*<sub>6</sub>)** δ 11.10 (s, 1H), 8.64 (s, 1H), 8.07 – 8.01 (m, 1H), 7.79 (d, *J* = 2.9 Hz, 1H), 7.18 – 7.03 (m, 2H), 6.76 (dd, *J* = 5.4, 3.1 Hz, 1H), 6.69 (dd, *J* = 8.4, 2.1 Hz, 1H), 6.49 – 6.45 (m, 2H), 1.74 (s, 3H).

**<sup>13</sup>C NMR (151 MHz, DMSO-*d*<sub>6</sub>)** δ 151.3, 144.0, 142.4, 140.4, 138.3, 137.6, 132.4, 130.2, 129.1, 128.7, 127.9, 126.1, 123.1, 121.3, 113.5, 112.5, 21.7.



**IR (cm<sup>-1</sup>):**  $\nu_{\text{max}}$ ; 3187, 3074, 1598, 1548, 1482, 1233, 1109, 742.

The chemical compounds have been described.<sup>3</sup>

### Synthesis of 6-fluoro-2-(1H-indol-3-yl) quinoxaline (3bc)

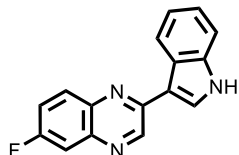

Prepared according to the general procedure (3a) mentioned above in 71% yield (56.1mg), eluent (25% EtOAc/hexane) to afford a yellow solid, mp= 164-166 °C.

**<sup>1</sup>H NMR (600 MHz, DMSO-d<sub>6</sub>)**  $\delta$  11.96 – 11.89 (m, 1H), 9.44 (s, 1H), 8.77 – 8.75 (m, 1H), 8.60 (d,  $J = 2.9$  Hz, 1H), 8.00 (dd,  $J = 9.1, 5.9$  Hz, 1H), 7.78 (dd,  $J = 9.7, 2.6$  Hz, 1H), 7.54 – 7.48 (m, 2H), 7.24 – 7.19 (m, 2H).

**<sup>13</sup>C NMR (151 MHz, DMSO-d<sub>6</sub>)**  $\delta$  163.6, 162.0, 152.1, 144.5, 143.4, 143.3, 137.7, 137.1, 131.6, 131.5, 130.1, 126.0, 123.3, 122.9, 121.5, 117.8, 117.6, 113.2, 112.6, 112.4.

**<sup>19</sup>F NMR (471 MHz DMSO-d<sub>6</sub>):** -109.62.

**IR (cm<sup>-1</sup>):** 3167 3047, 1615, 1543, 1243, 1168, 1143, 737.

**HRMS (ESI):** calcd for C<sub>16</sub>H<sub>10</sub>N<sub>3</sub>F [M+H]<sup>+</sup>:264.0937; found: 264.0947.

### Synthesis of 3-(1H-indol-3-yl) quinoxalin-2(1H)-one (3bd)

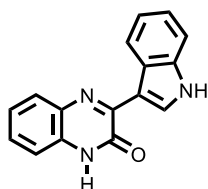

Prepared according to the general procedure (3b) mentioned above in 57% yield (44.6mg), eluent (20-25% EtOAc/hexane) to afford an orange solid, mp=300-302 °C.

**<sup>1</sup>H NMR (200 MHz, DMSO-d<sub>6</sub>)**  $\delta$  12.42 (s, 1H), 11.80 (s, 1H), 8.96 (d,  $J = 2.9$  Hz, 1H), 8.90 (dd,  $J = 6.4, 3.0$  Hz, 1H), 7.88 (d,  $J = 7.7$  Hz, 1H), 7.56 – 7.40 (m, 2H), 7.37 – 7.22 (m, 4H).

**<sup>13</sup>C NMR (50 MHz, DMSO-d<sub>6</sub>)**  $\delta$  154.8, 152.4, 136.7, 133.5, 133.1, 130.6, 128.4, 128.0, 126.6, 123.7, 123.4, 123.0, 121.4, 115.4, 112.3, 111.7.

**IR (cm<sup>-1</sup>):**  $\nu_{\text{max}}$ ; 3130, 3053, 1617, 1547, 1446, 1239, 1139, 736

The chemical compounds have been described.<sup>4</sup>

### Synthesis of 3-(1H-indol-3-yl)-1-methylquinoxalin-2(1H)-one (3be)

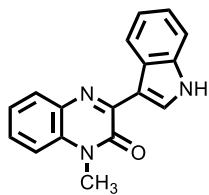

Prepared according to the general procedure (3b) mentioned above in 75% yield (61.9mg), eluent (20% EtOAc/hexane) to afford an orange solid, mp= 250-252 °C.

**<sup>1</sup>H NMR (200 MHz, DMSO-*d*<sub>6</sub>)** δ 10.97 (s, 1H), 8.09 (dd, *J* = 9.6, 3.2 Hz, 2H), 7.08 (d, *J* = 7.6 Hz, 1H), 6.70 (dd, *J* = 6.5, 3.0 Hz, 3H), 6.56 (dd, *J* = 7.7, 4.3 Hz, 1H), 6.43 (dd, *J* = 6.1, 3.2 Hz, 2H), 2.89 (s, 3H).

**<sup>13</sup>C NMR (50 MHz, DMSO-*d*<sub>6</sub>)** δ 154.1, 151.0, 136.7, 133.6, 133.4, 131.9, 128.8, 128.7, 126.7, 123.8, 123.4, 123.0, 121.4, 114.8, 112.3, 111.8, 29.5.

**IR (cm<sup>-1</sup>):** ν<sub>max</sub>; 3254, 3032, 1736, 1625, 1532, 1429, 1175, 741.

**HRMS (ESI)** calcd for C<sub>17</sub>H<sub>13</sub>N<sub>3</sub>O [M+Na]<sup>+</sup>:298.0956; found: 298.0969.

#### Synthesis of 1-ethyl-3-(1H-indol-3-yl) quinoxalin-2(1H)-one (3bf)

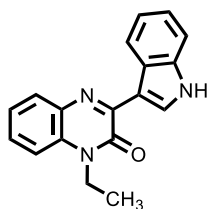

Prepared according to the general procedure (3b) mentioned above in 73% yield (63.3mg), eluent (20% EtOAc/hexane) to afford a brownish solid, mp=188-190 °C.

**<sup>1</sup>H NMR (200 MHz, DMSO-*d*<sub>6</sub>)** δ 11.82 (s, 1H), 8.94 (dd, *J* = 11.8, 3.1 Hz, 2H), 7.94 (d, *J* = 7.8 Hz, 1H), 7.53 (d, *J* = 6.3 Hz, 3H), 7.42 – 7.33 (m, 1H), 7.26 (dd, *J* = 6.1, 3.2 Hz, 2H), 4.37 (q, *J* = 6.9 Hz, 2H), 1.30 (t, *J* = 7.0 Hz, 3H).

**<sup>13</sup>C NMR (50 MHz, DMSO-*d*<sub>6</sub>)** δ 153.6, 151.1, 136.7, 133.7, 133.6, 130.7, 129.1, 128.8, 126.8, 123.8, 123.4, 123.0, 121.4, 114.5, 112.3, 111.8, 37.34, 12.8.

**IR (cm<sup>-1</sup>):** ν<sub>max</sub>; 3242, 3028, 1633, 1575, 1453, 1431, 1216, 1113, 737.

The chemical compounds have been described.<sup>5</sup>

#### Synthesis of 1-benzyl-3-(1H-indol-3-yl) quinoxalin-2(1H)-one (3bg)

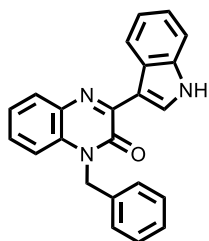

Prepared according to the general procedure (3b) mentioned above in 80% yield (84.3mg), eluent (20% EtOAc/hexane) to afford a brownish solid, mp=194-196 °C.

**<sup>1</sup>H NMR (200 MHz, CDCl<sub>3</sub>)** δ 9.08 – 9.01 (m, 1H), 8.96 (d, *J* = 2.9 Hz, 1H), 8.70 (s, 1H), 8.05 – 7.97 (m, 1H), 7.40 – 7.30 (m, 5H), 7.30 – 7.21 (m, 6H), 5.59 (s, 2H).

**<sup>13</sup>C NMR (50 MHz, CDCl<sub>3</sub>)** δ 154.6, 151.0, 136.1, 135.5, 134.0, 132.4, 131.0, 129.5, 128.9, 128.4, 127.5, 126.6, 123.7, 123.4, 123.2, 121.8, 114.2, 112.9, 111.2, 46.0.

**IR (cm<sup>-1</sup>):** ν<sub>max</sub>; 3108, 3047, 1682, 1627, 1533, 1237, 1129, 743

The chemical compounds have been described.<sup>4</sup>

### Synthesis of 3-(5-methoxy-1H-indol-3-yl)-1-methylquinoxalin-2(1H)-one (3bh)

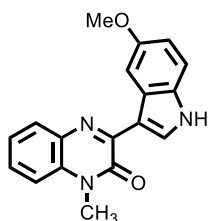

Prepared according to the general procedure (3b) mentioned above in 60% yield (55.0mg), eluent (20% EtOAc/hexane) to afford an orange solid, mp= 264-266 °C.

**<sup>1</sup>H NMR (200 MHz, DMSO-*d*<sub>6</sub>)** δ 11.67 (s, 1H), 8.89 (d, *J* = 3.0 Hz, 1H), 8.48 (d, *J* = 2.6 Hz, 1H), 7.90 (d, *J* = 7.7 Hz, 1H), 7.53 (d, *J* = 3.9 Hz, 2H), 7.42 (d, *J* = 8.7 Hz, 2H), 6.90 (dd, *J* = 8.8, 2.6 Hz, 1H), 3.89 (s, 3H), 3.73 (s, 3H).

**<sup>13</sup>C NMR (50 MHz, DMSO-*d*<sub>6</sub>)** δ 155.3, 154.1, 151.1, 133.9, 133.4, 131.8, 131.6, 128.7, 128.6, 127.4, 123.9, 114.8, 112.9, 112.5, 111.6, 105.5, 55.7, 29.5.

**IR (cm<sup>-1</sup>):** ν<sub>max</sub>; 3149, 2935, 1641, 1527, 1411, 1196, 1137, 741.

The chemical compounds have been described.<sup>5</sup>

### Synthesis of 1-methyl-3-(5-(trifluoromethyl)-1H-indol-3-yl) quinoxalin-2(1H)-one (3bi)

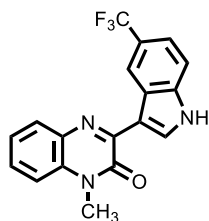

Prepared according to the general procedure (3b) mentioned above in 79% yield (81.3mg), eluent (20% EtOAc/hexane) to afford a brownish solid, mp=288-290 °C.

**<sup>1</sup>H NMR (200 MHz, DMSO-*d*<sub>6</sub>)** δ 12.15 (s, 1H), 9.23 (s, 1H), 9.03 (s, 1H), 7.83 (d, *J* = 7.8 Hz, 1H), 7.72 (d, *J* = 8.5 Hz, 1H), 7.54 (d, *J* = 5.5 Hz, 3H), 7.44 – 7.35 (m, 1H), 3.71 (s, 3H).

**<sup>13</sup>C NMR (50 MHz, DMSO-*d*<sub>6</sub>)** δ 153.9, 150.6, 138.3, 135.3, 133.0, 132.0, 129.1, 128.8, 126.1, 123.9, 123.6, 122.2, 120.7, 119.4, 114.9, 113.1, 112.3, 29.5.

**<sup>19</sup>F NMR (471 MHz, DMSO-*d*<sub>6</sub>)** δ -58.67.

**IR (cm<sup>-1</sup>):** ν<sub>max</sub>; 3204, 3066, 1712, 1602, 1560, 1454, 1196, 1087, 741.

**HRMS (ESI):** calcd for C<sub>18</sub>H<sub>12</sub>F<sub>3</sub>N<sub>3</sub>O<sub>2</sub> [M+Na]<sup>+</sup>:366.0830; found: 366.0854.

### Synthesis of 3-(7-(benzyloxy)-1H-indol-3-yl)-1-methylquinoxalin-2(1H)-one (3bj)

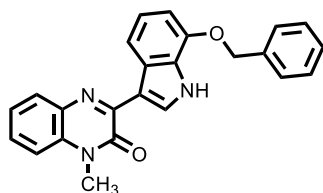

Prepared according to the general procedure (3b) mentioned above in 51% yield (58.3mg), eluent (20% EtOAc/hexane) to afford an orange solid, mp= 228-230 °C.

**<sup>1</sup>H NMR (200 MHz, DMSO-*d*<sub>6</sub>)** δ 11.84 (s, 1H), 8.76 (d, *J* = 3.0 Hz, 1H), 8.41 (d, *J* = 8.0 Hz, 1H), 7.80 (dd, *J* = 7.7, 1.0 Hz, 1H), 7.55 – 7.47 (m, 2H), 7.43 – 7.24 (m, 6H), 7.06 (t, *J* = 7.9 Hz, 1H), 6.82 (d, *J* = 8.0 Hz, 1H), 5.20 (s, 2H), 3.61 (s, 3H).

**<sup>13</sup>C NMR (50 MHz, DMSO-*d*<sub>6</sub>)** δ 154.1, 151.0, 145.6, 137.6, 133.4, 133.0, 131.9, 128.8, 128.8, 128.7, 128.5, 128.3, 128.1, 126.9, 123.8, 122.0, 116.4, 114.8, 112.4, 105.1, 69.8, 29.5.

**IR (cm<sup>-1</sup>):** ν<sub>max</sub>; 3199, 3043, 1625, 1603, 1247, 1179, 1096, 727.

**HRMS (ESI):** calcd for C<sub>24</sub>H<sub>19</sub>N<sub>3</sub>O<sub>2</sub> [M+Na]<sup>+</sup>:404.1375; found: 404.1383.

### Synthesis of 1-methyl-3-(2-(naphthalen-2-yl)-1H-indol-3-yl) quinoxalin-2(1H)-one (3bk)

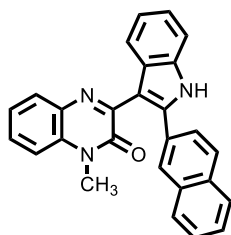

Prepared according to the general procedure (3b) mentioned above in 53% yield (63.8mg), eluent (20% EtOAc/hexane) to afford an orange solid, mp=168-170 °C.

**<sup>1</sup>H NMR (200 MHz, DMSO-*d*<sub>6</sub>)** δ 11.92 (s, 1H), 8.09 (s, 1H), 7.85 – 7.63 (m, 5H), 7.54 – 7.40 (m, 6H), 7.33 – 7.24 (m, 1H), 7.17 – 6.98 (m, 2H), 3.47 (s, 3H).

**<sup>13</sup>C NMR (50 MHz, DMSO-*d*<sub>6</sub>)** δ 154.2, 153.8, 139.7, 136.6, 133.5, 133.3, 133.2, 132.8, 131.3, 130.2, 129.4, 129.1, 128.5, 128.0, 127.0, 126.8, 126.7, 123.8, 122.7, 120.9, 120.5, 120.2, 115.0, 111.9, 110.0, 29.7.

**IR (cm<sup>-1</sup>):** ν<sub>max</sub>; 3245, 3022, 1738, 1644, 1577, 1446, 1145, 740.

The chemical compounds have been described.<sup>4</sup>

### Synthesis of 5,6,10c,11,16,16a-hexahydrodiindolo[3,2-a:2',3'-c] phenazine (4aa)

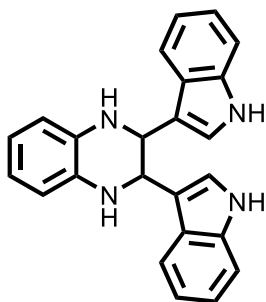

Prepared according to the general procedure (3c) mentioned above in 66% yield (72.0mg), eluent (25-30% EtOAc/hexane) to afford off white solid, mp= 193-195 °C.

**<sup>1</sup>H NMR (600 MHz, DMSO-d<sub>6</sub>)** δ 10.72 (s, 2H), 7.42 (d, *J* = 8.0 Hz, 2H), 7.24 (d, *J* = 8.2 Hz, 2H), 7.04 (d, *J* = 2.3 Hz, 2H), 6.97 (t, *J* = 7.5 Hz, 2H), 6.83 (t, *J* = 7.4 Hz, 2H), 6.56 (dd, *J* = 5.8, 3.4 Hz, 2H), 6.40 (dd, *J* = 5.7, 3.4 Hz, 2H), 5.60 (s, 2H), 4.82 (s, 2H).

**<sup>13</sup>C NMR (151 MHz, DMSO-d<sub>6</sub>)** δ 135.7, 134.0, 126.0, 122.9, 120.3, 118.7, 117.8, 116.3, 115.3, 112.5, 110.9, 52.9.

**IR (cm<sup>-1</sup>):** ν<sub>max</sub>; 3394, 3165, 3018, 1503, 1366, 1230, 1094, 736.

**HRMS (ESI):** calcd for C<sub>24</sub>H<sub>18</sub>N<sub>4</sub> [M+Na]<sup>+</sup>: 387.1586; found: 387.1584.

### Synthesis of 3,3'-(1,2,3,4-tetrahydroquinoxaline-2,3-diyl) bis(1H-indol-4-ol) (4ab)

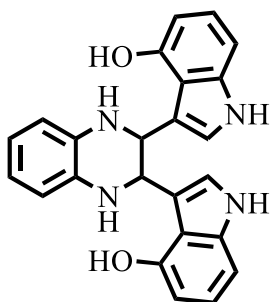

Prepared according to the general procedure (3c) mentioned above in 34% yield (40.4mg), eluent (25-30% EtOAc/hexane) to afford a bluish grey solid, mp= 220-222 °C.

**<sup>1</sup>H NMR (600 MHz, DMSO-d<sub>6</sub>)** δ 10.60 (s, 2H), 10.50 (s, 2H), 6.88 (t, *J* = 7.8 Hz, 2H), 6.81 (dd, *J* = 5.8, 3.4 Hz, 2H), 6.76 (d, *J* = 8.1 Hz, 2H), 6.74 – 6.69 (m, 4H), 6.37 – 6.32 (m, 4H), 4.65 (s, 2H).

$^{13}\text{C}$  NMR (151 MHz, DMSO- $d_6$ )  $\delta$  150.1, 137.9, 132.8, 121.7, 121.7, 119.5, 116.0, 115.1, 103.3, 102.3, 53.7.

IR ( $\text{cm}^{-1}$ ):  $\nu_{\text{max}}$ ; 3264, 3120, 3076, 2920, 1578, 1243, 1159, 1085, 746.

HRMS (ESI): calcd for  $\text{C}_{24}\text{H}_{20}\text{N}_4\text{O}_2$   $[\text{M}+\text{Na}]^+$ : 419.1484; found: 419.1479.

#### Synthesis of 2,3-bis(4-methoxy-1H-indol-3-yl)-1,2,3,4-tetrahydroquinoxaline (4ac)

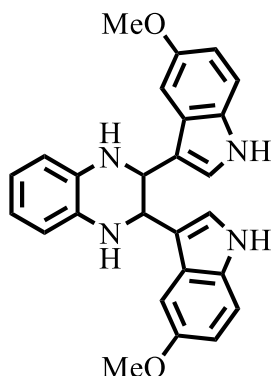

Prepared according to the general procedure (3c) mentioned above in 60% yield (76.4mg), eluent (25-30% EtOAc/hexane) to afford an off white solid, mp= 126-128 °C.

$^1\text{H}$  NMR (600 MHz, DMSO- $d_6$ )  $\delta$  10.58 (s, 2H), 7.11 (d,  $J = 8.6$  Hz, 2H), 7.02 (d,  $J = 2.7$  Hz, 2H), 6.76 (d,  $J = 2.6$  Hz, 2H), 6.62 – 6.53 (m, 4H), 6.40 (s, 2H), 5.57 (s, 2H), 4.71 (s, 2H), 3.50 (s, 6H).

$^{13}\text{C}$  NMR (151 MHz, DMSO- $d_6$ )  $\delta$  152.9, 134.7, 131.5, 127.2, 124.1, 116.9, 115.7, 113.1, 112.1, 111.2, 101.0, 55.2, 54.0.

IR ( $\text{cm}^{-1}$ ):  $\nu_{\text{max}}$ ; 3358, 3179, 3066, 1503, 1485, 1384, 1277, 1195, 1120, 720.

HRMS (ESI): calcd for  $\text{C}_{26}\text{H}_{24}\text{N}_4\text{O}_2$   $[\text{M}+\text{Na}]^+$ : 447.1797; found 447.1798.

#### Synthesis of 2,3-bis(4-bromo-1H-indol-3-yl)-1,2,3,4-tetrahydroquinoxaline (4ad)

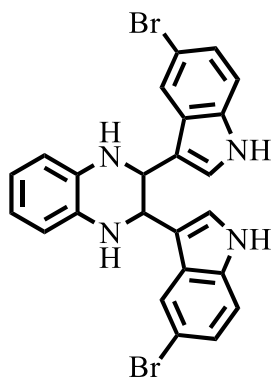

Prepared according to the general procedure (3c) mentioned above in 50% yield (78.3mg), eluent (25-30% EtOAc/hexane) to afford a brownish yellow solid, mp= 202-204 °C.

**<sup>1</sup>H NMR (600 MHz, DMSO-*d*<sub>6</sub>)** δ 10.98 (d, *J* = 2.5 Hz, 2H), 7.37 (s, 2H), 7.22 (d, *J* = 8.6 Hz, 2H), 7.07 (dt, *J* = 5.5, 2.5 Hz, 4H), 6.58 (s, 2H), 6.43 (s, 2H), 5.73 (s, 2H), 4.66 (s, 2H).

**<sup>13</sup>C NMR (151 MHz, DMSO-*d*<sub>6</sub>)** δ 135.3, 134.7, 128.7, 125.5, 123.6, 121.8, 117.4, 115.6, 113.8, 113.5, 111.4, 54.1.

**IR (cm<sup>-1</sup>):** ν<sub>max</sub>; 3244, 3181, 3020, 1608, 1503, 1366, 1229, 1100, 739, 624.

**HRMS (ESI):** calcd for C<sub>24</sub>H<sub>18</sub>Br<sub>2</sub>N<sub>4</sub> [M+K]<sup>+</sup>: 558.9535; found 558.9531

**Synthesis of 2,3-bis(6-chloro-1H-indol-3-yl)-1,2,3,4-tetrahydroquinoxaline (4ae)**

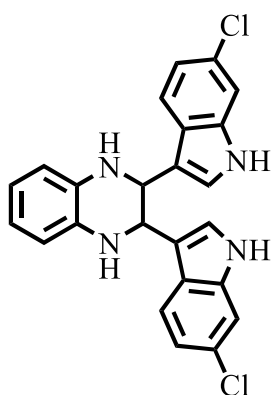

Prepared according to the general procedure (3c) mentioned above in 57% yield (74.1 mg), eluent (25-30% EtOAc/hexane) to afford a brownish yellow solid, mp= 202-204 °C.

**<sup>1</sup>H NMR (500 MHz, DMSO-*d*<sub>6</sub>)** δ 10.90 (s, 2H), 7.35 – 7.25 (m, 4H), 7.07 (d, *J* = 2.5 Hz, 2H), 6.82 (dd, *J* = 8.4, 2.0 Hz, 2H), 6.56 (dd, *J* = 5.7, 3.3 Hz, 2H), 6.41 (dd, *J* = 5.8, 3.4 Hz, 2H), 5.70 (s, 2H), 4.72 (s, 2H).

**<sup>13</sup>C NMR (126 MHz, DMSO-*d*<sub>6</sub>)** δ 135.79, 133.63, 124.69, 124.54, 123.84, 119.71, 117.88, 116.21, 115.03, 112.37, 110.26, 52.86.

**IR (cm<sup>-1</sup>):** ν<sub>max</sub>; 3345, 3120, 3010, 1548, 1265, 1148, 752, 698

**HRMS (ESI):** calcd for C<sub>24</sub>H<sub>18</sub>Cl<sub>2</sub>N<sub>4</sub> [M+Na]<sup>+</sup>: 433.0987; found 433.0969.

### Synthesis of 2,3-bis(7-methyl-1H-indol-3-yl)-1,2,3,4-tetrahydroquinoxaline (4af)

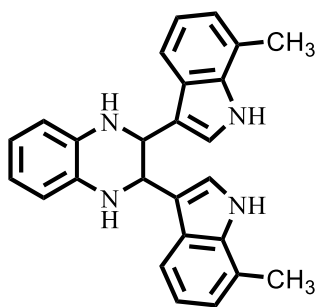

Prepared according to the general procedure (3c) mentioned above in 69% yield (81.2mg), eluent (25-30% EtOAc/hexane) to afford a brownish yellow solid, mp=196-198 °C.

**<sup>1</sup>H NMR (500 MHz, DMSO-d<sub>6</sub>)** δ 10.63 (s, 2H), 7.27 – 7.23 (m, 2H), 6.97 (d, *J* = 2.6 Hz, 2H), 6.71 (d, *J* = 6.0 Hz, 4H), 6.48 (dd, *J* = 5.7, 3.4 Hz, 2H), 6.33 (dd, *J* = 5.7, 3.4 Hz, 2H), 5.47 (s, 2H), 4.78 (s, 2H), 2.30 (s, 6H).

**<sup>13</sup>C NMR (126 MHz, DMSO-d<sub>6</sub>)** δ 136.0, 134.7, 126.5, 123.5, 121.6, 120.7, 118.9, 117.2, 117.0, 116.5, 113.2, 53.4, 17.2.

**IR (cm<sup>-1</sup>):** ν<sub>max</sub>; 3287, 3104, 3026, 1525, 1430, 1241, 1150, 710

**HRMS (ESI):** calcd for C<sub>26</sub>H<sub>24</sub> N<sub>4</sub> [M+Na]<sup>+</sup>: 415.1899; found 415.1912.

### Synthesis of 2,3-bis(1H-benzo[f]indol-3-yl)-1,2,3,4-tetrahydroquinoxaline (4ag)

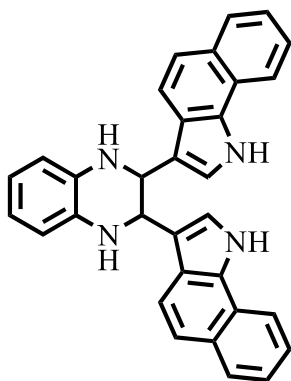

Prepared according to the general procedure (3c) mentioned above in 43% yield (59.9mg), eluent (25-30% EtOAc/hexane) to afford a brownish yellow solid, mp=230-232 °C.

**<sup>1</sup>H NMR (600 MHz, DMSO-d<sub>6</sub>)** δ 10.81 (s, 2H), 7.36 (d, *J* = 8.1 Hz, 2H), 6.95 (d, *J* = 8.1 Hz, 2H), 6.67 (d, *J* = 8.7 Hz, 2H), 6.58 (t, *J* = 7.6 Hz, 2H), 6.47 (t, *J* = 7.5 Hz, 2H), 6.38 (d, *J* = 8.6



Hz, 2H), 6.26 (d,  $J = 2.5$  Hz, 2H), 5.79 – 5.75 (m, 2H), 5.59 (dd,  $J = 5.8, 3.5$  Hz, 2H), 4.90 (s, 2H), 4.05 (s, 2H).

$^{13}\text{C}$  NMR (151 MHz, DMSO- $d_6$ )  $\delta$  134.9, 130.9, 130.0, 128.6, 125.4, 123.7, 122.8, 122.5, 122.0, 120.9, 120.3, 119.3, 117.9, 117.2, 113.5, 54.5.

IR ( $\text{cm}^{-1}$ ):  $\nu_{\text{max}}$ ; 3325, 3148, 3034, 1592, 1217, 1116, 739.

HRMS (ESI): calcd for  $\text{C}_{32}\text{H}_{24}\text{N}_4$   $[\text{M}+\text{Na}]^+$ : 487.1899 found 487.1924.

#### Synthesis of 2,3-di(1H-indol-3-yl)-5-methyl-1,2,3,4-tetrahydroquinoxaline (4ah)

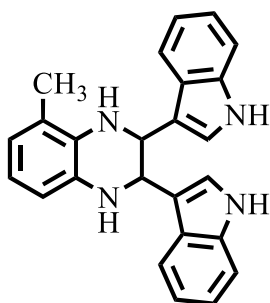

Prepared according to the general procedure (3c) mentioned above in 30% yield (34.0mg), eluent (25-30% EtOAc/hexane) to afford an off white solid, mp= 188-190 °C.

$^1\text{H}$  NMR (600 MHz, DMSO- $d_6$ )  $\delta$  10.72 (d,  $J = 8.3$  Hz, 2H), 7.42 (dd,  $J = 17.8, 8.0$  Hz, 2H), 7.23 (d,  $J = 8.1$  Hz, 2H), 7.03 (dd,  $J = 8.7, 2.5$  Hz, 2H), 6.96 (td,  $J = 7.5, 3.7$  Hz, 2H), 6.83 (dt,  $J = 11.2, 7.3$  Hz, 2H), 6.46 (d,  $J = 7.4$  Hz, 1H), 6.35 (dt,  $J = 15.2, 7.4$  Hz, 2H), 5.60 (s, 1H), 4.91 (d,  $J = 6.4$  Hz, 1H), 4.77 (d,  $J = 7.1$  Hz, 1H), 4.53 (s, 1H), 2.02 (s, 3H).

$^{13}\text{C}$  NMR (151 MHz, DMSO- $d_6$ )  $\delta$  135.6, 133.7, 131.0, 129.2, 128.3, 127.4, 125.9, 125.9, 122.8, 122.7, 120.2, 119.9, 118.6, 118.4, 118.1, 117.7, 116.2, 115.6, 115.3, 110.9, 110.9, 110.8, 53.3, 52.3, 16.7.

IR ( $\text{cm}^{-1}$ ):  $\nu_{\text{max}}$ ; 3396, 3175, 3052, 1605, 1426, 1259, 1168, 735.

HRMS (ESI): calcd for  $\text{C}_{25}\text{H}_{22}\text{N}_4$   $[\text{M}+\text{Na}]^+$ : 417.1482; found 417.1475.

**Synthesis of 2,3-bis(5-methoxy-1H-indol-3-yl)-5-methyl-1,2,3,4-tetrahydroquinoxaline (4ai)**

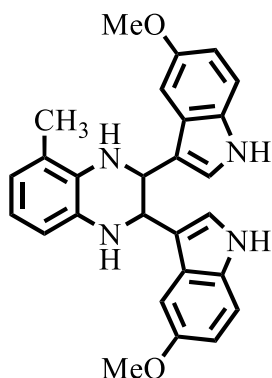

Prepared according to the general procedure (3c) mentioned above in 43% yield (56.5mg), eluent (25-30% EtOAc/hexane) to afford a white solid, mp= 130-132 °C.

**<sup>1</sup>H NMR (600 MHz, CDCl<sub>3</sub>)** δ 7.79 (s, 2H), 7.14 – 7.09 (m, 2H), 6.88 (d, *J* = 4.6 Hz, 3H), 6.82 (s, 1H), 6.75 (td, *J* = 9.3, 2.5 Hz, 2H), 6.61 (d, *J* = 6.7 Hz, 2H), 6.55 (dd, *J* = 6.9, 2.4 Hz, 1H), 4.92 (d, *J* = 7.9 Hz, 1H), 4.85 (d, *J* = 7.9 Hz, 1H), 3.57 (s, 3H), 3.54 (s, 2H), 2.16 (d, *J* = 11.6 Hz, 6H).

**<sup>13</sup>C NMR (151 MHz, CDCl<sub>3</sub>)** δ 153.9, 131.9, 131.3, 127.0, 123.4, 123.3, 120.2, 117.8, 116.4, 112.6, 112.0, 111.9, 111.8, 101.1, 101.0, 55.7, 55.4, 54.6, 30.9, 17.2.

**IR (cm<sup>-1</sup>):** ν<sub>max</sub> = 3378, 3141, 3041, 1611, 1420, 1344, 1254, 1199, 1162, 730.

**HRMS (ESI):** calcd for C<sub>27</sub>H<sub>24</sub>N<sub>4</sub>O<sub>2</sub> [M+Na]<sup>+</sup>: 461.1953; found 461.1978.

**Synthesis of 2,3-di(1H-indol-3-yl)-1,2,3,4-tetrahydroquinoxaline-6-carbonitrile (4aj)**

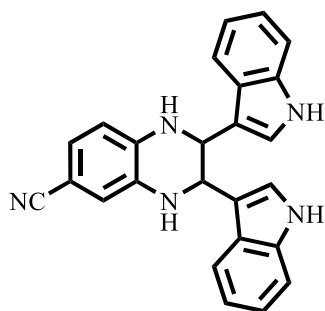

Prepared according to the general procedure (3c) mentioned above in 80% yield (93.4 mg), eluent (25% EtOAc/hexane) to afford a off white solid, mp= 130-132 °C.

**<sup>1</sup>H NMR (500 MHz, DMSO-*d*<sub>6</sub>)** δ 10.82 (s, 2H), 7.43 (dd, *J* = 14.5, 8.0 Hz, 2H), 7.26 (dd, *J* = 8.2, 2.9 Hz, 2H), 7.08 (dd, *J* = 5.1, 2.5 Hz, 2H), 6.99 (qd, *J* = 6.9, 1.2 Hz, 2H), 6.92 – 6.78

(m, 5H), 6.63 (d,  $J = 7.9$  Hz, 1H), 6.19 (s, 1H), 4.94 (d,  $J = 7.4$  Hz, 1H), 4.78 (d,  $J = 7.5$  Hz, 1H).

$^{13}\text{C}$  NMR (126 MHz, DMSO- $d_6$ )  $\delta$  139.5, 136.6, 136.5, 134.5, 126.7, 126.5, 124.1, 124.0, 122.7, 121.9, 121.3, 121.3, 119.4, 118.9, 118.9, 115.0, 114.8, 114.7, 112.1, 111.9, 111.8, 96.3, 53.7, 52.2.

IR ( $\text{cm}^{-1}$ ):  $\nu_{\text{max}} = 3302, 3142, 3062, 2235, 1507, 1230, 1120, 733$

HRMS (ESI): calcd for  $\text{C}_{25}\text{H}_{19}\text{N}_5$   $[\text{M}+\text{Na}]^+$ : 412.1538; found 412.1545

### Synthesis of 5,6-dihydrodiindolo[3,2-a:2',3'-c] phenazine (5aa)

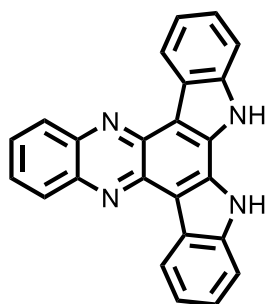

Prepared according to the general procedure (3d) mentioned above in 86% yield (30.8mg), eluent (25-30% EtOAc/hexane) to afford a reddish brown solid, mp= 380-382 °C.

$^1\text{H}$  NMR (600 MHz, DMSO- $d_6$ )  $\delta$  12.01 (s, 2H), 9.10 (d,  $J = 7.1$  Hz, 2H), 8.41 (dd,  $J = 6.3, 3.4$  Hz, 2H), 7.92 – 7.88 (m, 4H), 7.50 – 7.44 (m, 4H).

$^{13}\text{C}$  NMR (151 MHz, DMSO- $d_6$ )  $\delta$  139.9, 139.4, 137.8, 129.7, 128.5, 128.0, 124.6, 124.0, 122.1, 121.0, 112.3, 111.8.

IR ( $\text{cm}^{-1}$ ):  $\nu_{\text{max}}$ ; 3159, 3041, 1623, 1584, 1123, 711.

HRMS (ESI): calcd for  $\text{C}_{24}\text{H}_{14}\text{N}_4$   $[\text{M}+\text{Na}]^+$ : 381.1116; found 381.1109.

### Synthesis of 2,9-dimethoxy-5,6-dihydroindolo[3,2-a:2',3'-c] phenazine (5ab)

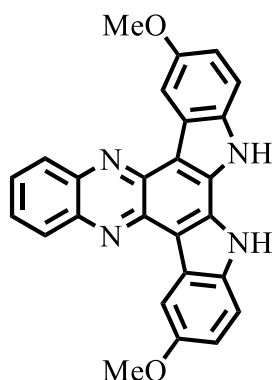

Prepared according to the general procedure (3d) mentioned above in 67% yield (28.0mg), eluent (25-30% EtOAc/hexane) to afford a reddish brown solid, mp= 300-302 °C.

**<sup>1</sup>H NMR (600 MHz, DMSO-*d*<sub>6</sub>)** δ 11.82 (s, 2H), 8.59 (d, *J* = 2.5 Hz, 2H), 8.38 (dd, *J* = 6.3, 3.4 Hz, 2H), 7.87 (dd, *J* = 6.8, 3.4 Hz, 2H), 7.77 (d, *J* = 8.7 Hz, 2H), 7.11 (dd, *J* = 8.7, 2.7 Hz, 2H), 3.99 (s, 6H).

**<sup>13</sup>C NMR (151 MHz, DMSO-*d*<sub>6</sub>)** δ 155.3, 140.7, 139.7, 133.2, 130.7, 129.1, 128.3, 125.8, 113.9, 113.6, 111.9, 104.7, 55.8.

**IR (cm<sup>-1</sup>):** ν<sub>max</sub>; 3114, 3039, 1613, 1555, 1204, 1140, 717.

**HRMS (ESI):** calcd for C<sub>24</sub>H<sub>18</sub>N<sub>4</sub>O<sub>2</sub> [M+H]<sup>+</sup>: 419.1508; found 419.1519.

### Synthesis of 1,20-dihydrobenzo [5,6] indolo[3,2-a] benzo [5,6] indolo[2,3-c] phenazine (5ac)

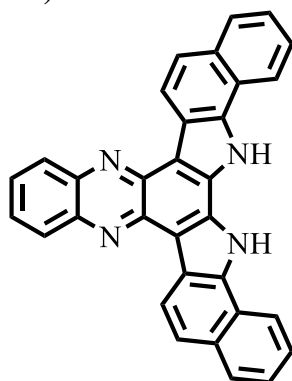

Prepared according to the general procedure (3d) mentioned above in 58% yield (26.6mg), eluent (25-30% EtOAc/hexane) to afford a reddish brown solid, mp= 308-310 °C.

**<sup>1</sup>H NMR (600 MHz, DMSO-*d*<sub>6</sub>)** δ 12.63 (s, 2H), 9.17 (d, *J* = 8.6 Hz, 2H), 8.44 – 8.41 (m, 4H), 8.14 (d, *J* = 8.0 Hz, 2H), 7.93 – 7.90 (m, 4H), 7.77 (t, *J* = 7.4 Hz, 2H), 7.61 (t, *J* = 7.4 Hz, 2H).

**<sup>13</sup>C NMR (151 MHz, DMSO-*d*<sub>6</sub>)** δ 141.0, 140.2, 133.5, 131.5, 129.4, 129.2, 128.9, 126.8, 125.5, 122.5, 122.1, 121.6, 121.1, 113.5.

**IR (cm<sup>-1</sup>):** ν<sub>max</sub>; 3155, 3054, 1619, 1562, 1140, 705.

**HRMS (ESI):** calcd for C<sub>32</sub>H<sub>18</sub>N<sub>4</sub> [M+Na]<sup>+</sup>: 481.1429; found 481.1440.

**Synthesis of 12-methyl-5,6-dihydrodiindolo[3,2-*a*:2',3'-*c*] Phenazine (5ad)**

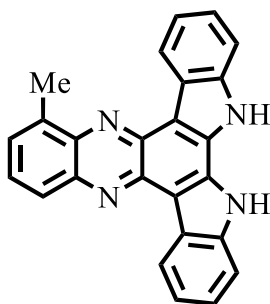

Prepared according to the general procedure (3d) mentioned above in 75% yield (27.9mg), eluent (25-30% EtOAc/hexane) to afford a reddish brown solid. mp= 304-306 °C.

**<sup>1</sup>H NMR (600 MHz, DMSO-*d*<sub>6</sub>)** δ 11.98 (d, *J* = 6.6 Hz, 2H), 9.10 – 9.02 (m, 2H), 8.23 (d, *J* = 8.4 Hz, 1H), 7.90 – 7.87 (m, 2H), 7.80 – 7.75 (m, 2H), 7.49 – 7.42 (m, 4H), 3.07 (s, 3H).

**<sup>13</sup>C NMR (151 MHz, DMSO-*d*<sub>6</sub>)** δ 140.2, 139.3, 138.6, 136.8, 130.3, 128.5, 127.3, 125.4, 124.7, 122.9, 122.8, 121.9, 121.8, 113.1, 113.0, 18.0.

**IR (cm<sup>-1</sup>):** ν<sub>max</sub>; 3126, 3070, 1649, 1530, 1402, 1103, 698

**HRMS (ESI):** calcd for C<sub>25</sub>H<sub>16</sub>N<sub>4</sub> [M+Na]<sup>+</sup>: 395.1273; found.395.1255

## 5. Mechanistic studies:

### 5a. The Radical scavenging experiment in the presence of (2,2,6,6 Tetramethylpiperidin-1-yl) oxyl (TEMPO)

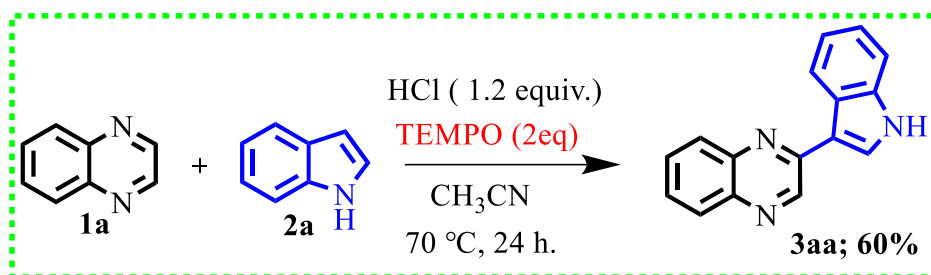

The reaction was performed with 39.0 mg of **1a** (0.3mmol), 35.1 mg of **2a** (0.3mmol), and 93.7 mg of TEMPO (0.6mmol) added into the oven dried clean reaction tube, in acetonitrile (1mL), after that 26  $\mu$ l of HCl was added dropwise into the reaction mixture at room temperature, and the reaction mixture stirred in an oil bath at 70 °C up to 24 hrs, our desired product observed in 60% yield.

### 5b. The radical scavenging experiment in the presence of 3,5-Di-tert-4-butylhydroxytoluene (BHT)

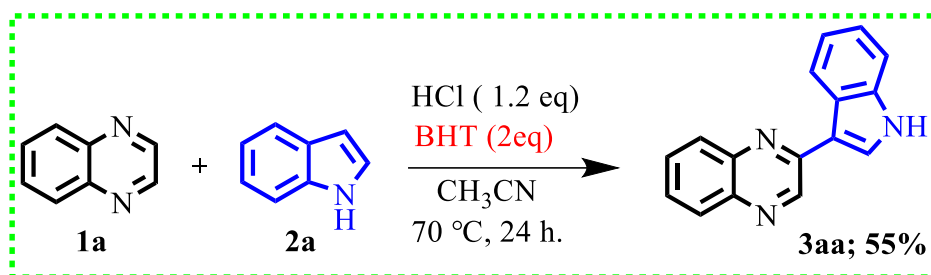

The reaction was performed with 39.0 mg of **1a** (0.3mmol), 35.1 mg of **2a** (0.3mmol), and 132.2 mg of BHT (0.6mmol) added in to the oven dried clean reaction tube, in acetonitrile,(1mL) after that 26  $\mu$ l of HCl was added dropwise into the reaction mixture at room temperature, and the reaction mixture stirred in an oil bath at 70 °C up to 24 hrs, our desired product observed less than 55%.

## 5c. Intermediate detected by HRMS

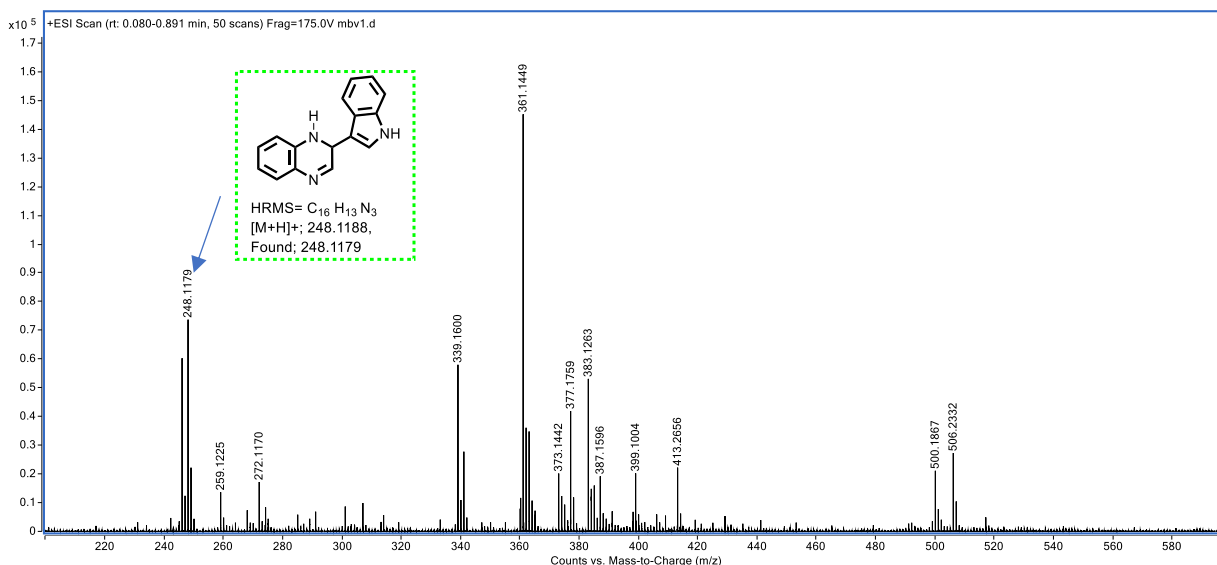

Fig.S2: Spectra of HRMS

## 5d. Mechanism of oxidative cyclisation of 4aa

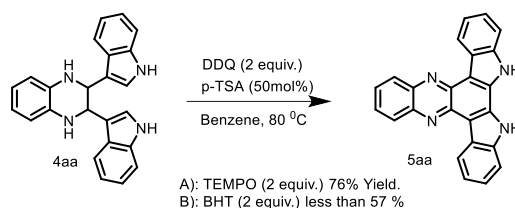

Based on control experiments and literature reports,<sup>6</sup> we proposed a two plausible reaction mechanisms Path-A and B (Scheme S1). Initially, **4aa** in presence of p-TSA, generates intermediate **A**, and its oxidation generates another intermediate **B**. Intermediate **B**, under similar conditions may provide stable intermediate **C**, which was isolated and confirmed by NMR. In presence of acid, intermediate **C** will generate carbocationic intermediate **D** and its reaction with DDQ will generate another intermediate **E**. Finally aromatisation of **E** give the desired product **5aa**.<sup>6</sup> Through Path-B, **4aa** may directly transformed to **5aa** by DDQ through oxidative cyclisation as per the reported literature.<sup>6</sup>

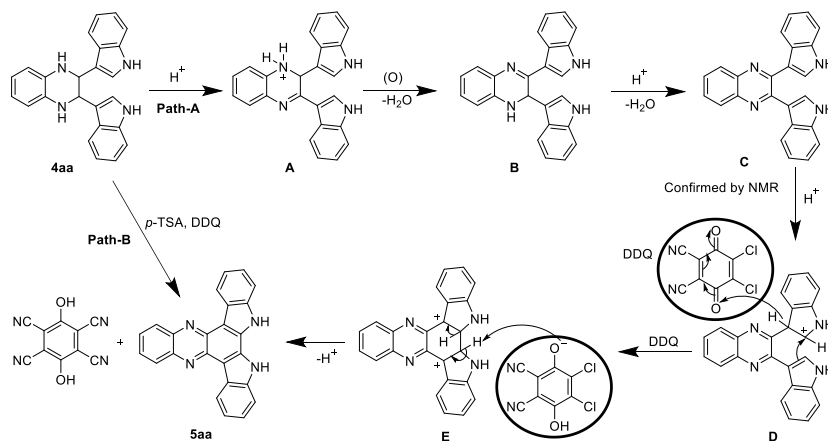

Scheme S1: Plausible mechanism

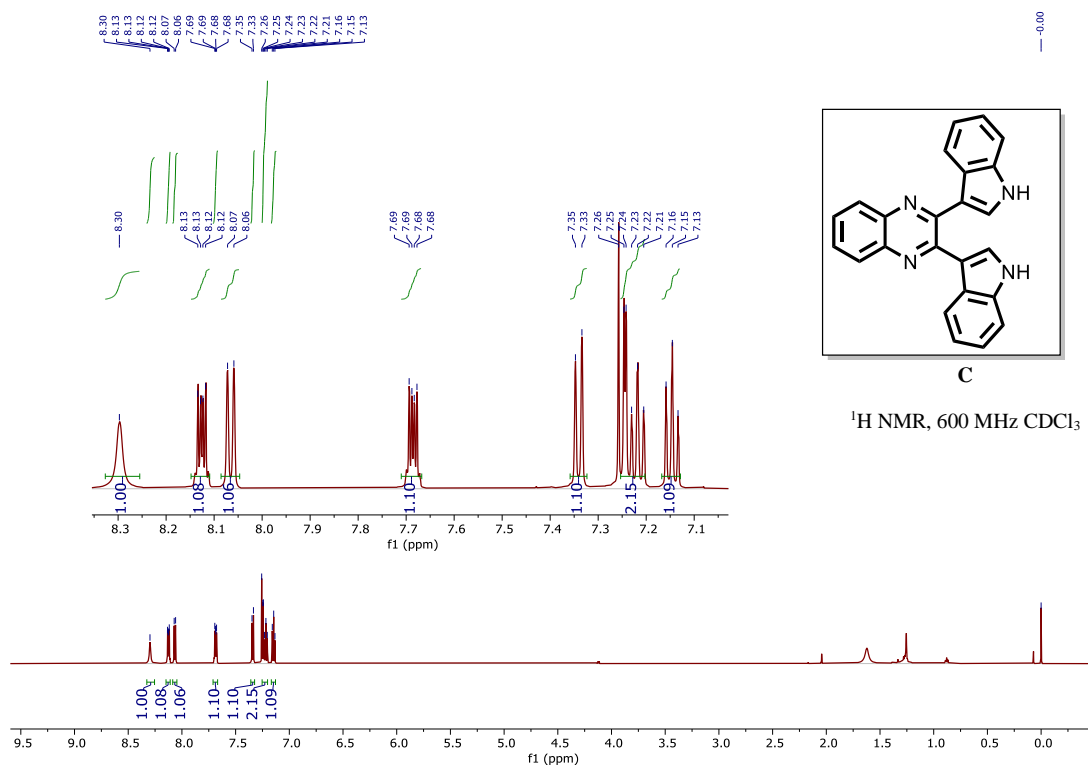

$^1\text{H NMR}$  of Intermediate C

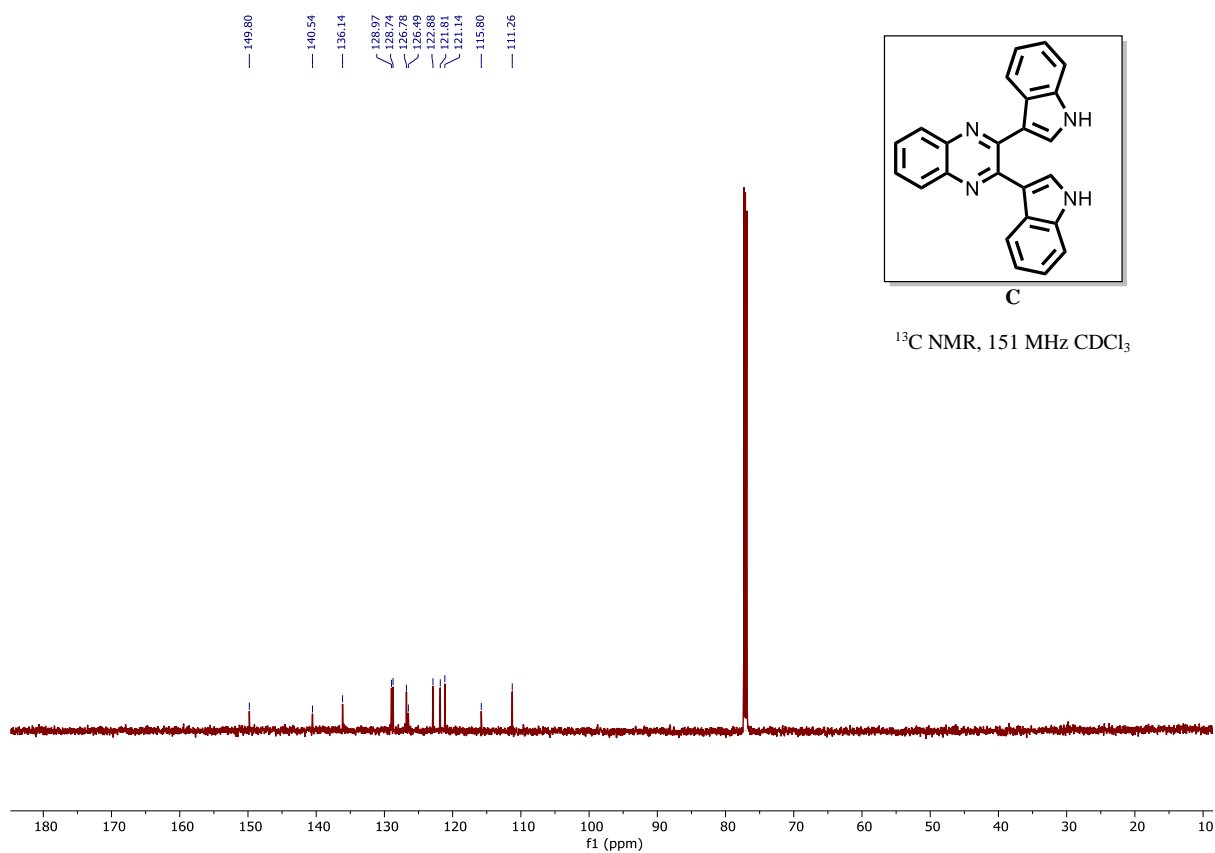

$^{13}\text{C NMR}$  of Intermediate C



## 6. X-ray Structure and Data

### 6a. Procedure for the crystal growth

15–20 mg of the pure substance was taken and diluted in 1-2 mL of solvent (hexane and ethyl acetate) in a glass vial (5 mL), it was kept for slow evaporation at room temperature. After 2-3 days small crystals were begun to form. X-ray diffraction data were collected on a Bruker Kappa Apex-II CCD diffractometer at 296 K.

**Table S8: Crystal Data and Refinement Parameters (Experimental: X-ray part).**

| Identification code              | <b>4aa</b>        | <b>3au</b>                                    |
|----------------------------------|-------------------|-----------------------------------------------|
| Empirical formula                | $C_{24}H_{20}N_4$ | $C_{23}H_{17}N_3O$                            |
| Formula weight                   | 364.44            | 351.39                                        |
| Temperature/K                    | 298               | 298                                           |
| Crystal system                   | triclinic         | orthorhombic                                  |
| Space group                      | P-1               | P2 <sub>1</sub> 2 <sub>1</sub> 2 <sub>1</sub> |
| a/Å                              | 9.2942(8)         | 9.6588(4)                                     |
| b/Å                              | 10.9020(8)        | 13.5399(5)                                    |
| c/Å                              | 11.0378(9)        | 14.1363(5)                                    |
| $\alpha/^\circ$                  | 62.717(3)         | 90                                            |
| $\beta/^\circ$                   | 71.571(4)         | 90                                            |
| $\gamma/^\circ$                  | 89.138(3)         | 90                                            |
| Volume/Å <sup>3</sup>            | 931.76(13)        | 1848.73(12)                                   |
| Z                                | 2                 | 4                                             |
| $\rho_{\text{calc}}/\text{cm}^3$ | 1.299             | 1.262                                         |
| $\mu/\text{mm}^{-1}$             | 0.079             | 0.079                                         |
| F(000)                           | 384.0             | 736.0                                         |

|                                                  |                                                                        |                                                                        |
|--------------------------------------------------|------------------------------------------------------------------------|------------------------------------------------------------------------|
| Crystal size/mm <sup>3</sup>                     | 0.13 × 0.12 × 0.08                                                     | 0.29 × 0.2 × 0.06                                                      |
| Radiation                                        | MoK $\alpha$ ( $\lambda = 0.71073$ )                                   | MoK $\alpha$ ( $\lambda = 0.71073$ )                                   |
| 2 $\Theta$ range for data collection/ $^{\circ}$ | 4.254 to 50                                                            | 4.166 to 66.486                                                        |
| Index ranges                                     | -11 $\leq$ h $\leq$ 11, -12 $\leq$ k $\leq$ 12, -13 $\leq$ l $\leq$ 13 | -14 $\leq$ h $\leq$ 14, -20 $\leq$ k $\leq$ 20, -21 $\leq$ l $\leq$ 21 |
| Reflections collected                            | 45073                                                                  | 165909                                                                 |
| Independent reflections                          | 3266 [ $R_{\text{int}} = 0.0938$ , $R_{\text{sigma}} = 0.0364$ ]       | 7107 [ $R_{\text{int}} = 0.1160$ , $R_{\text{sigma}} = 0.0409$ ]       |
| Data/restraints/parameters                       | 3266/0/253                                                             | 7107/0/244                                                             |
| Goodness-of-fit on $F^2$                         | 1.086                                                                  | 1.071                                                                  |
| Final R indexes [ $I \geq 2\sigma(I)$ ]          | $R_1 = 0.0512$ , $wR_2 = 0.1322$                                       | $R_1 = 0.0447$ , $wR_2 = 0.1004$                                       |
| Final R indexes [all data]                       | $R_1 = 0.0831$ , $wR_2 = 0.1620$                                       | $R_1 = 0.0919$ , $wR_2 = 0.1301$                                       |
| Largest diff. peak/hole / $e \text{ \AA}^{-3}$   | 0.28/-0.27                                                             | 0.16/-0.23                                                             |
| CCDC                                             | <b>2408003</b>                                                         | <b>2410123</b>                                                         |

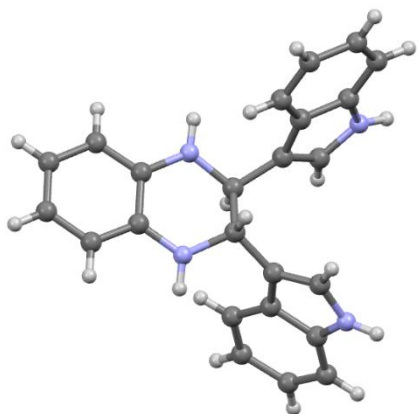

**4aa (CCDC 2408003)**

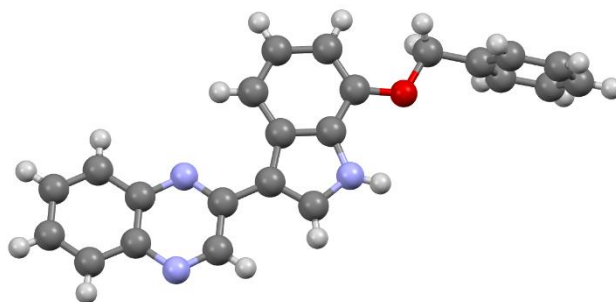

**3au (CCDC 2410123)**

**Fig. S3.** (a) Thermal ellipsoid plot for the crystal structure **4aa** (CCDC 2408003). (b) Thermal ellipsoid plot for the crystal structure **3au** (CCDC 2410123).

## **Copies of $^1\text{H}$ , $^{13}\text{C}$ & $^{19}\text{F}$ NMR**

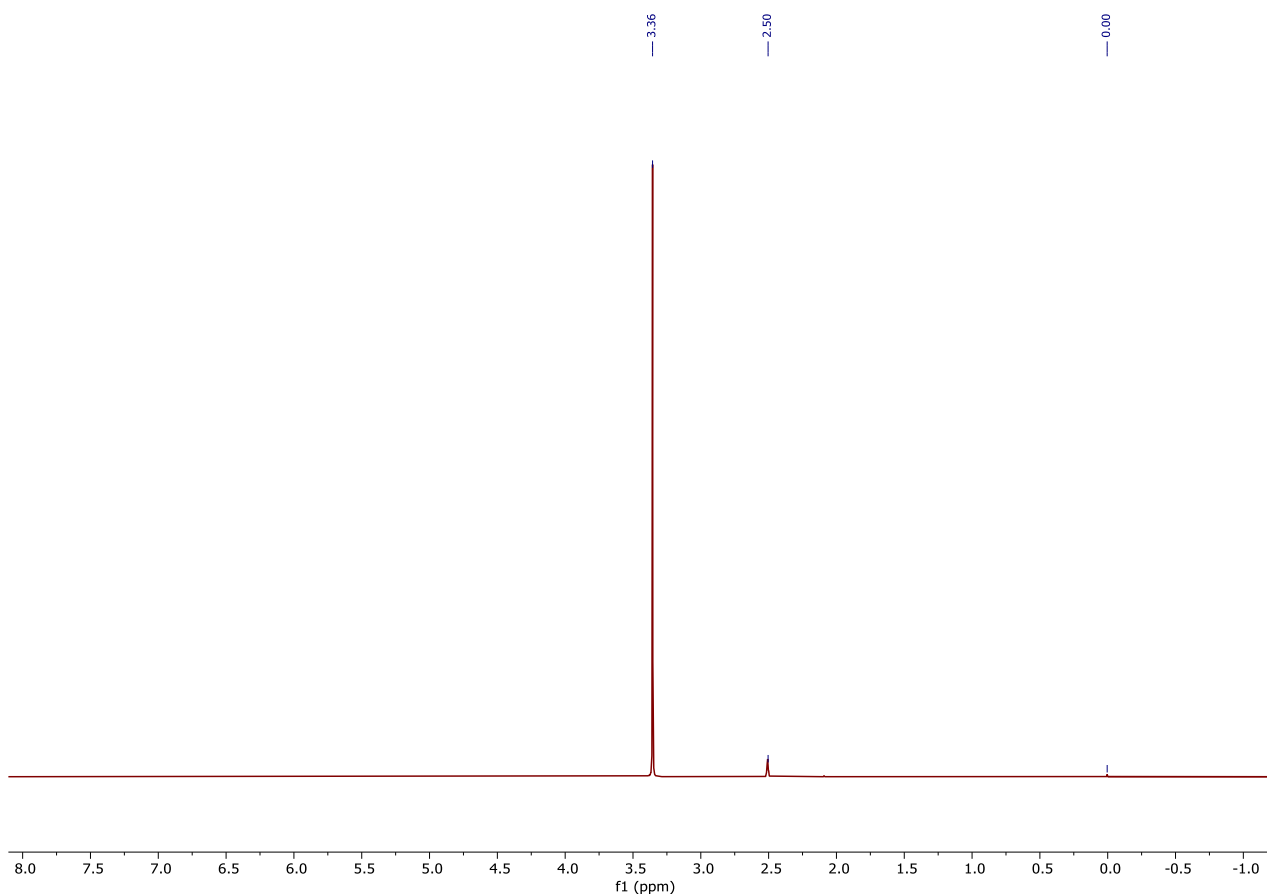

### <sup>1</sup>H NMR OF DMSO-d<sub>6</sub> (blank for reference)

The spectrum shows a characteristic water peak at 3.36 ppm and 2.50 ppm are attributed to residual water in the solvent (DMSO-d<sub>6</sub>). Hence these peaks appear in the spectra wherever DMSO is used as solvent for recording NMR and these peaks may be ignored during integration.

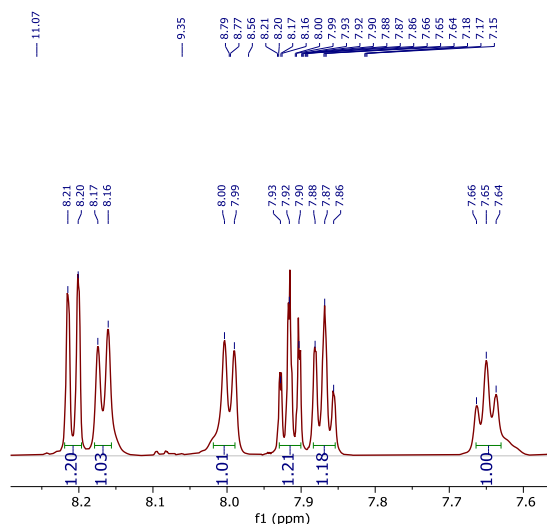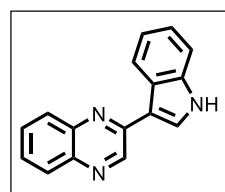

**3aa**

<sup>1</sup>H NMR, 600 MHz CDCl<sub>3</sub>

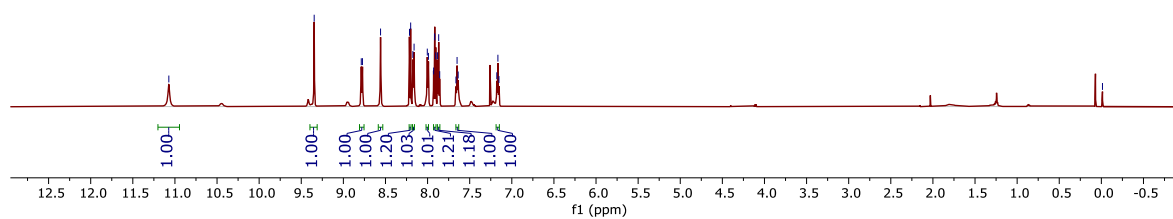

<sup>1</sup>H NMR of 3aa

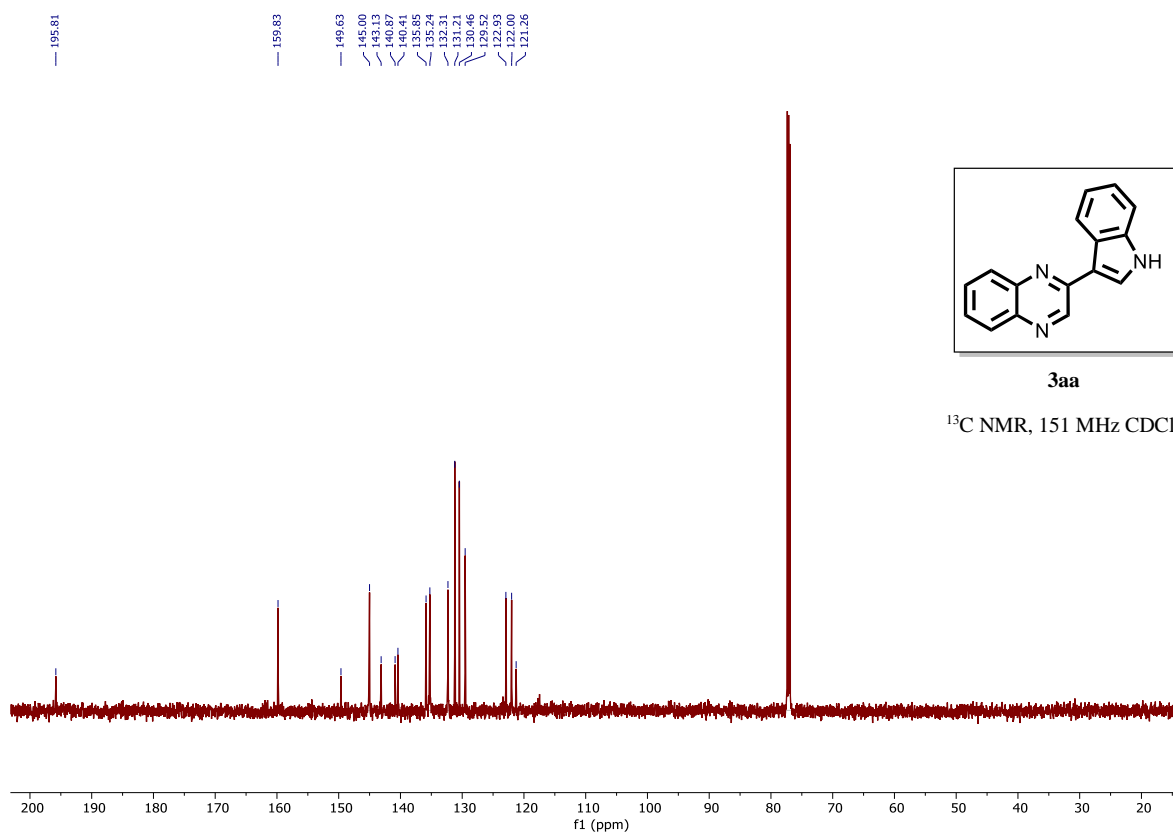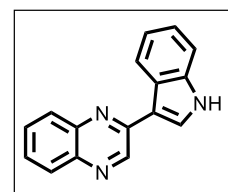

**3aa**

<sup>13</sup>C NMR, 151 MHz CDCl<sub>3</sub>

<sup>13</sup>C NMR of 3aa

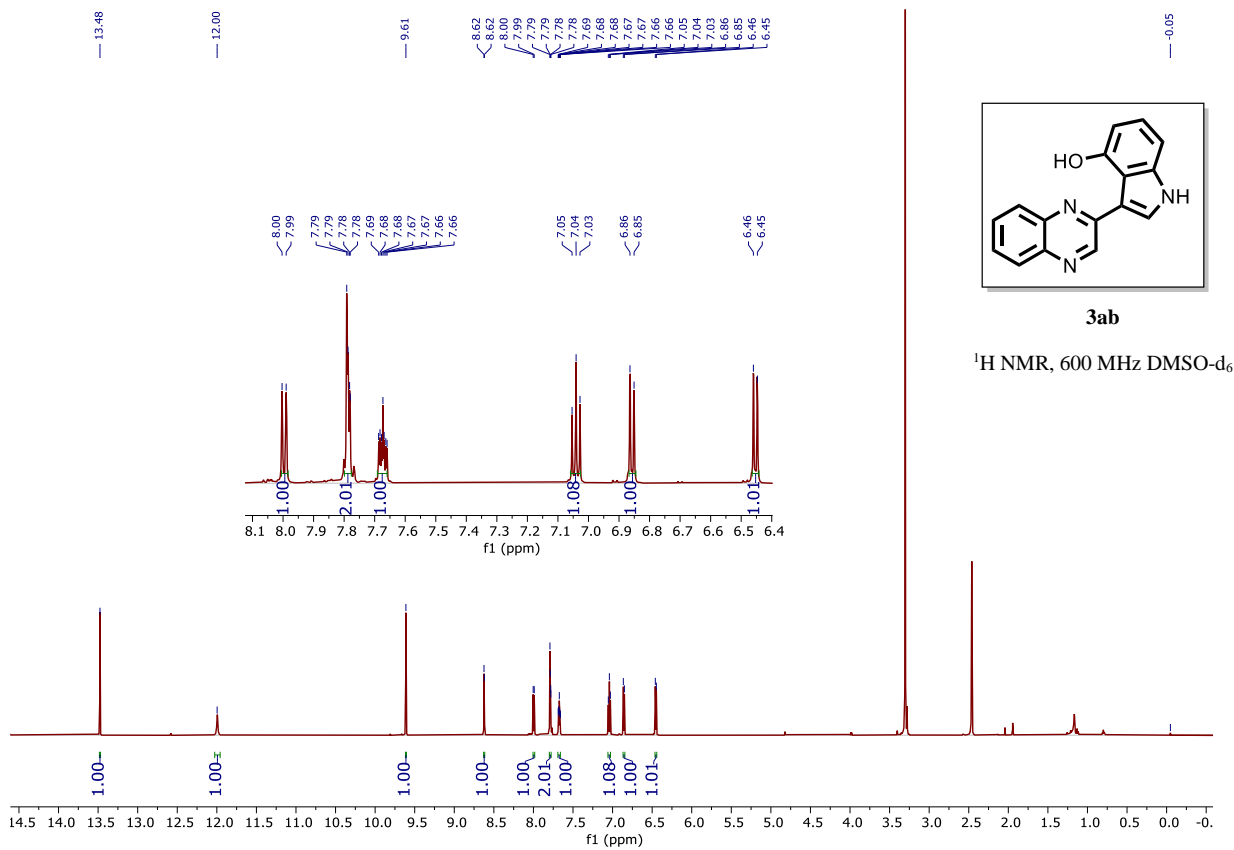

<sup>1</sup>H NMR of 3ab

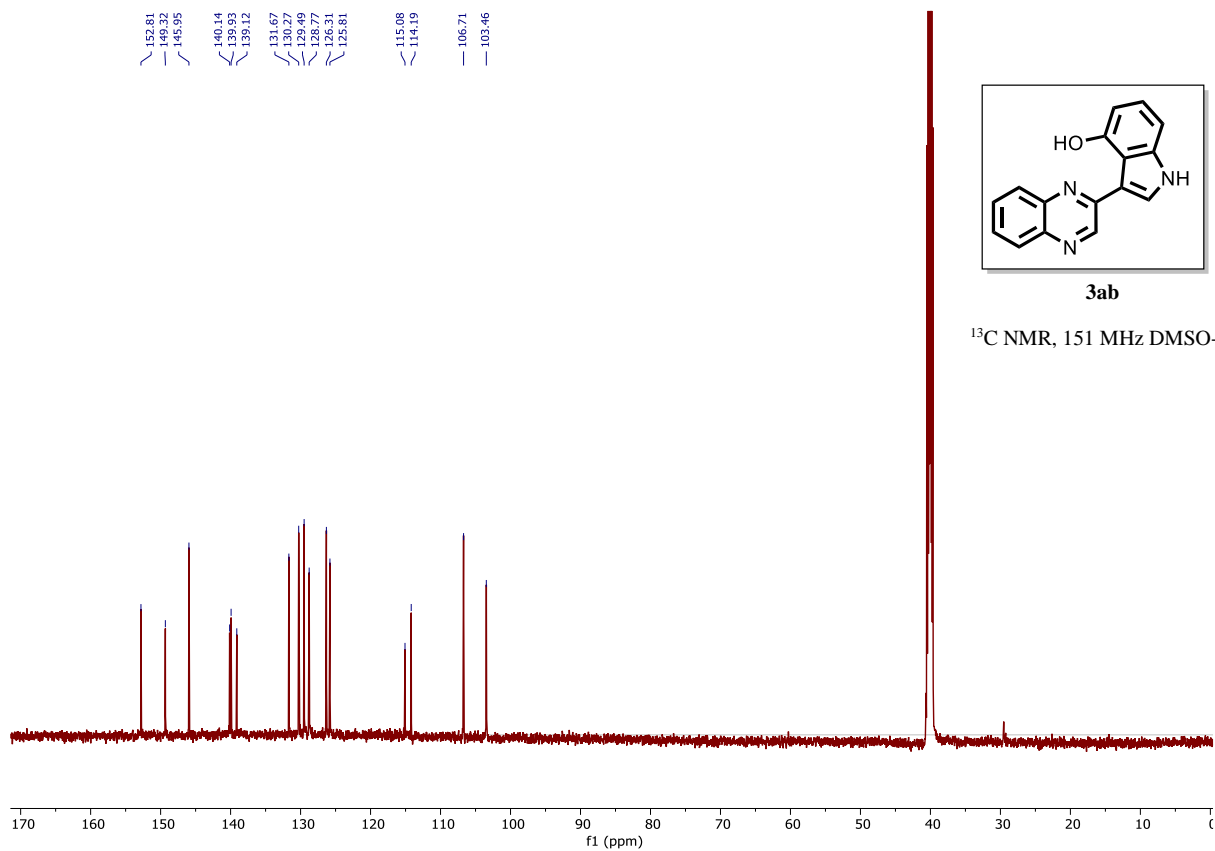

<sup>13</sup>C NMR of 3ab

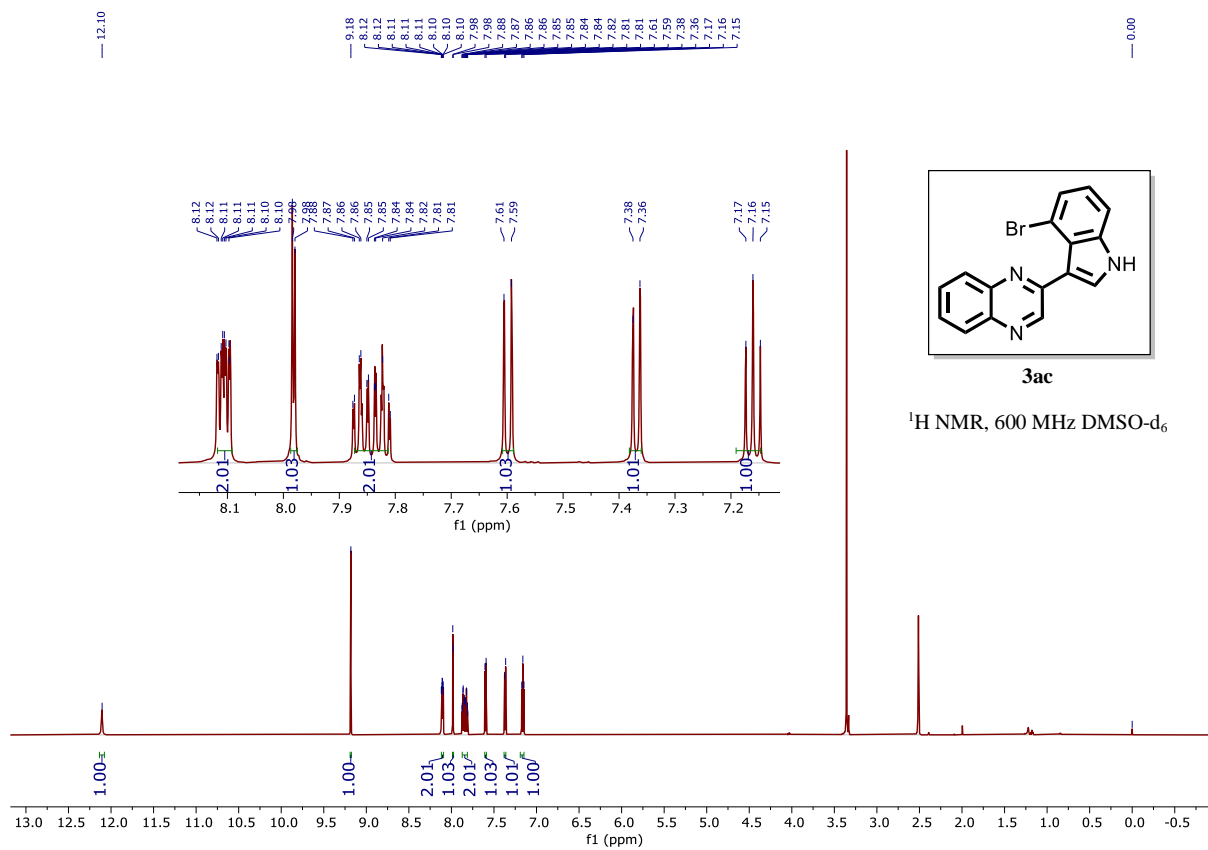

<sup>1</sup>H NMR of 3ac

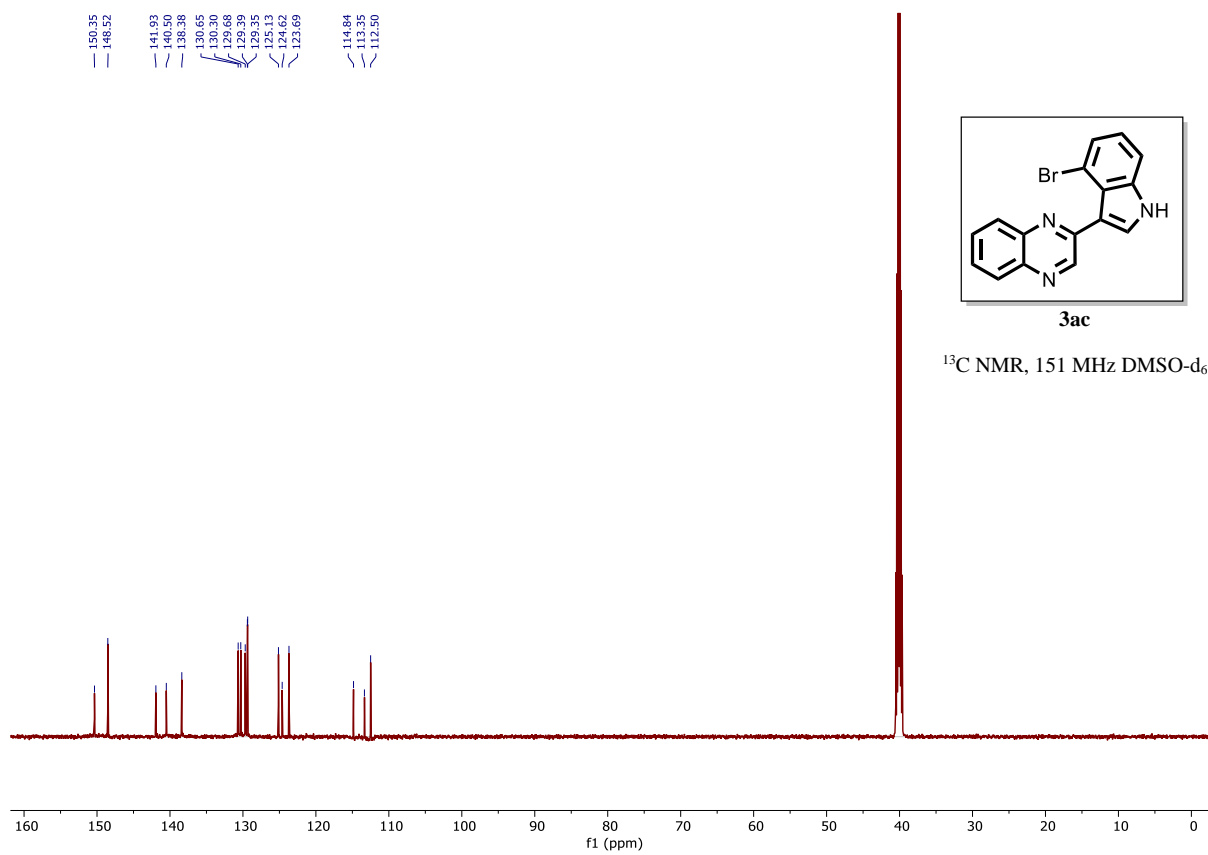

<sup>13</sup>C NMR of 3ac



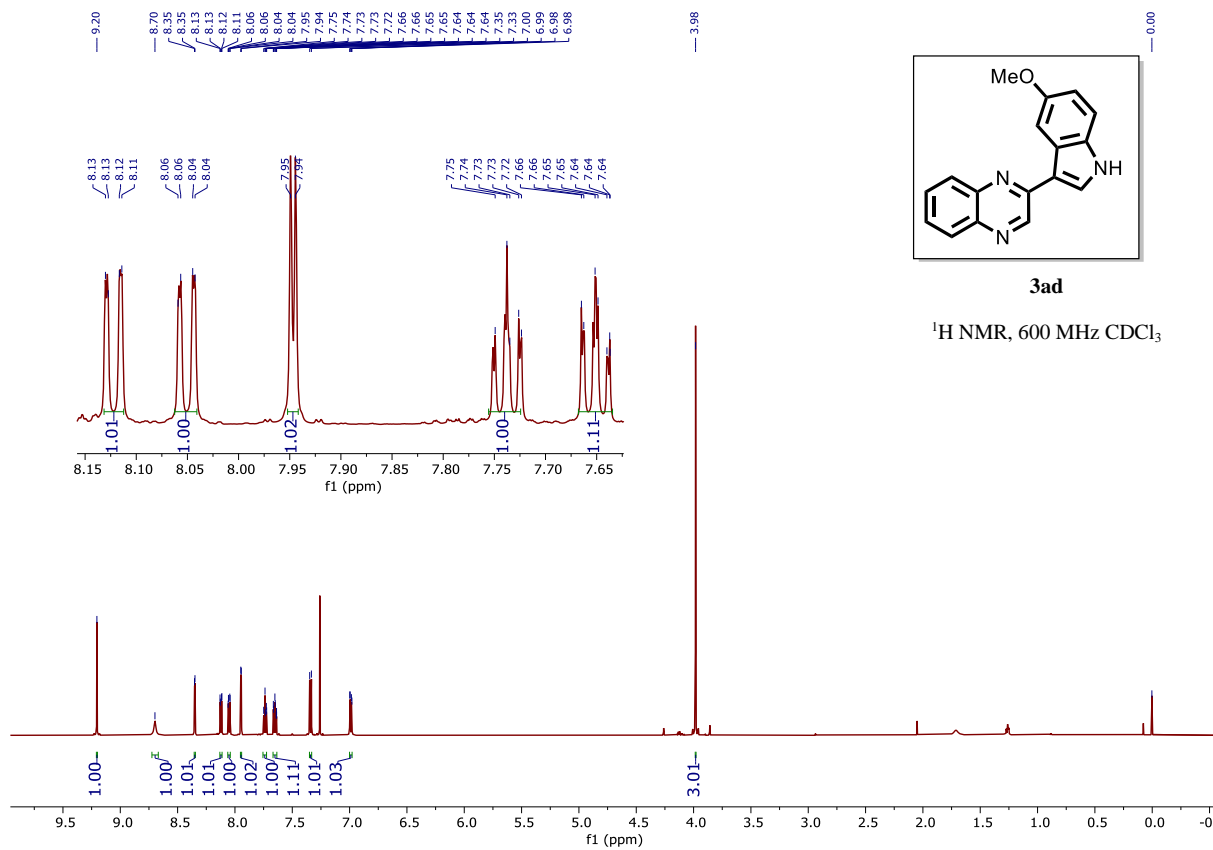

<sup>1</sup>H NMR of 3ad

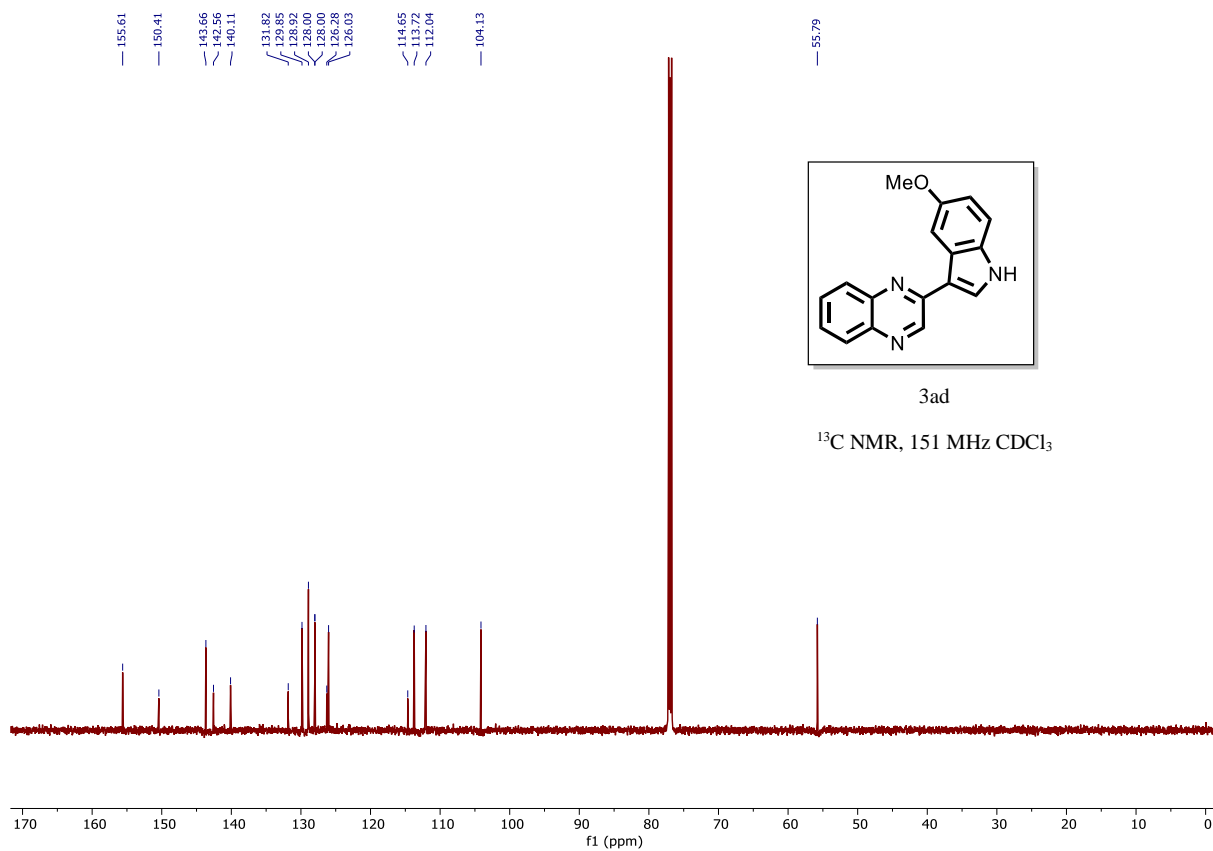

<sup>13</sup>C NMR of 3ad

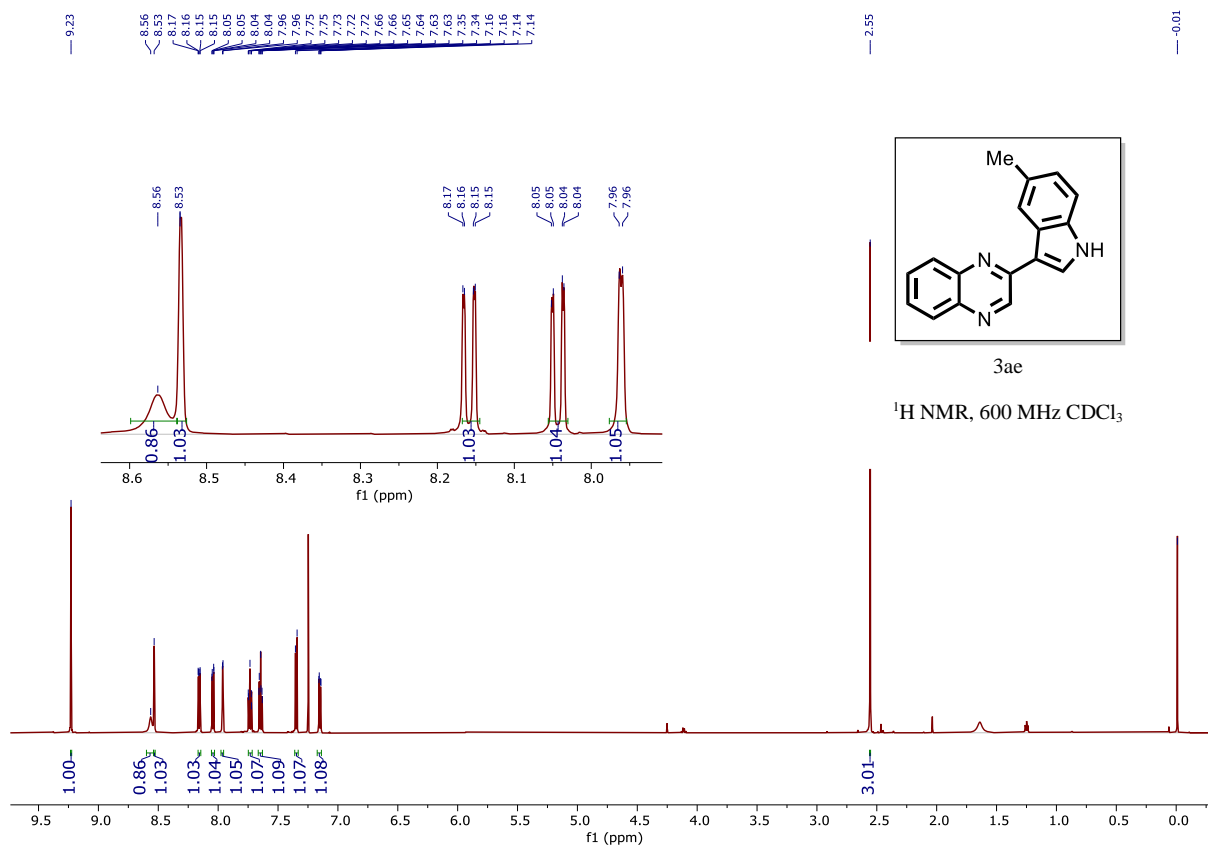

<sup>1</sup>H NMR of 3ae

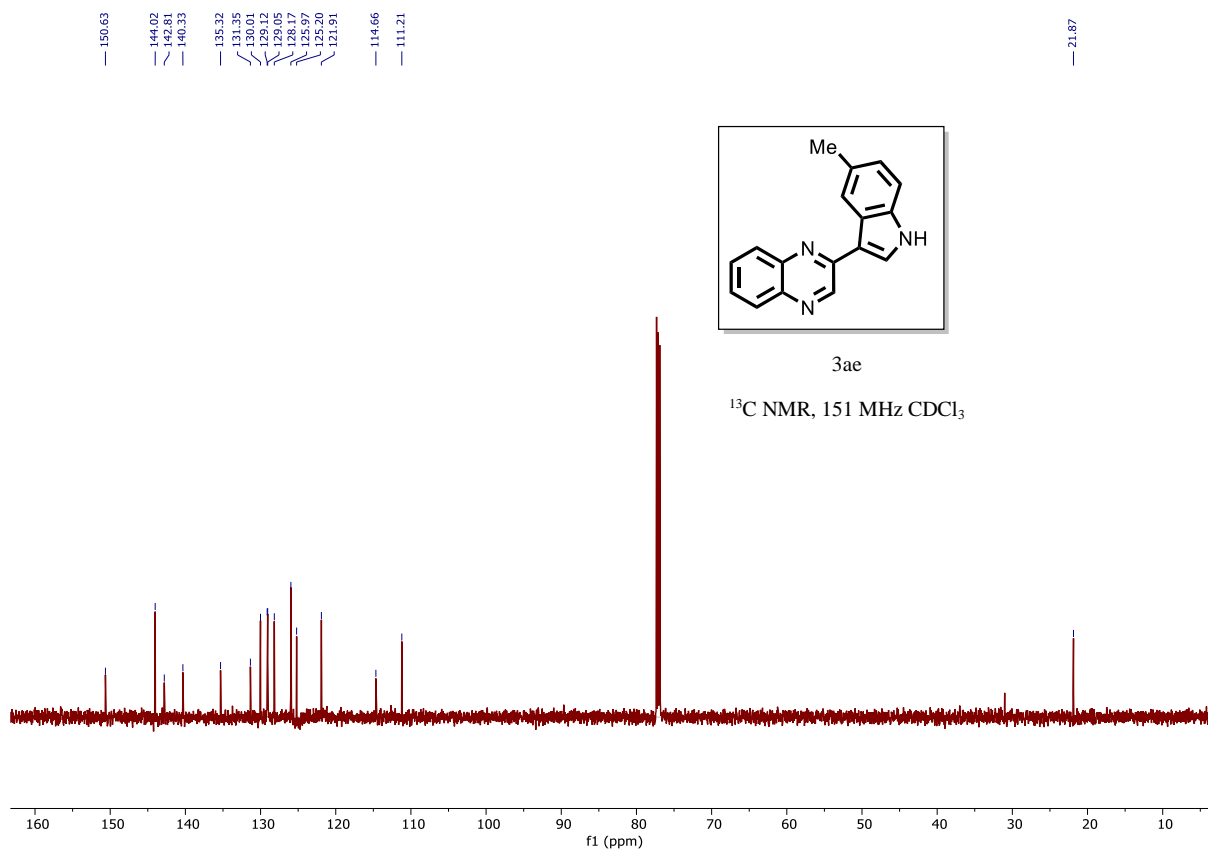

<sup>13</sup>C NMR of 3ae

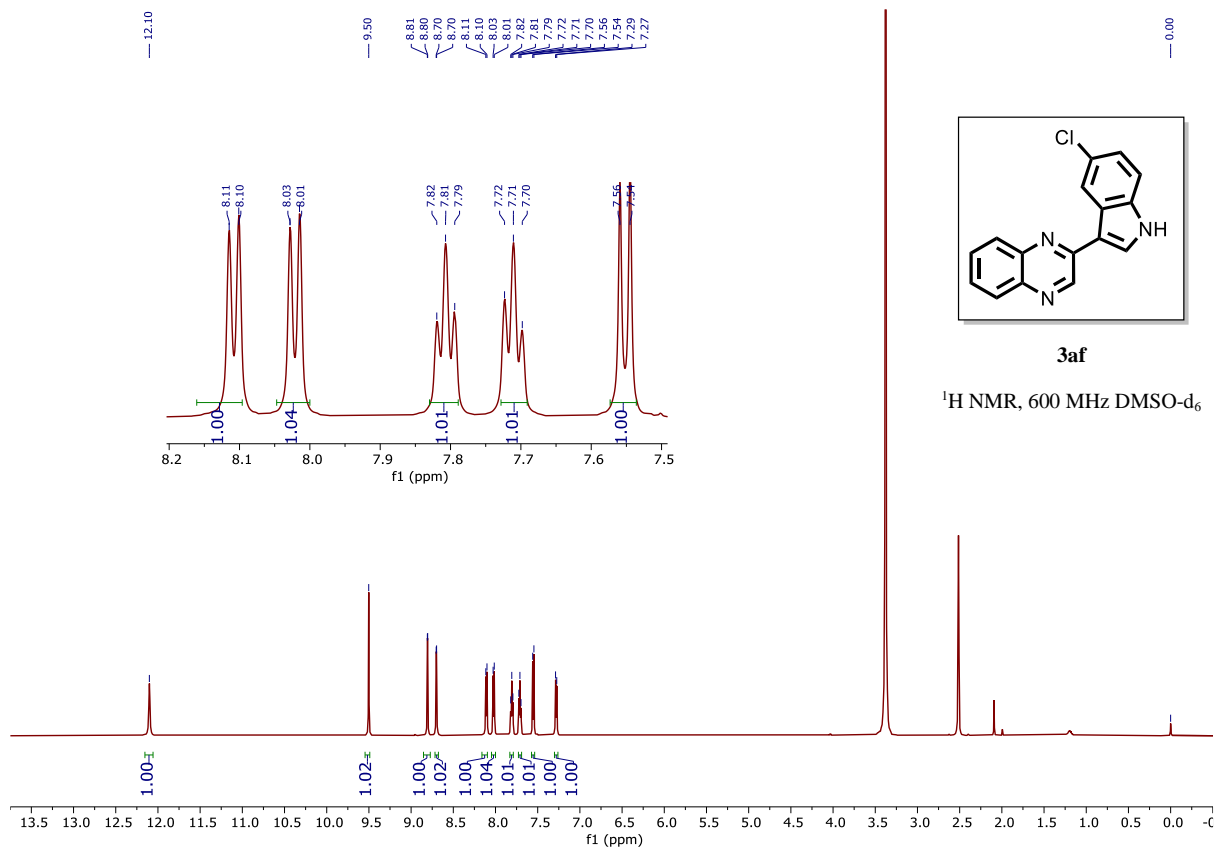

<sup>1</sup>H NMR of 3af

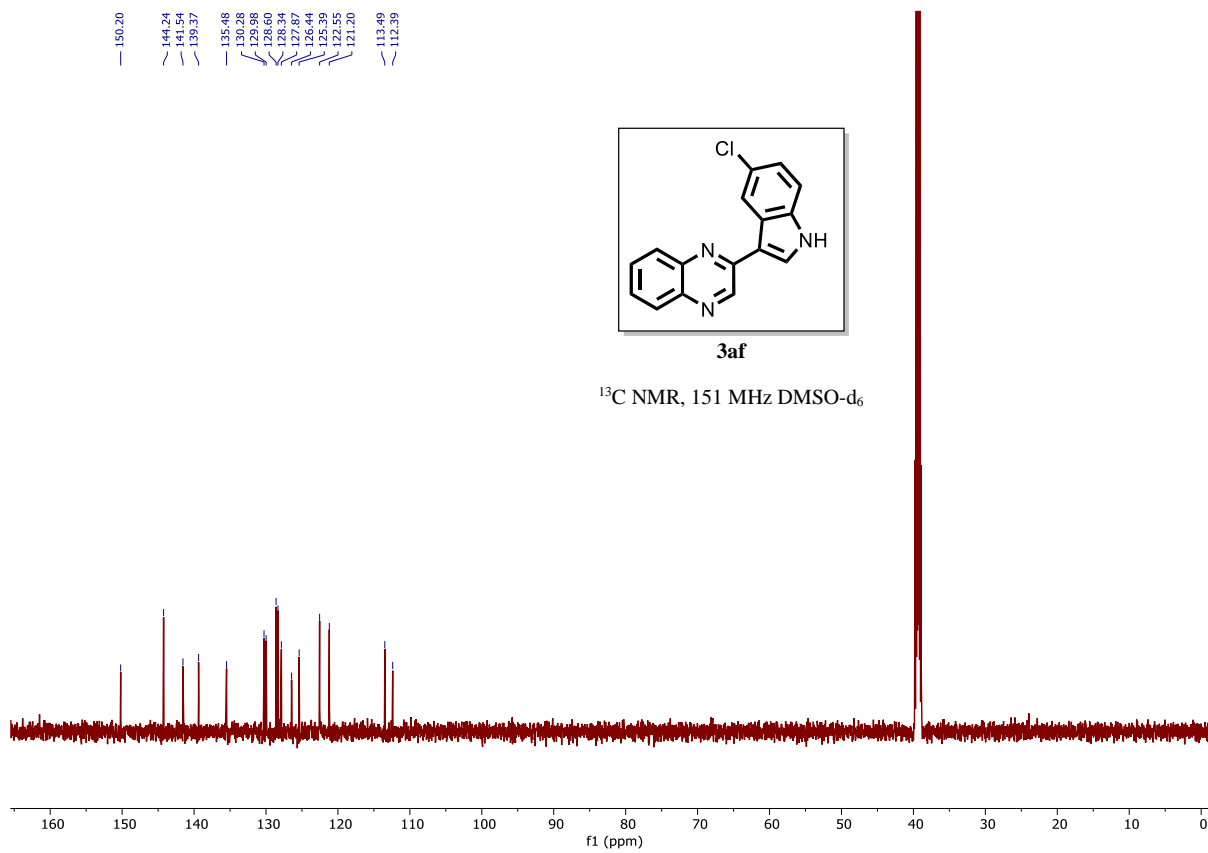

<sup>13</sup>C NMR of 3af

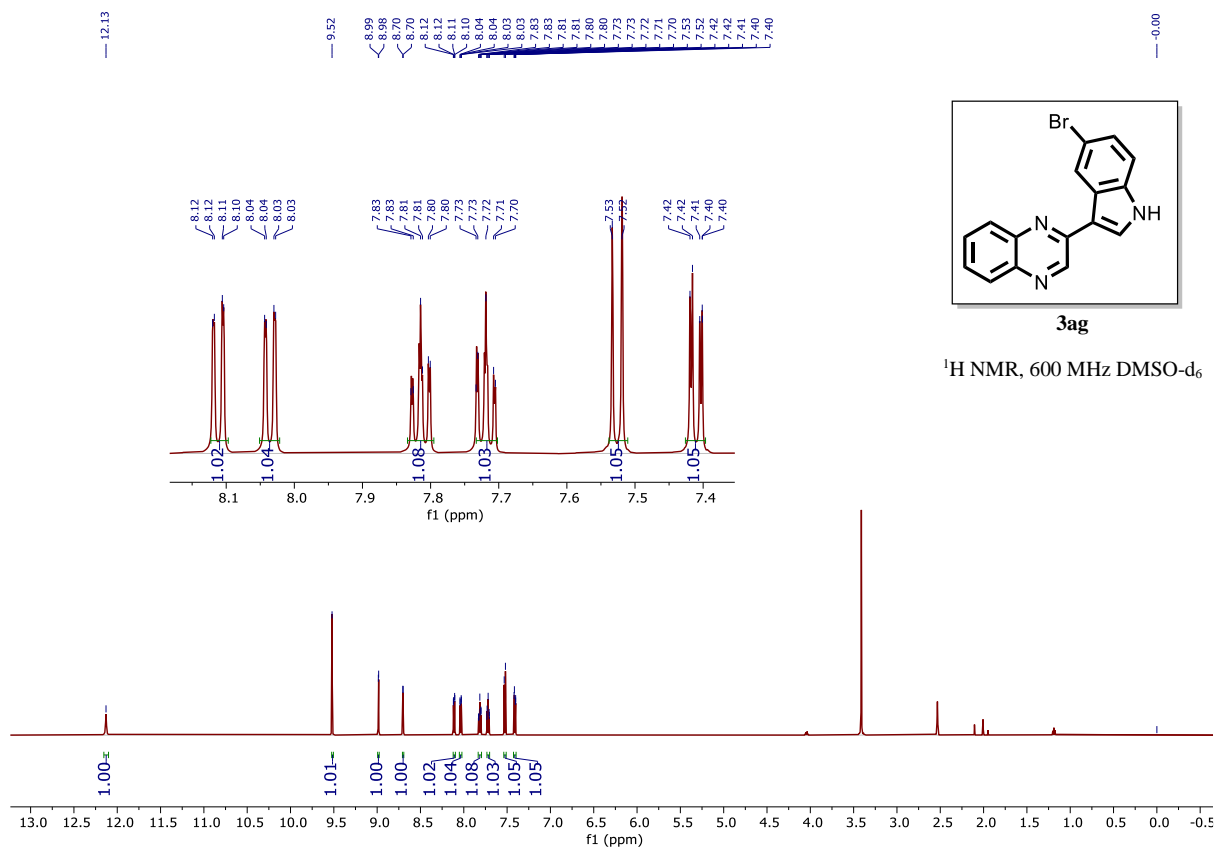

<sup>1</sup>H NMR of 3ag

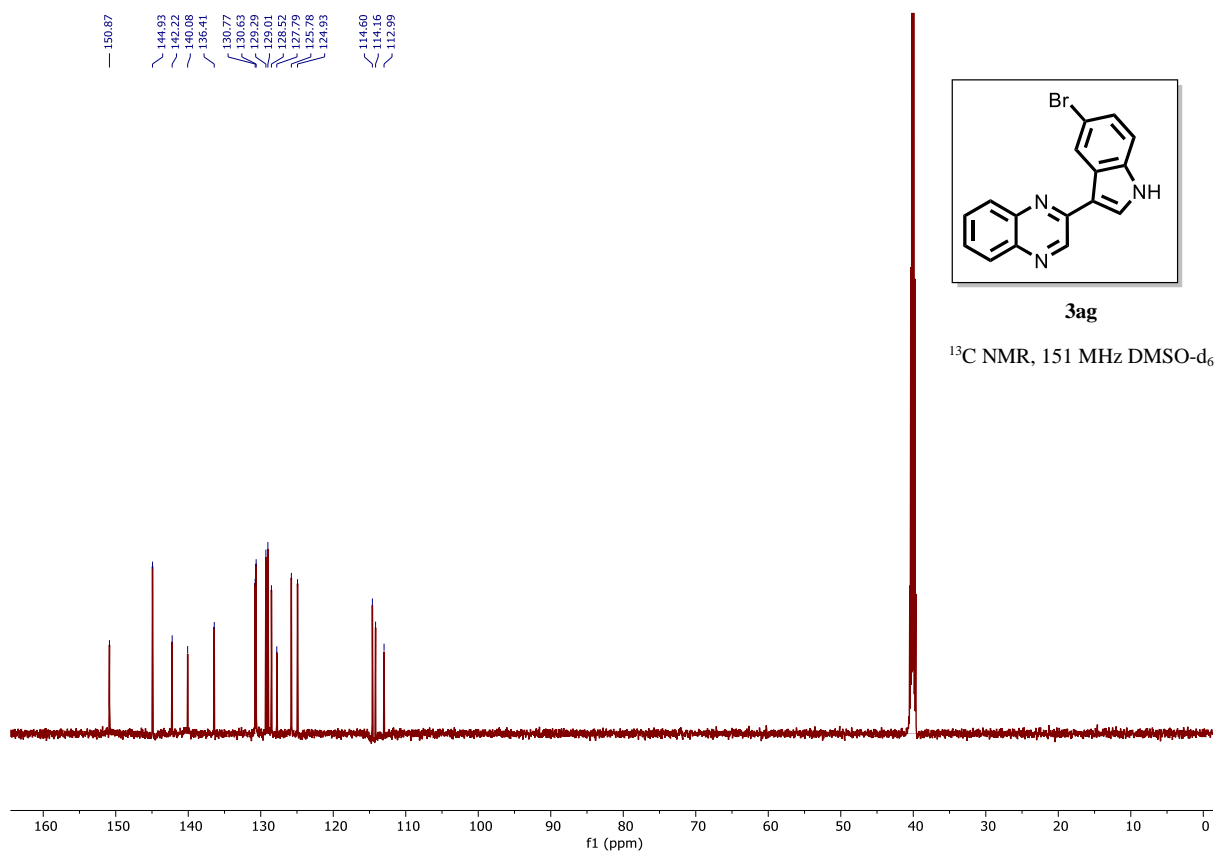

<sup>13</sup>C NMR of 3ag

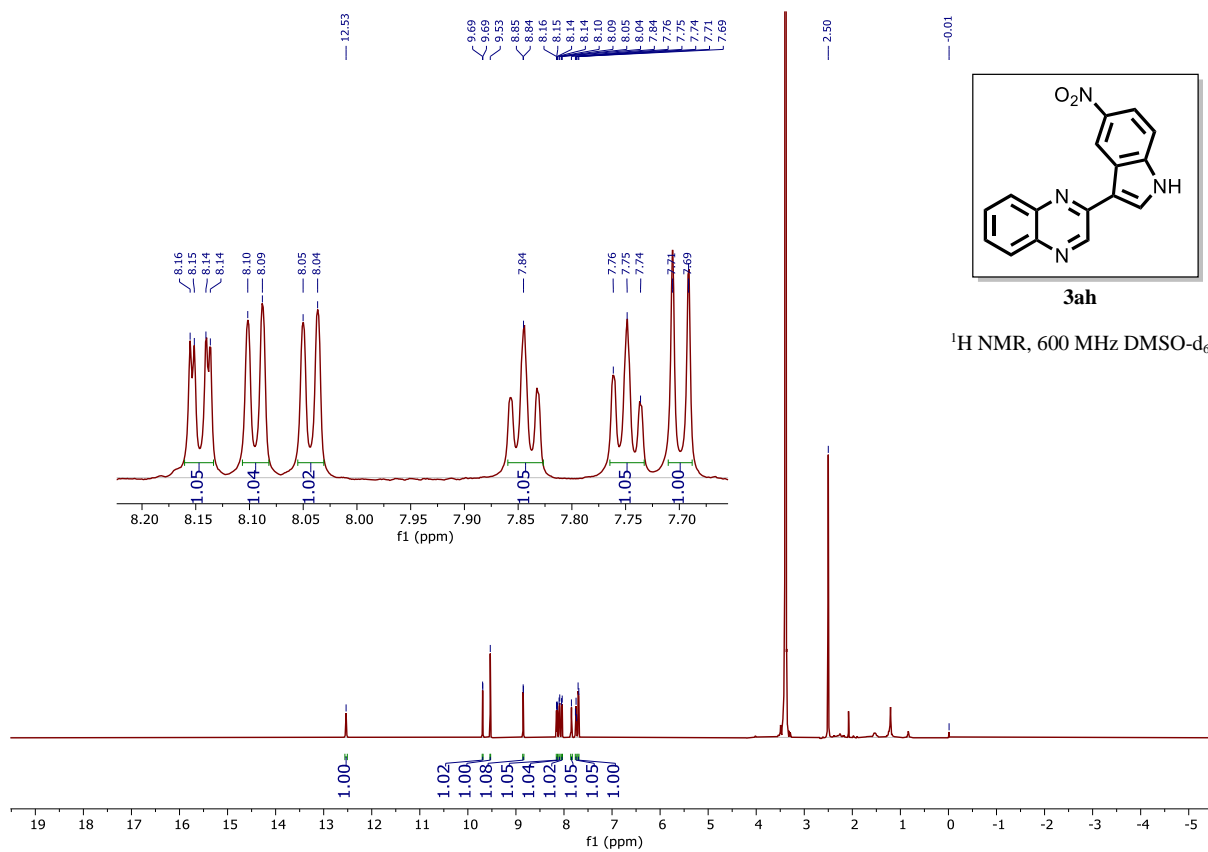

<sup>1</sup>H NMR of 3ah

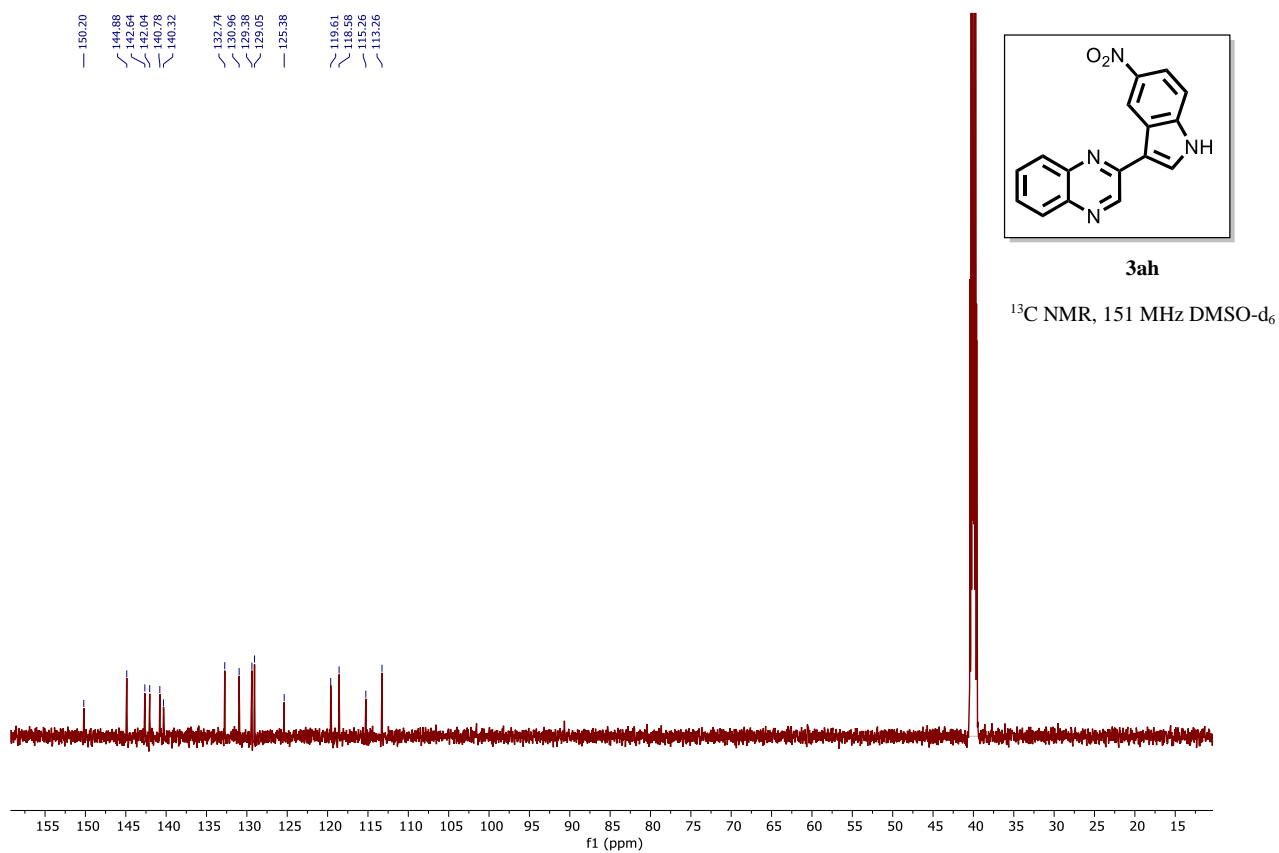

<sup>13</sup>C NMR of 3ah

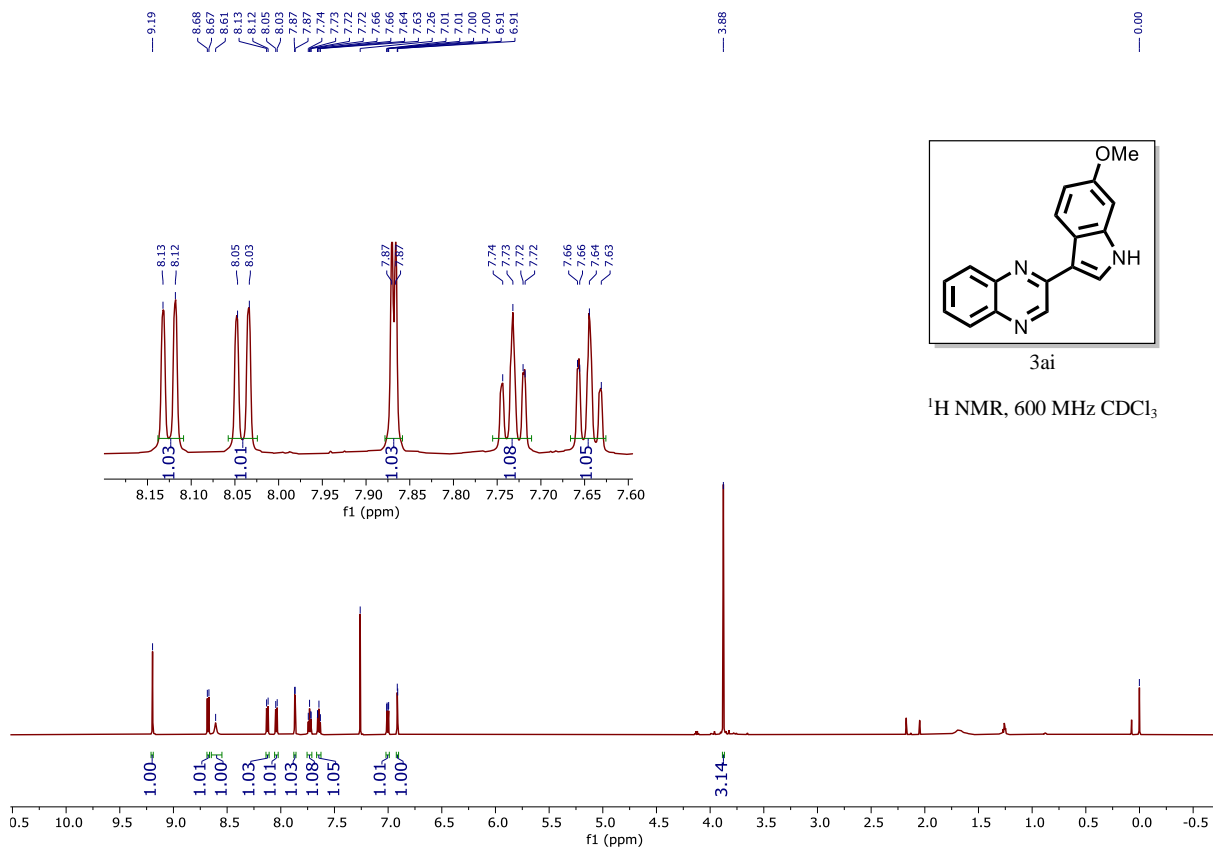

<sup>1</sup>H NMR of 3ai

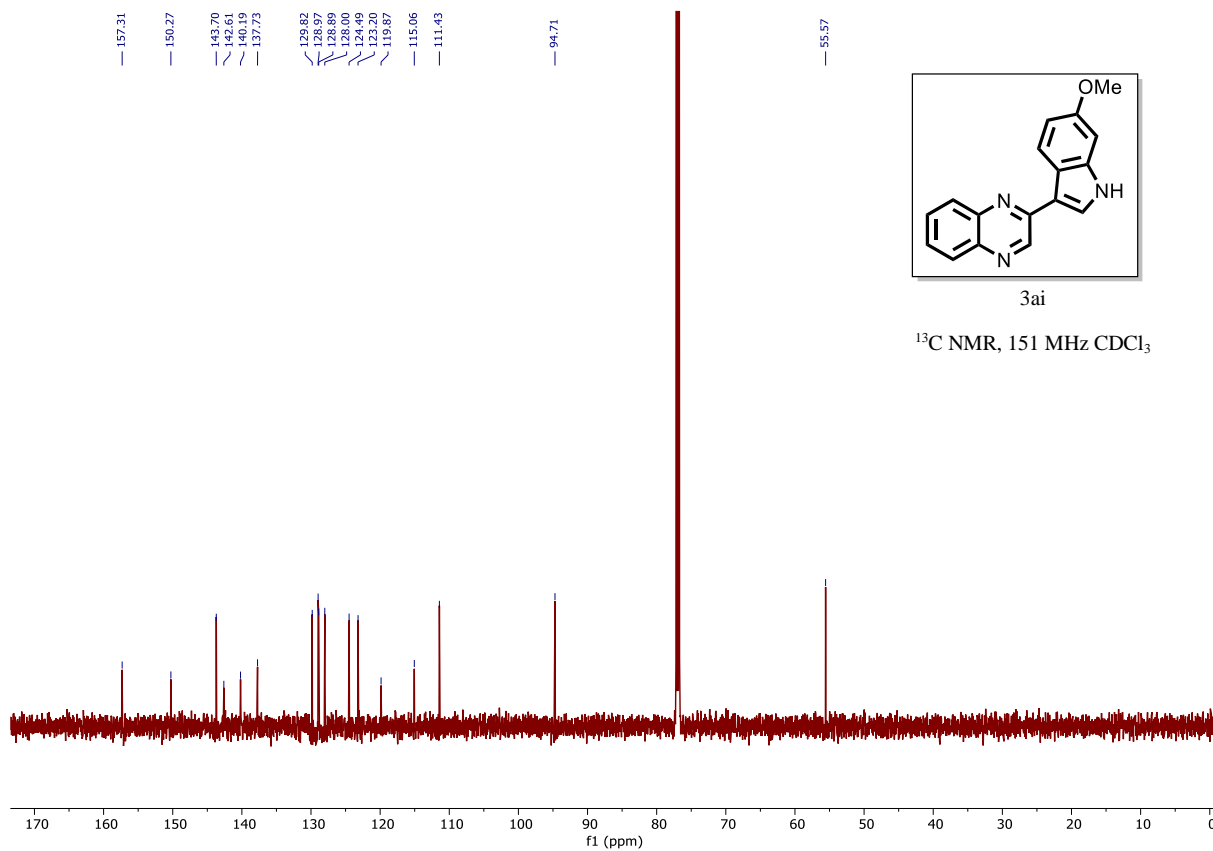

<sup>13</sup>C NMR of 3ai

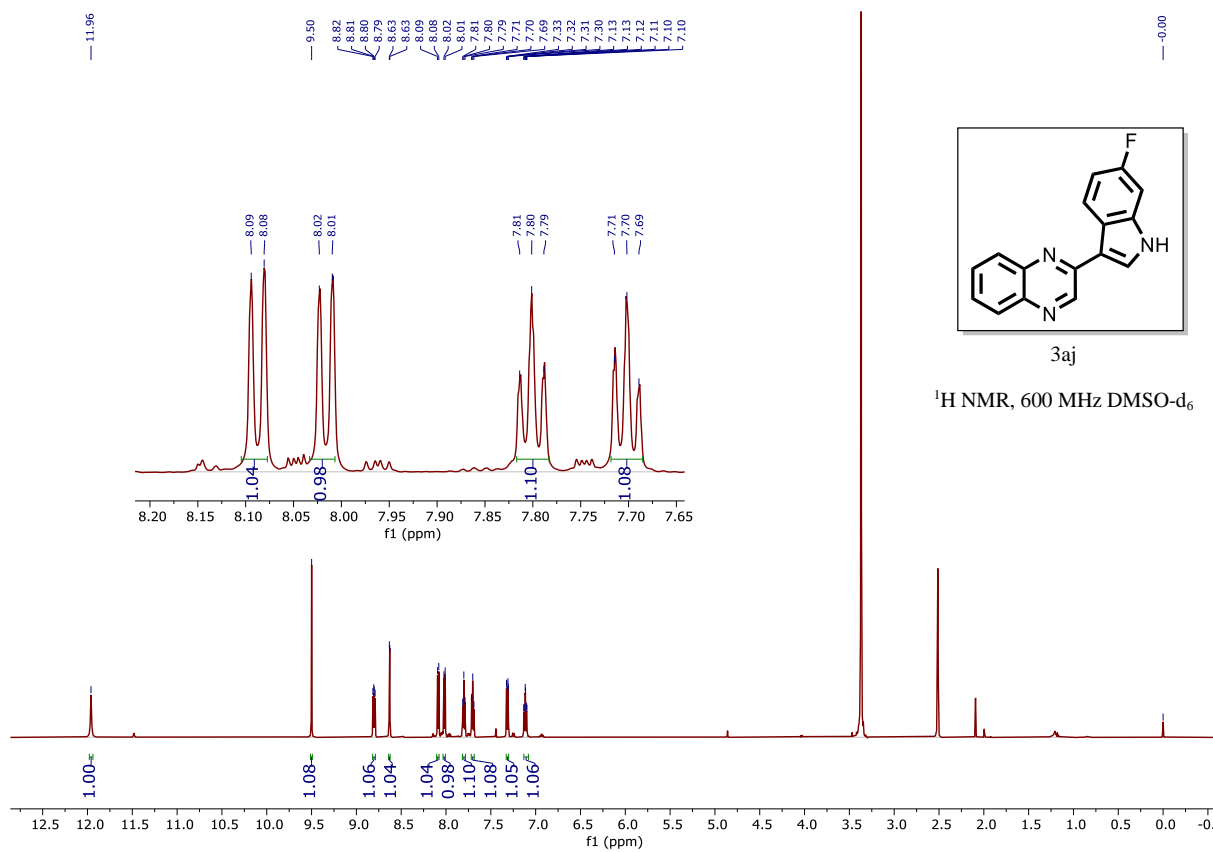

<sup>1</sup>H NMR of 3aj

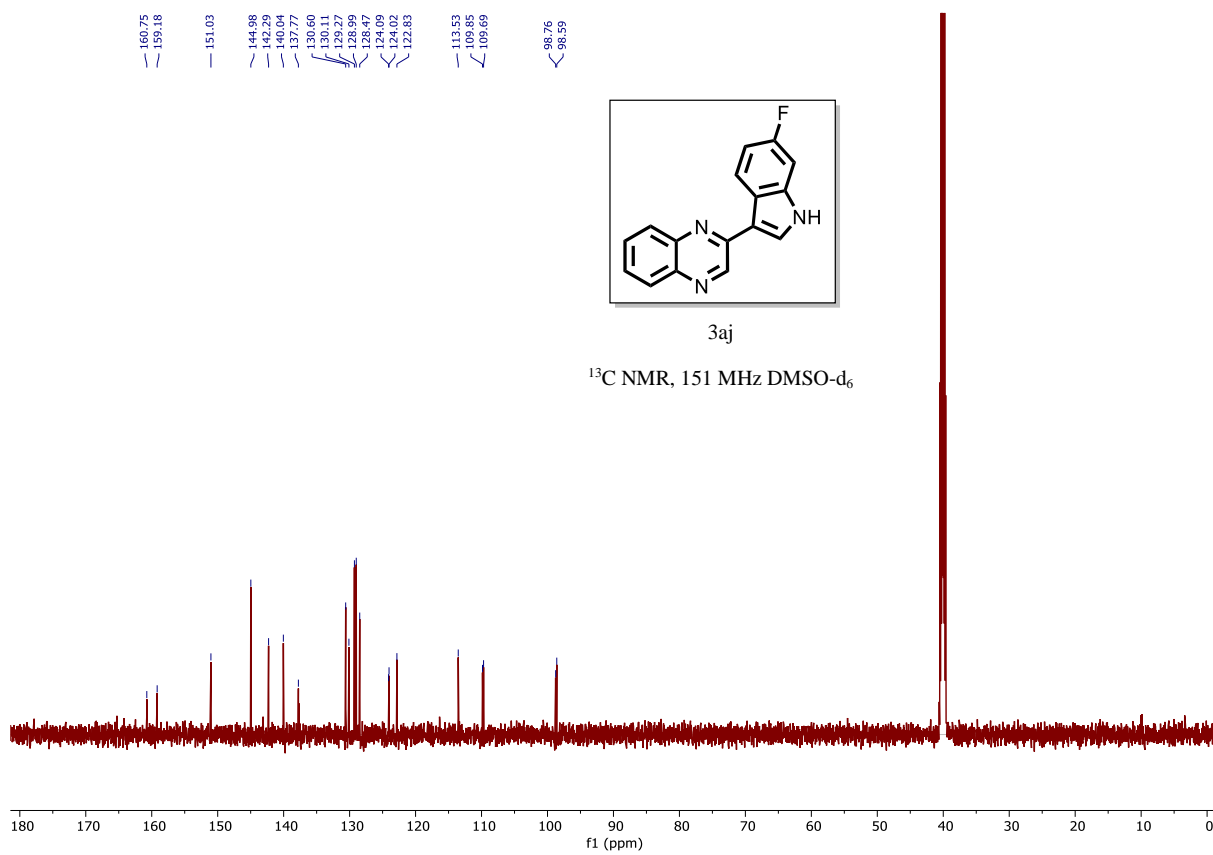

<sup>13</sup>C NMR of 3aj

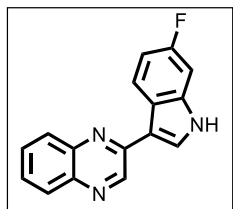

3aj

$^{19}\text{F}$  NMR, 471 MHz DMSO- $d_6$

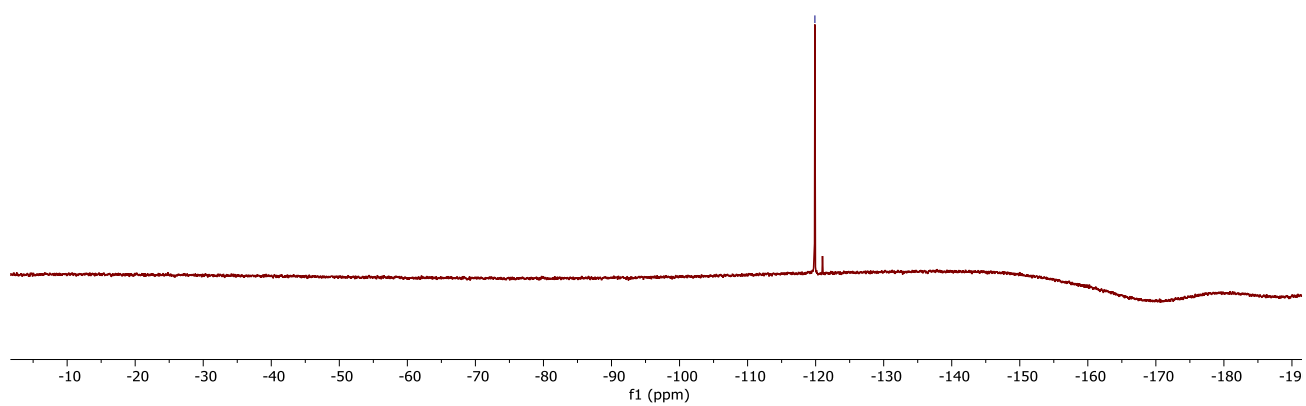

$^{19}\text{F}$  NMR of 3aj



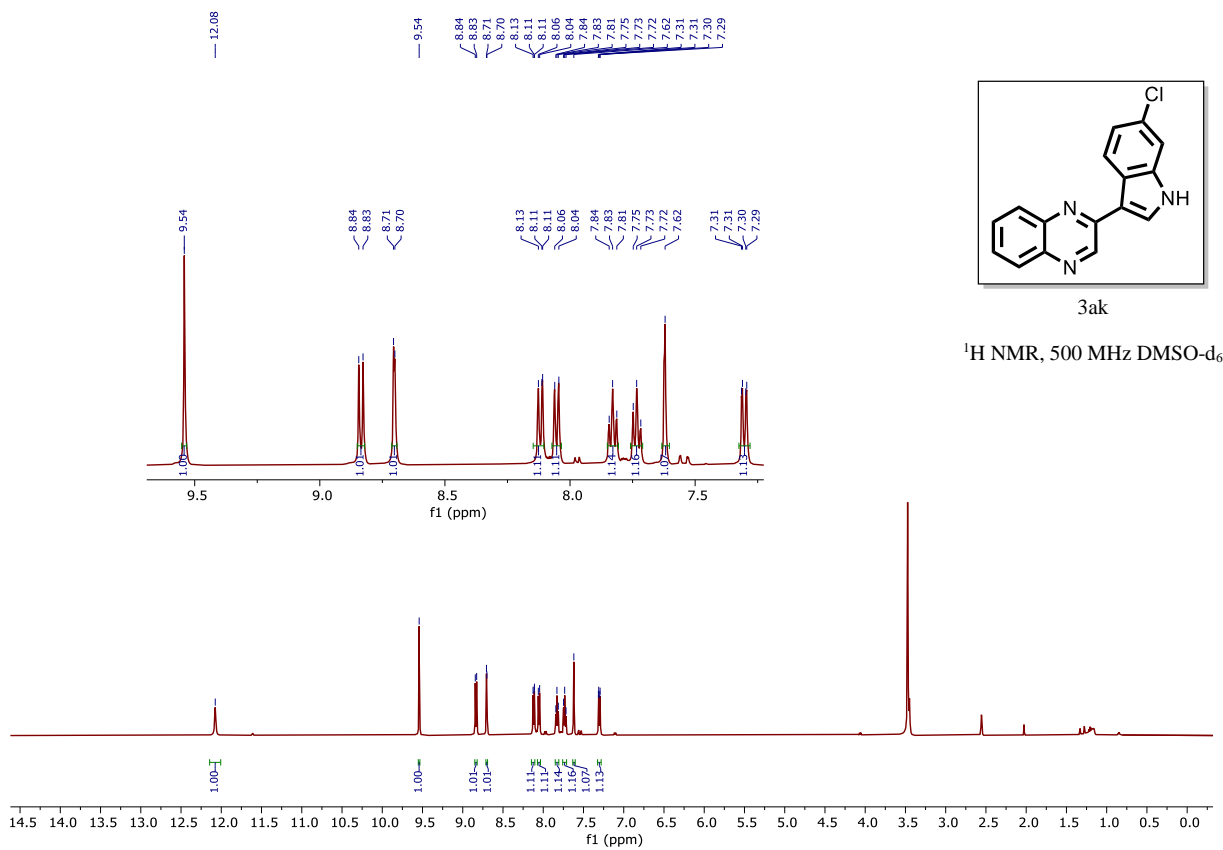

<sup>1</sup>H NMR of 3ak

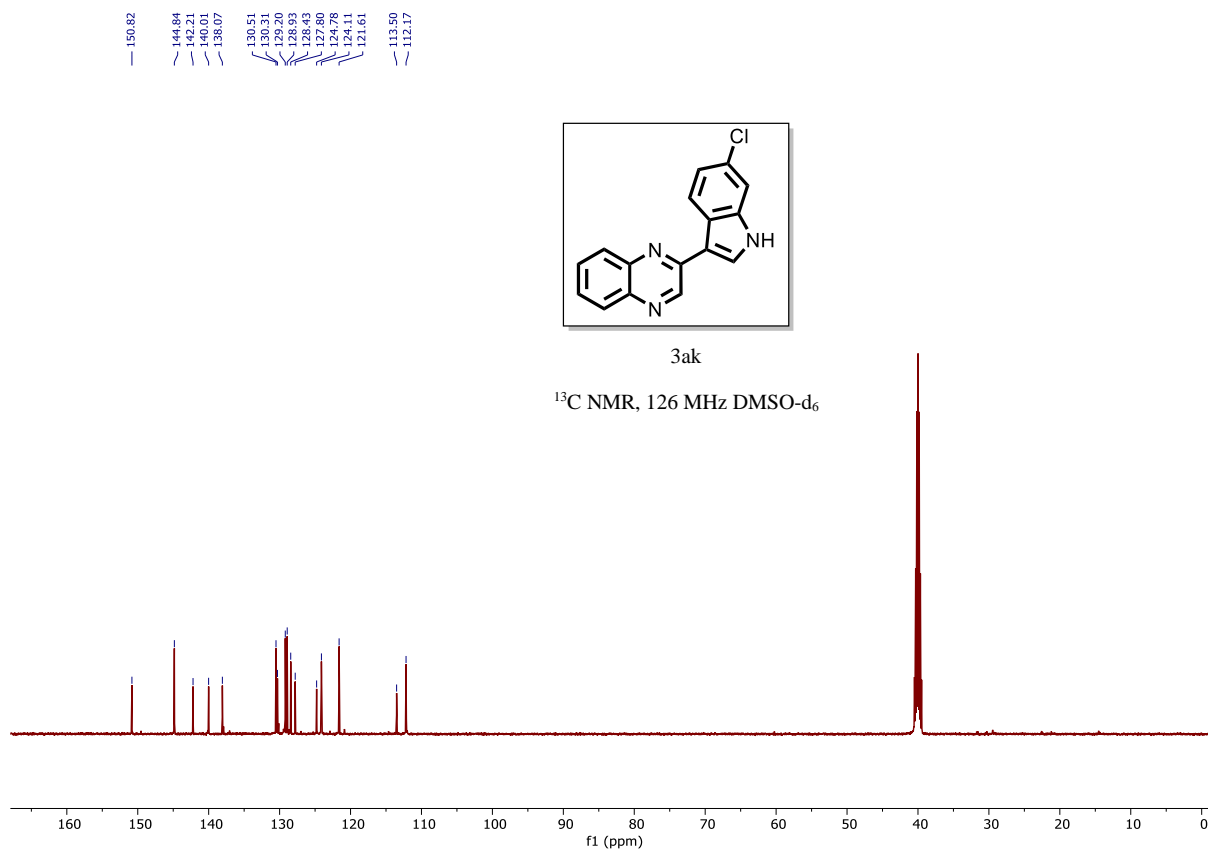

<sup>13</sup>C NMR of 3ak

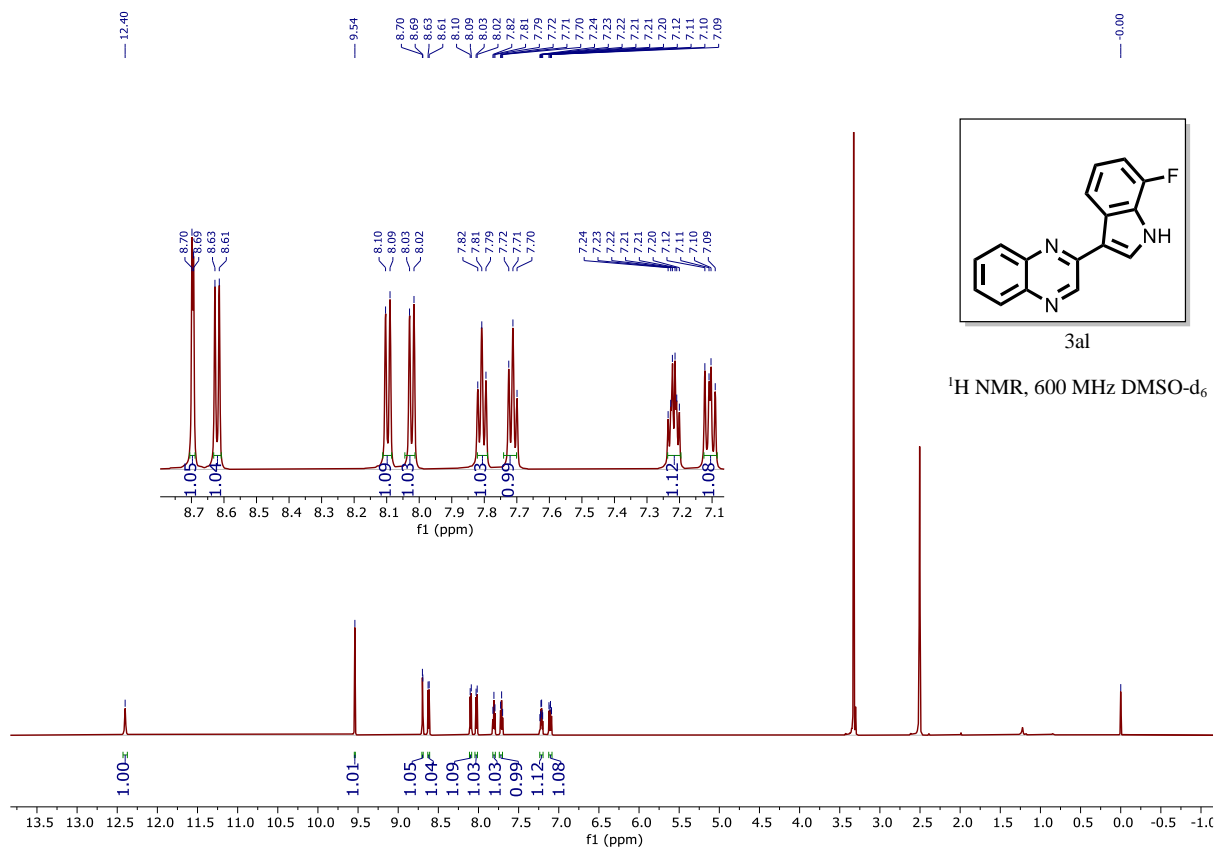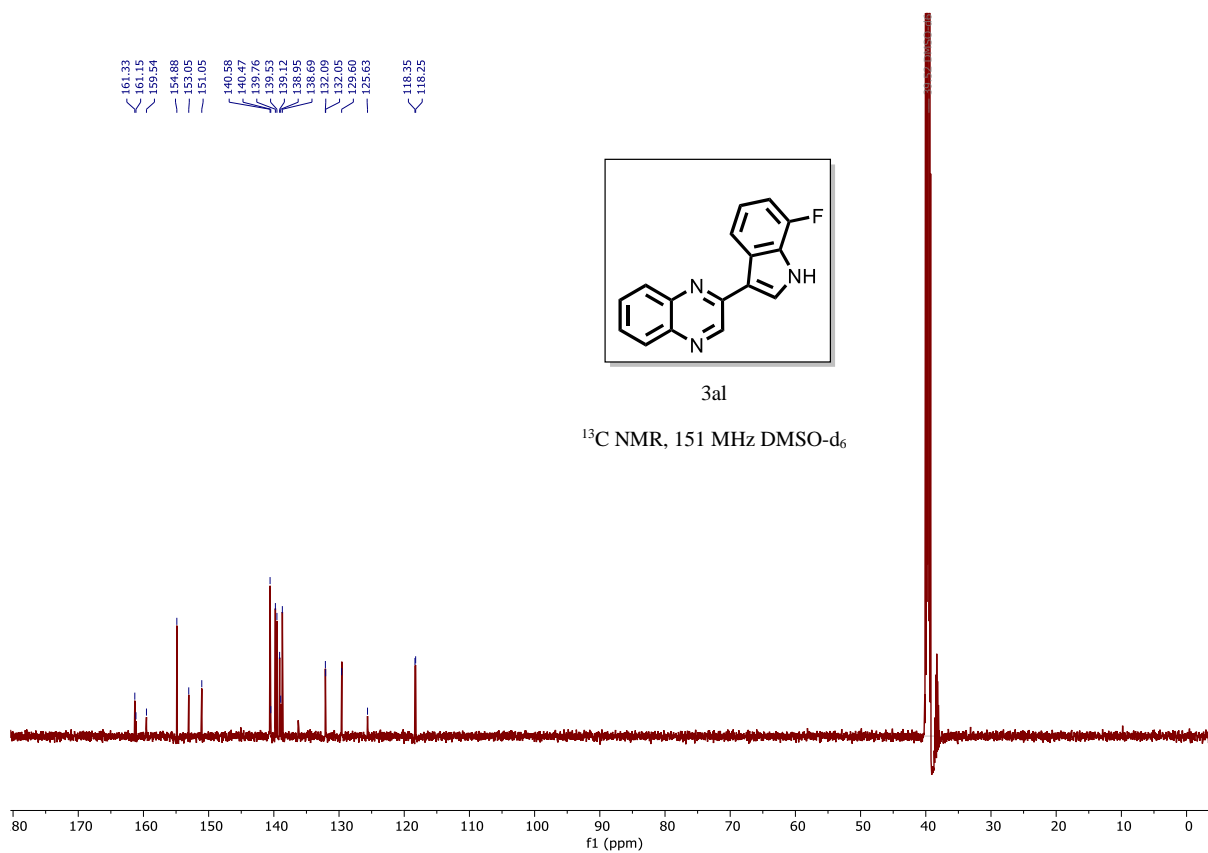

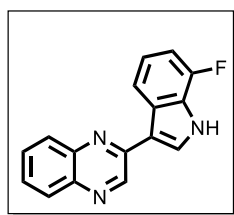

3al

$^{19}\text{F}$  NMR, 471MHz,  $\text{DMSO-d}_6$

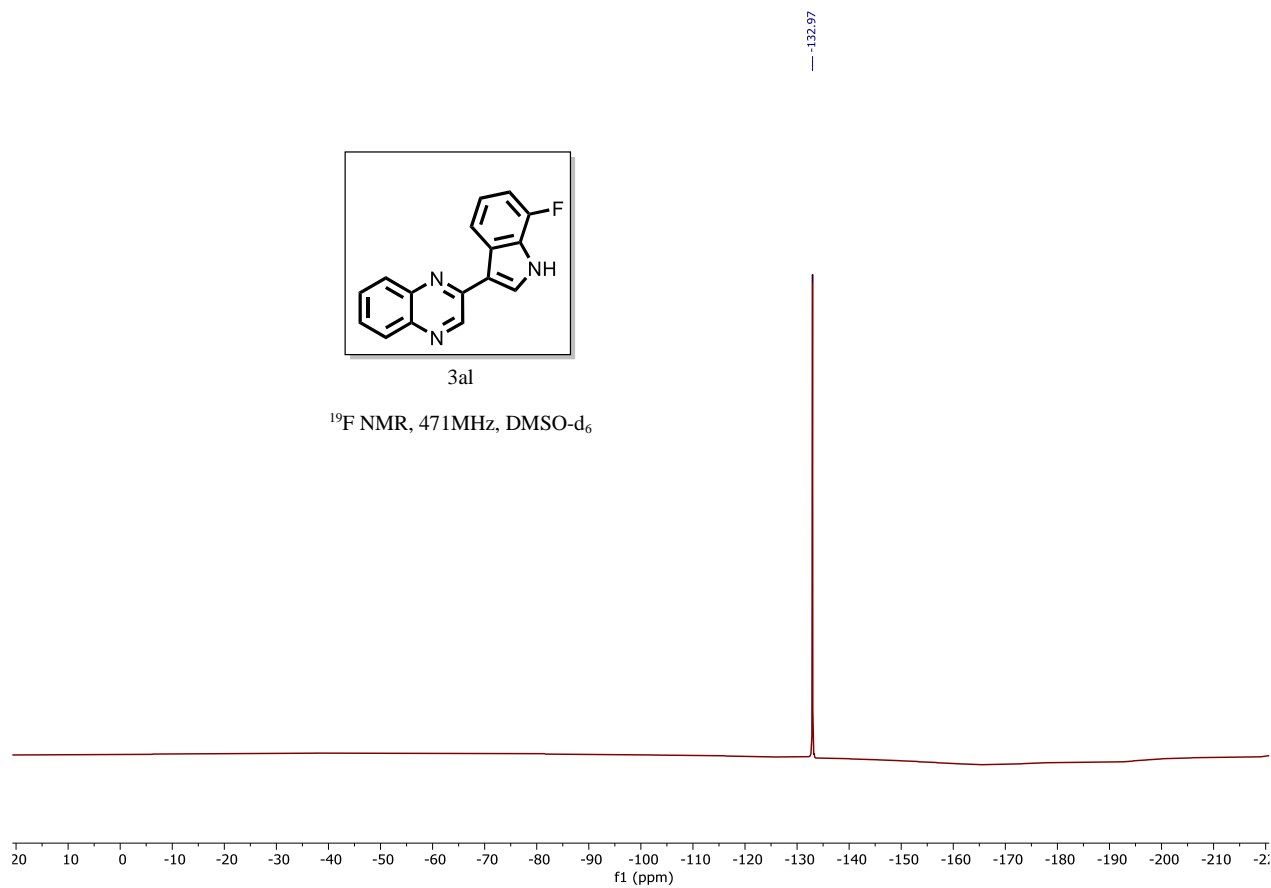

$^{19}\text{F}$  NMR of 3al

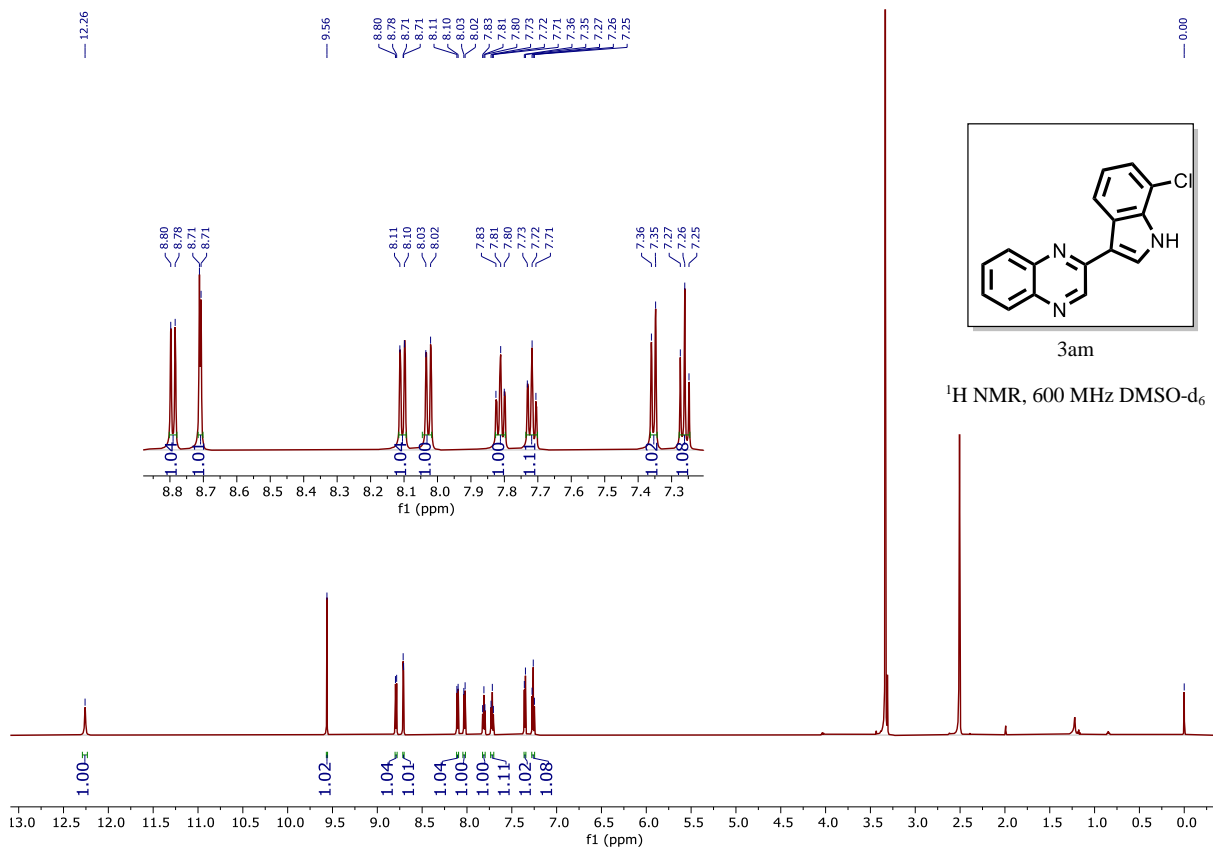

<sup>1</sup>H NMR of 3am

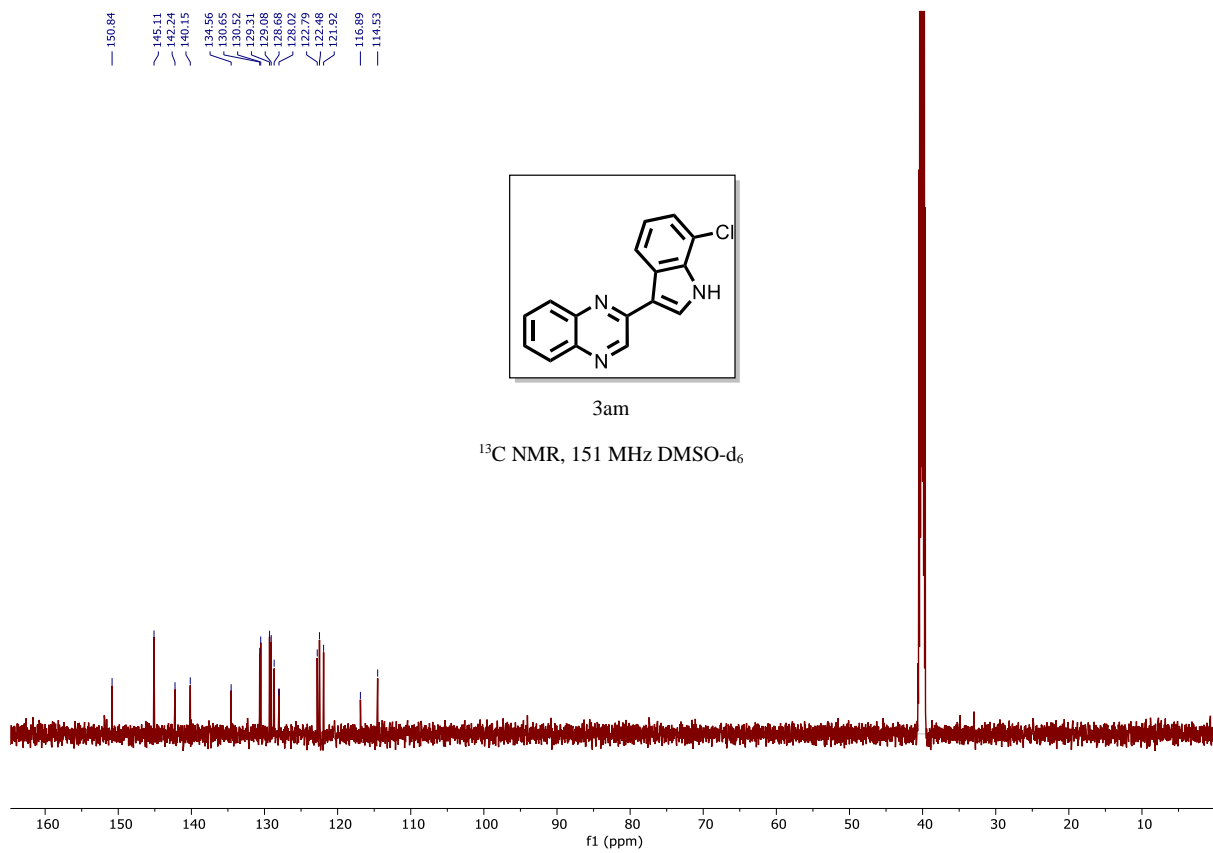

<sup>13</sup>C NMR of 3am

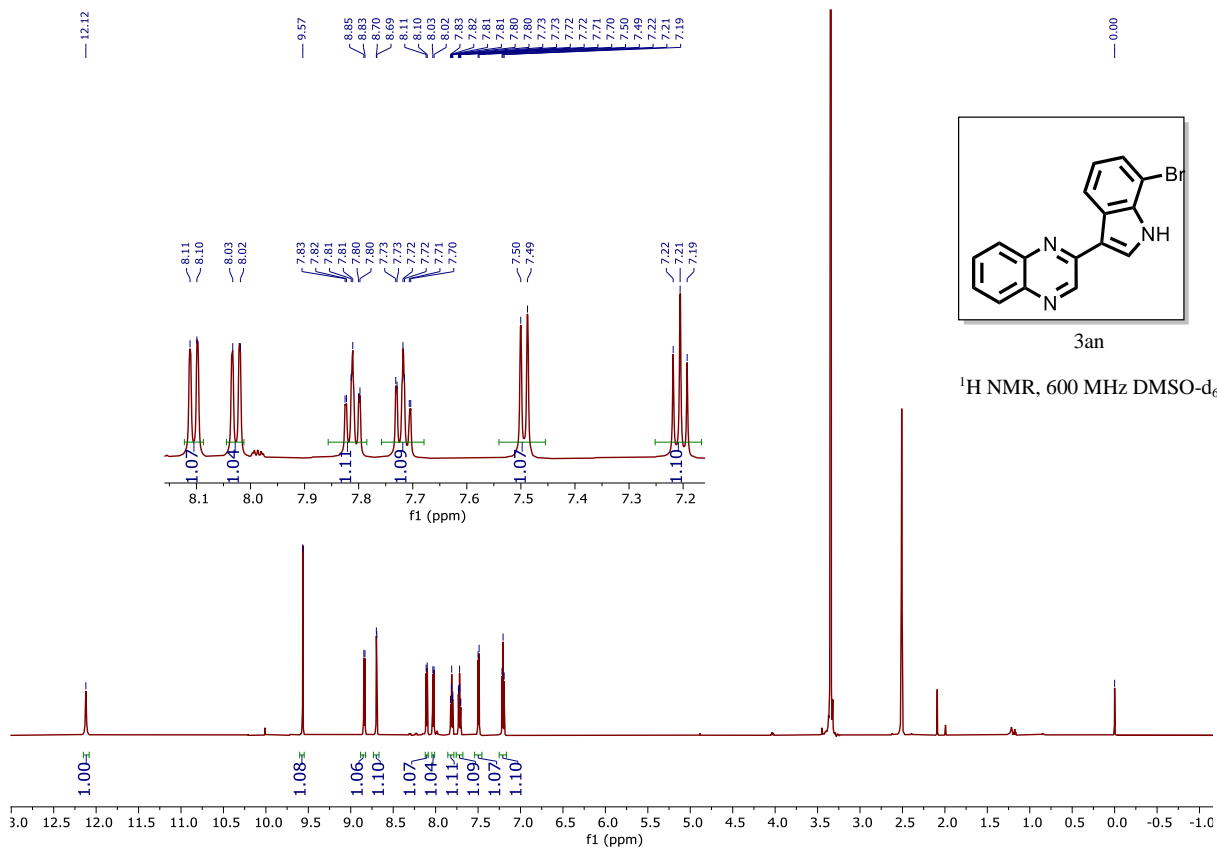

**<sup>1</sup>H NMR of 3an**

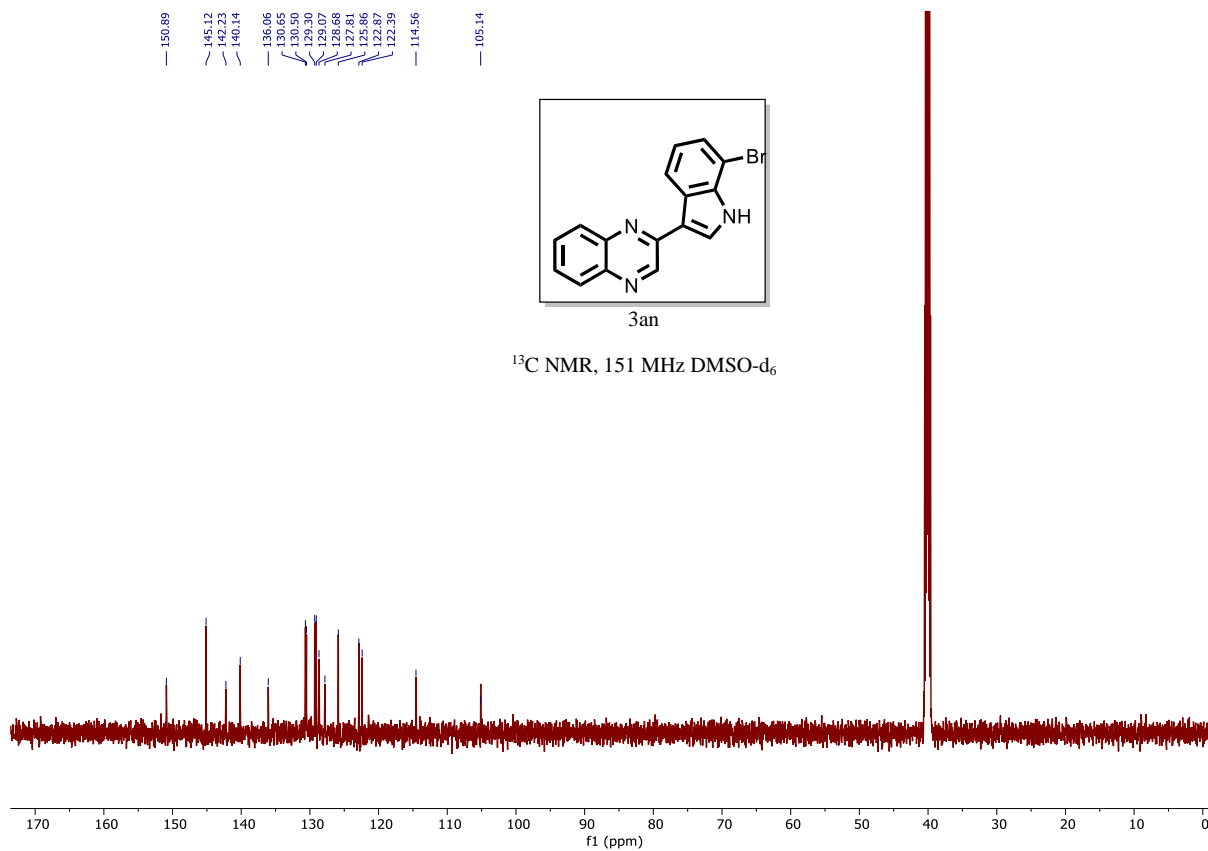

**<sup>13</sup>C NMR of 3an**

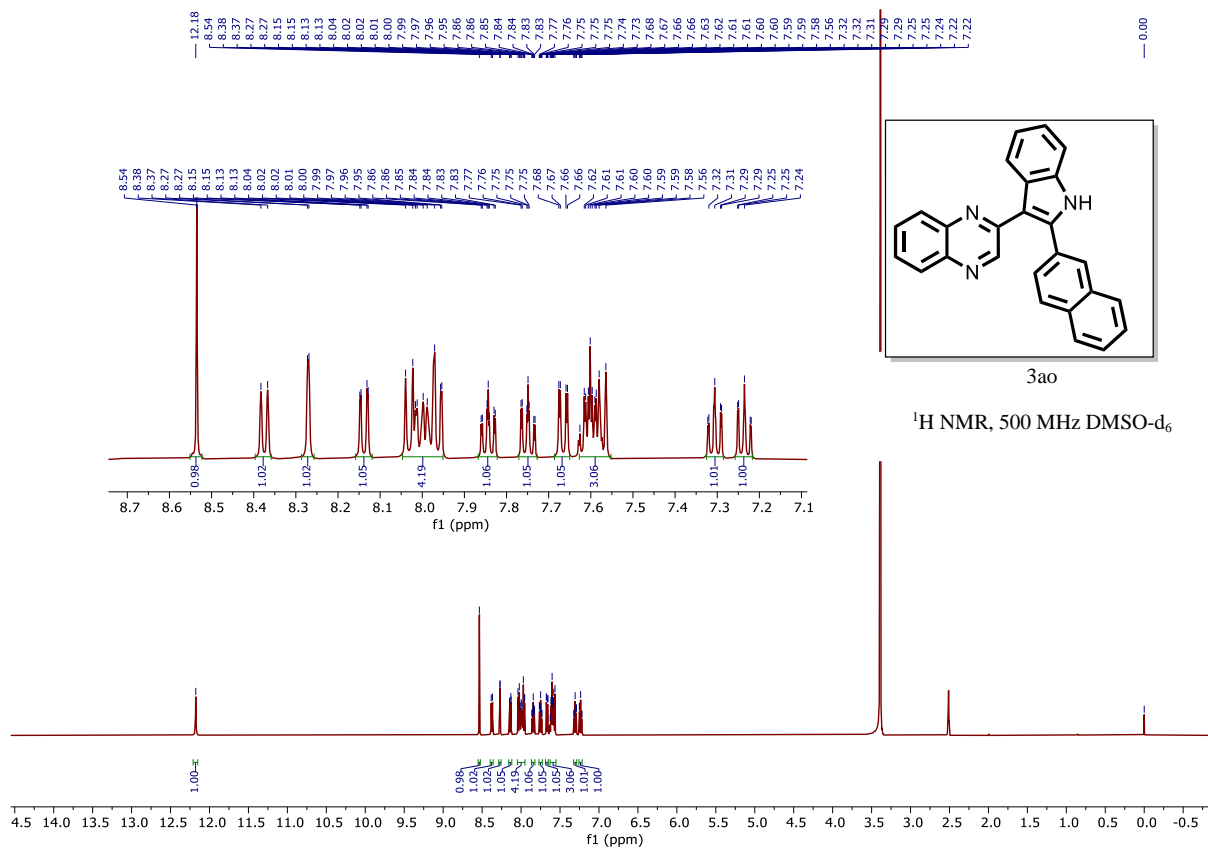

<sup>1</sup>H NMR of 3ao

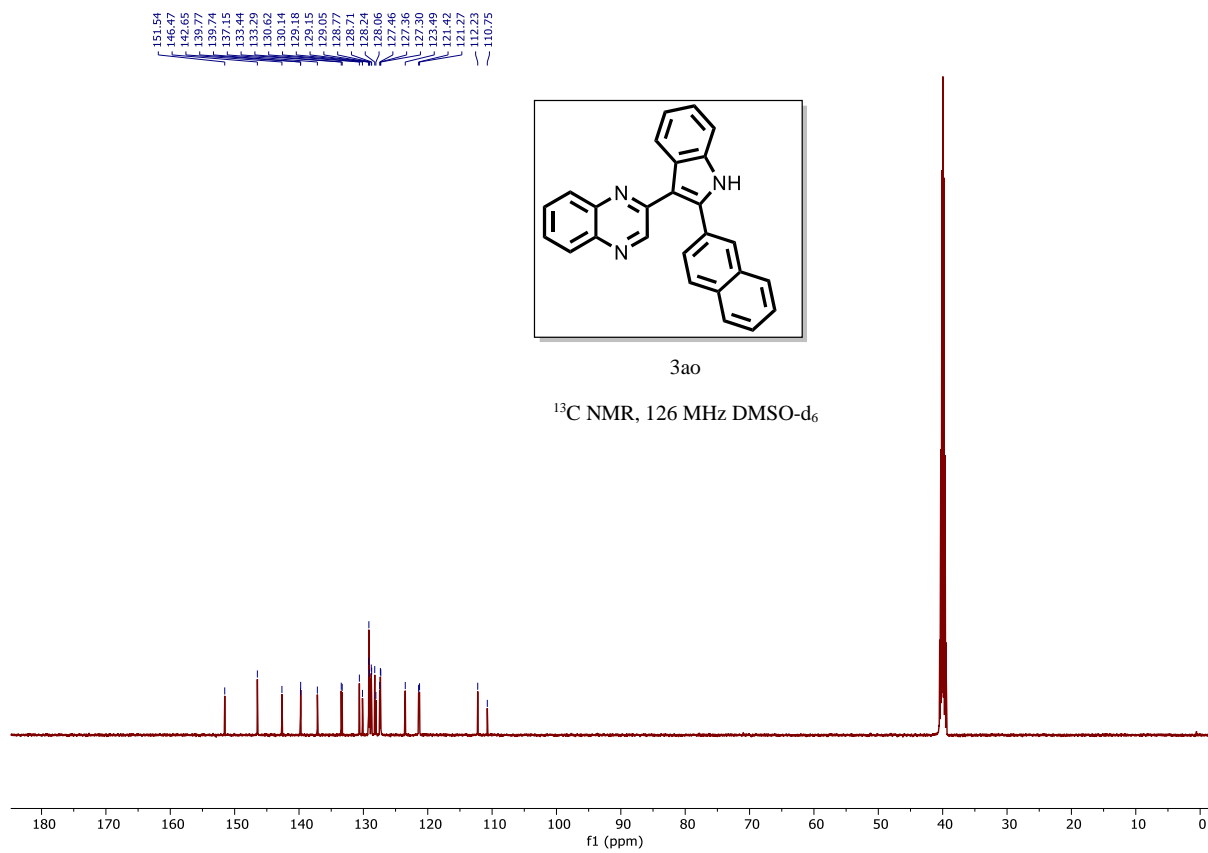

<sup>13</sup>C NMR of 3ao

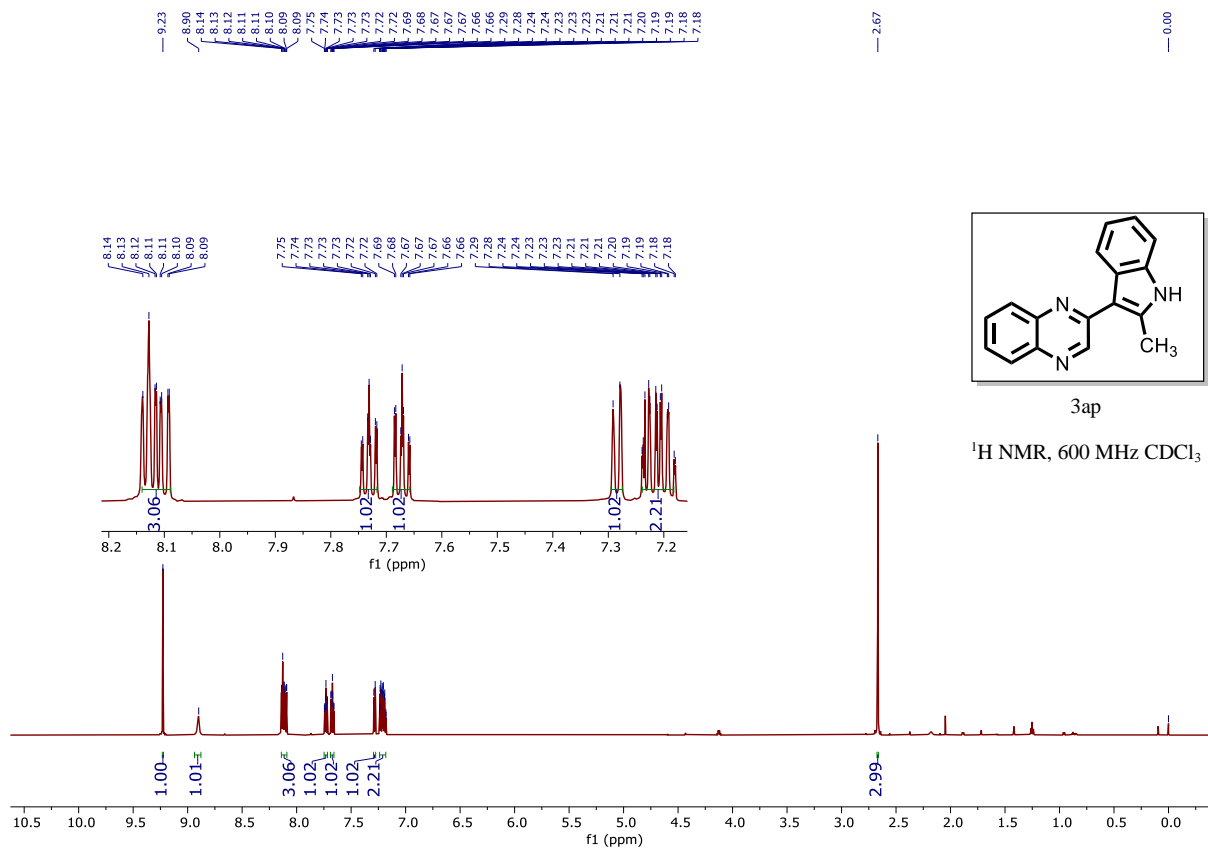

<sup>1</sup>H NMR of 3ap

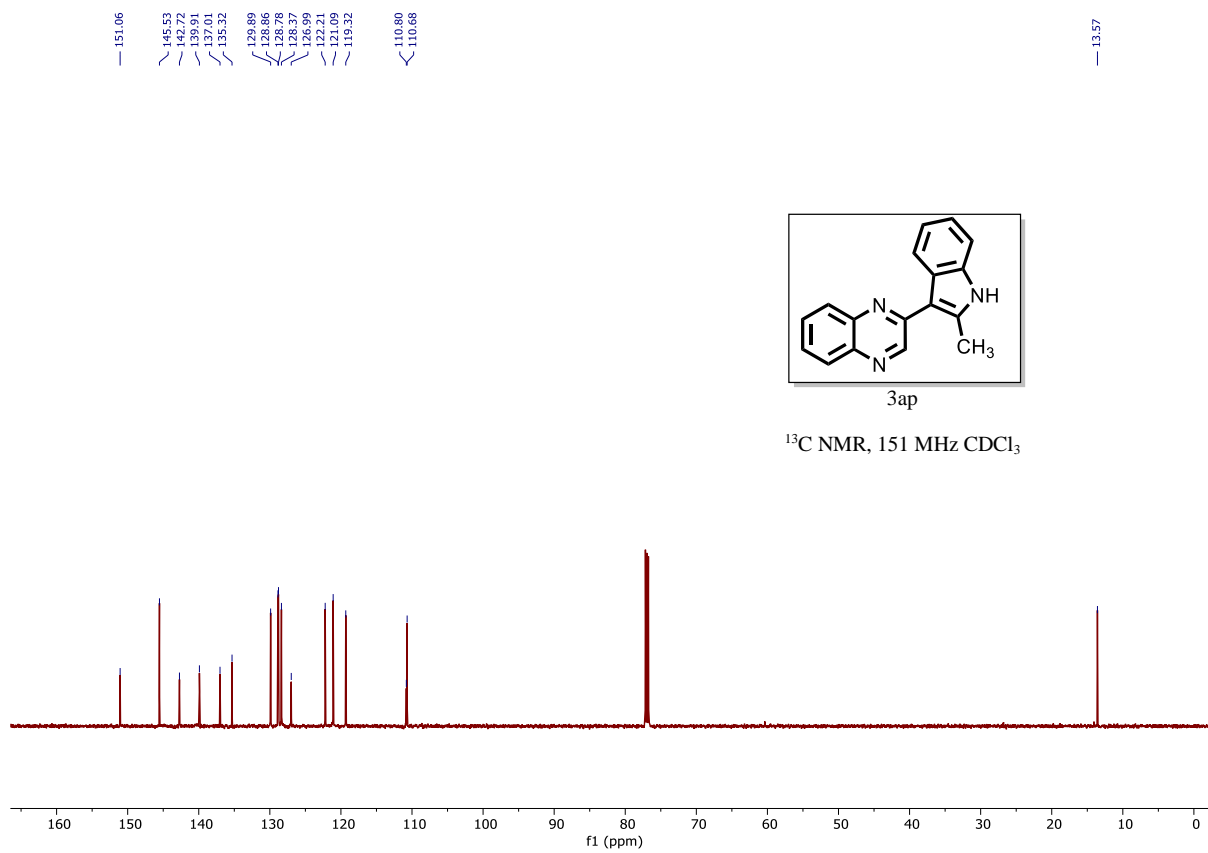

<sup>13</sup>C NMR of 3ap

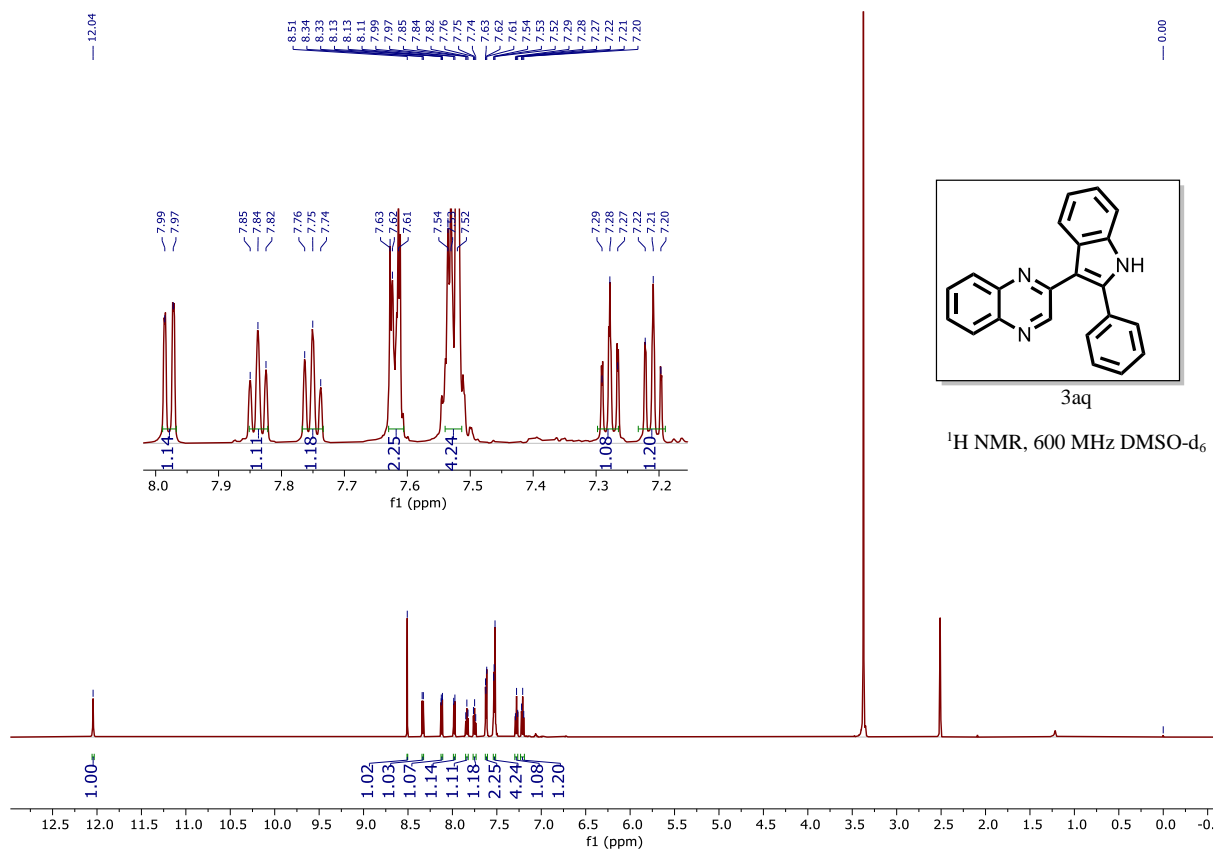

<sup>1</sup>H NMR of 3aq

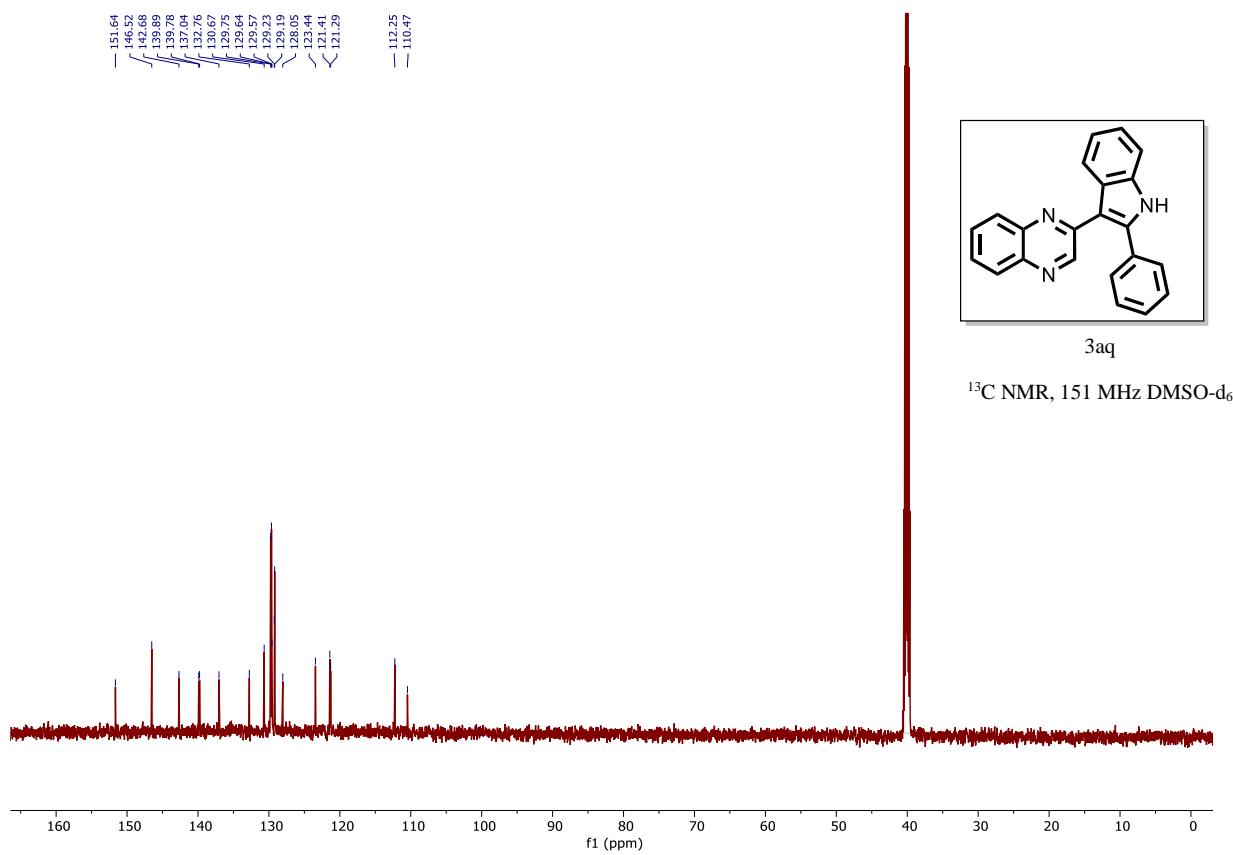

<sup>13</sup>C NMR of 3aq



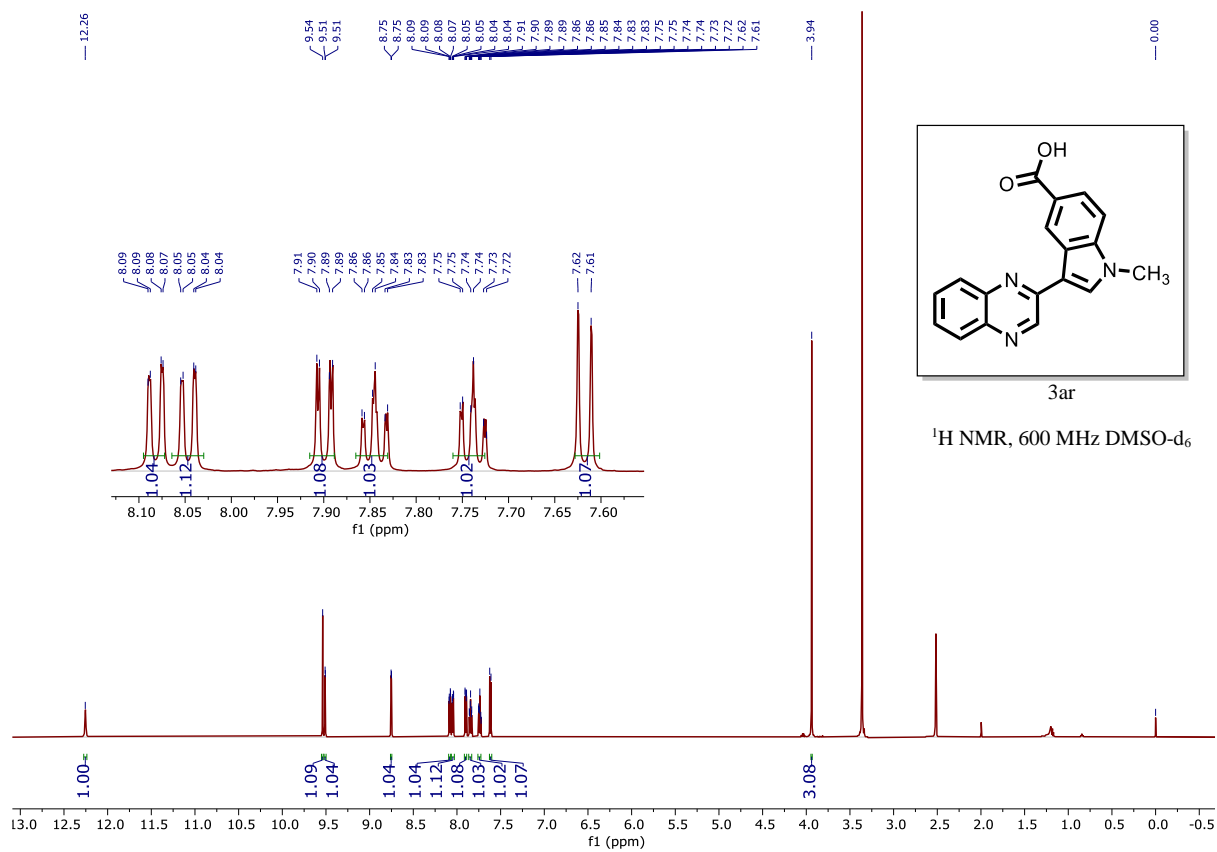

<sup>1</sup>H NMR of 3ar

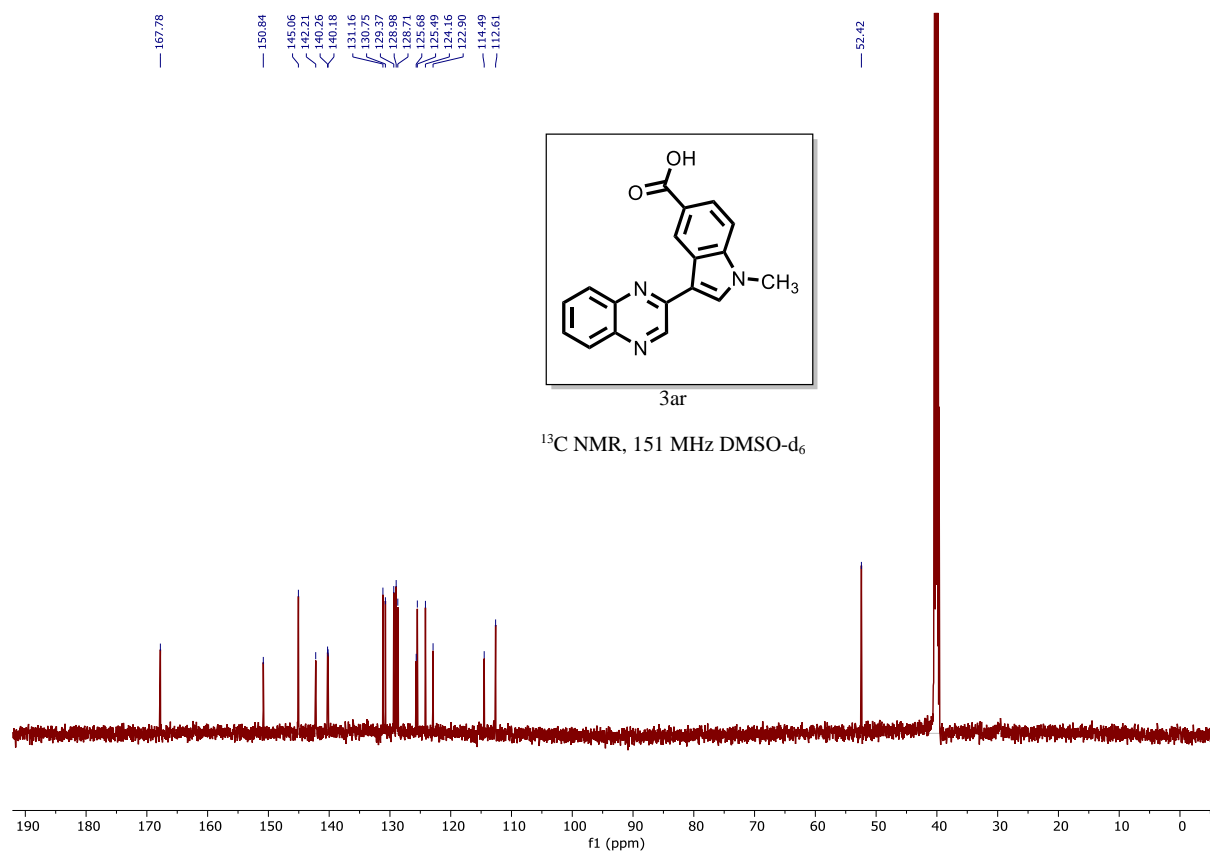

<sup>13</sup>C NMR of 3ar

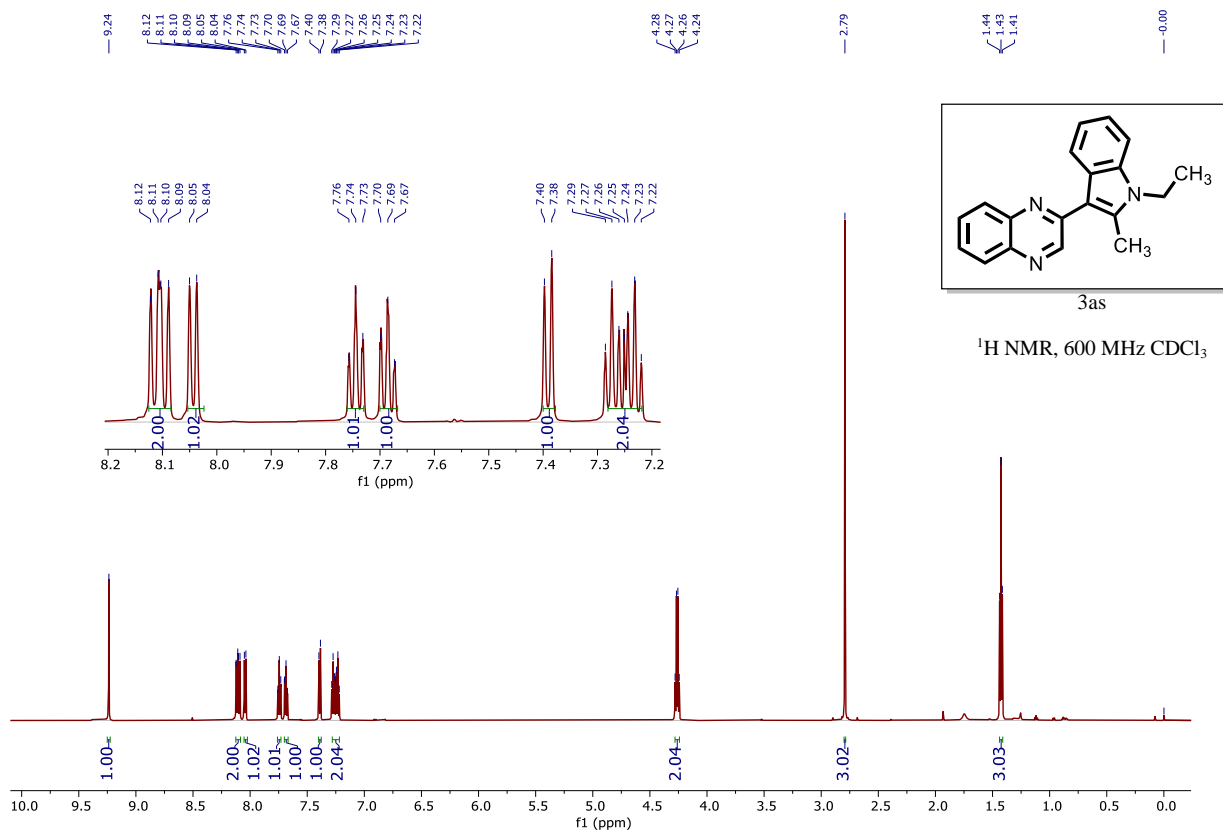

<sup>1</sup>H NMR of 3as

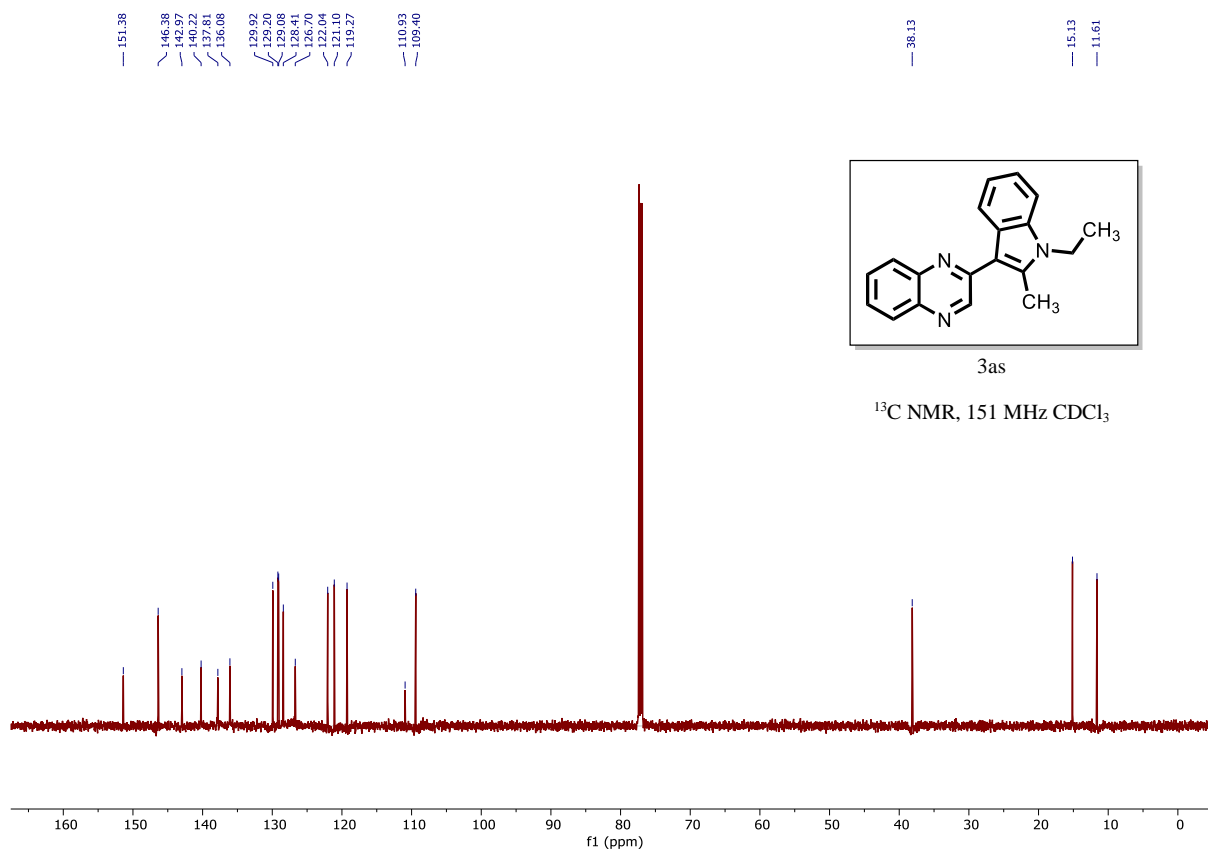

<sup>13</sup>C NMR of 3as

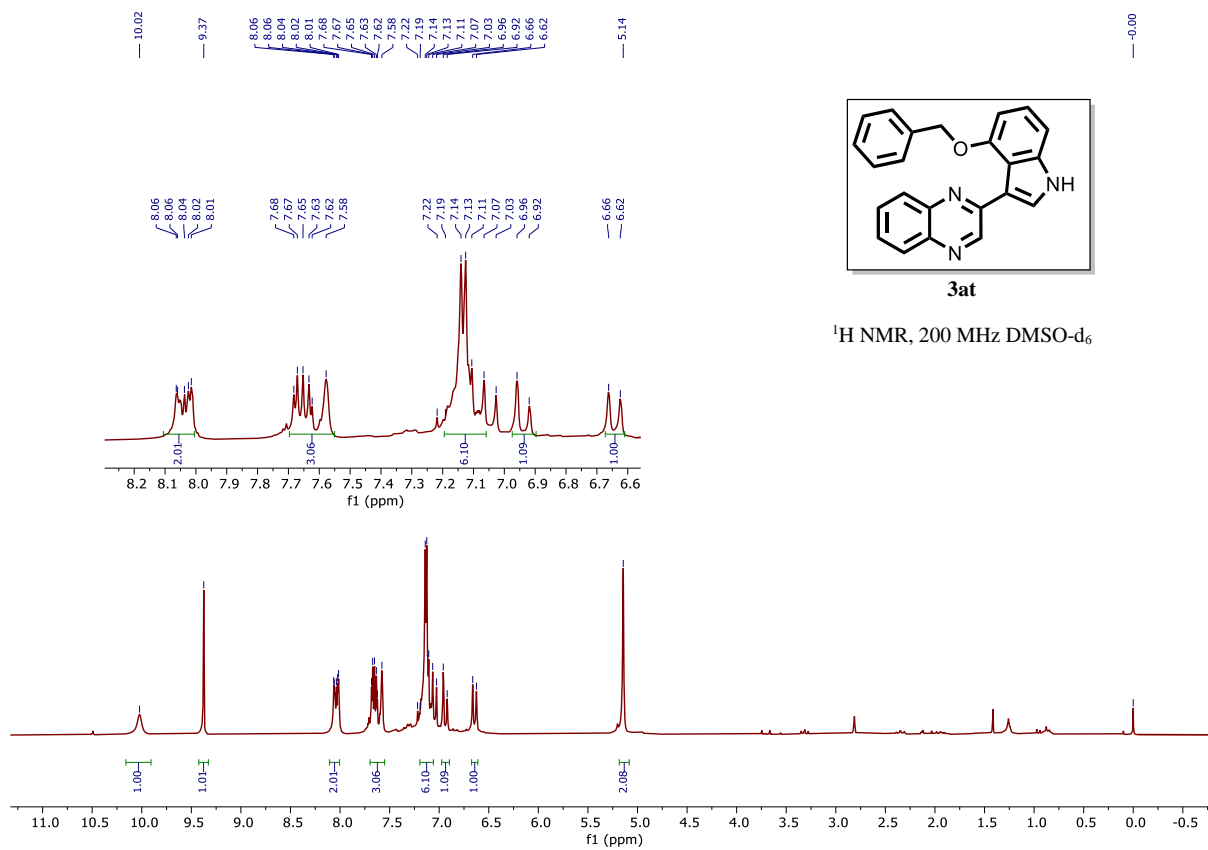

<sup>1</sup>H NMR of 3at

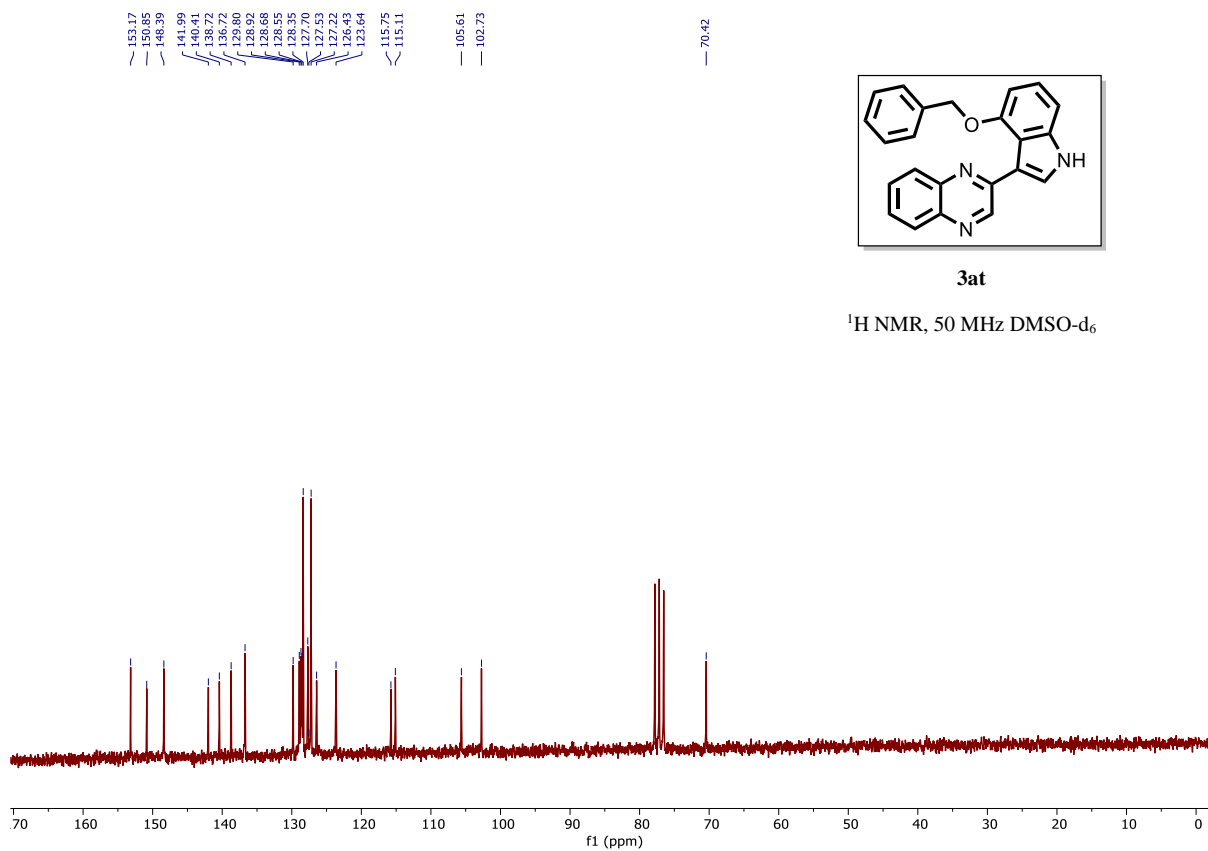

<sup>13</sup>C NMR of 3at

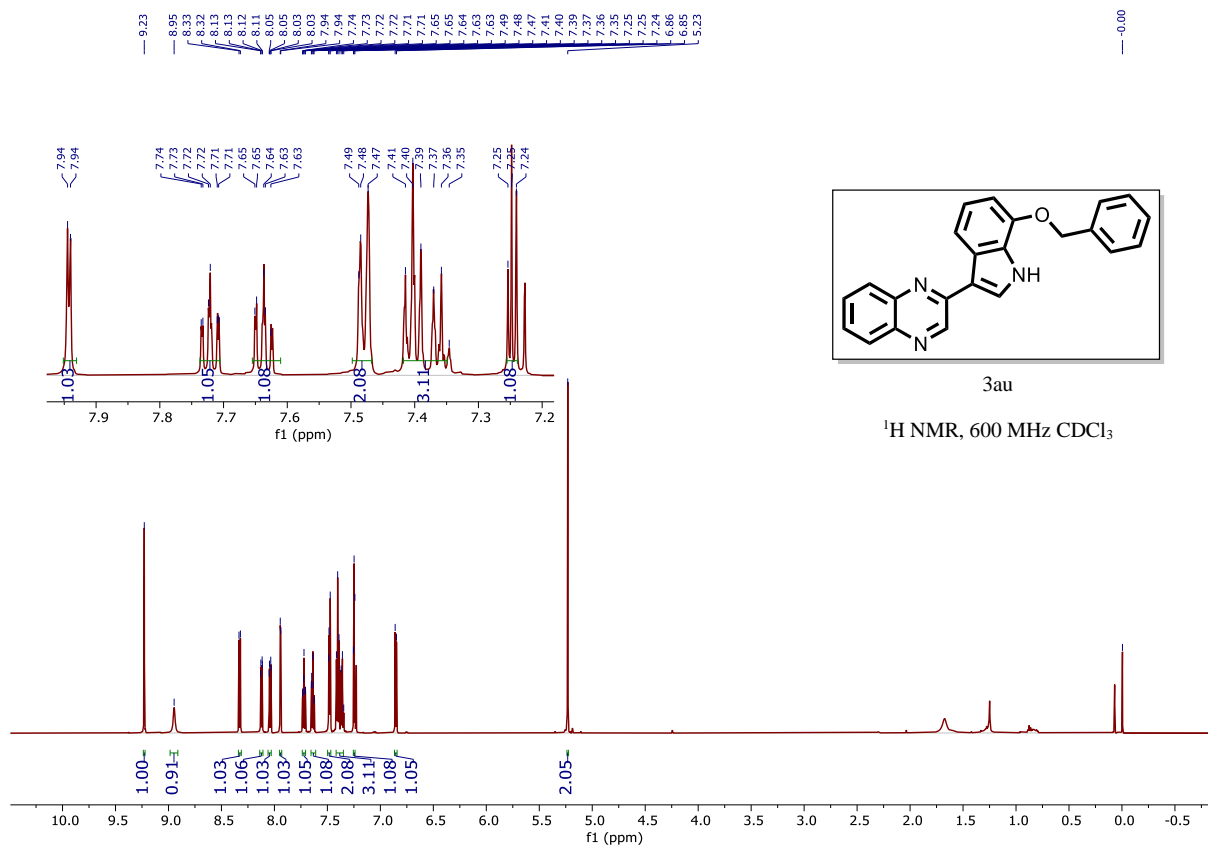

<sup>1</sup>H NMR of 3au

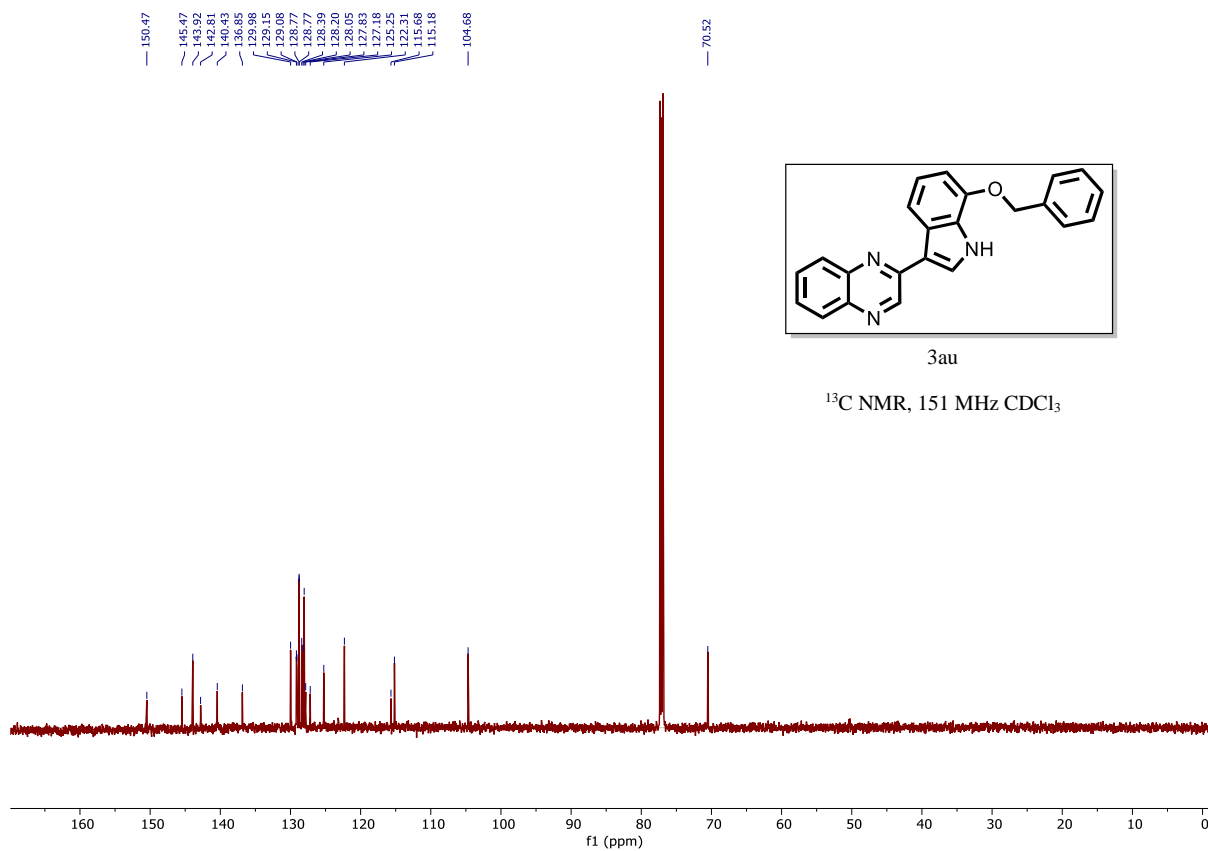

<sup>13</sup>C NMR of 3au

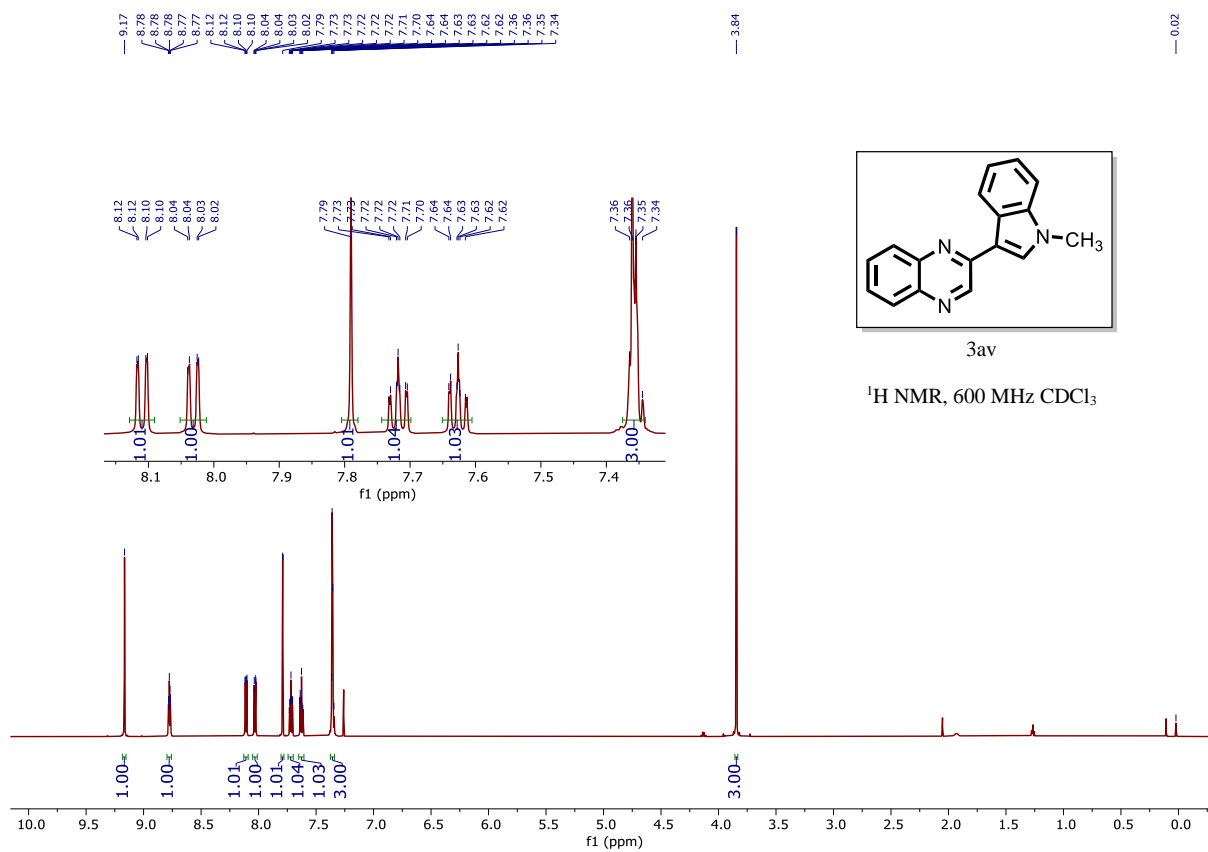

<sup>1</sup>H NMR of 3av

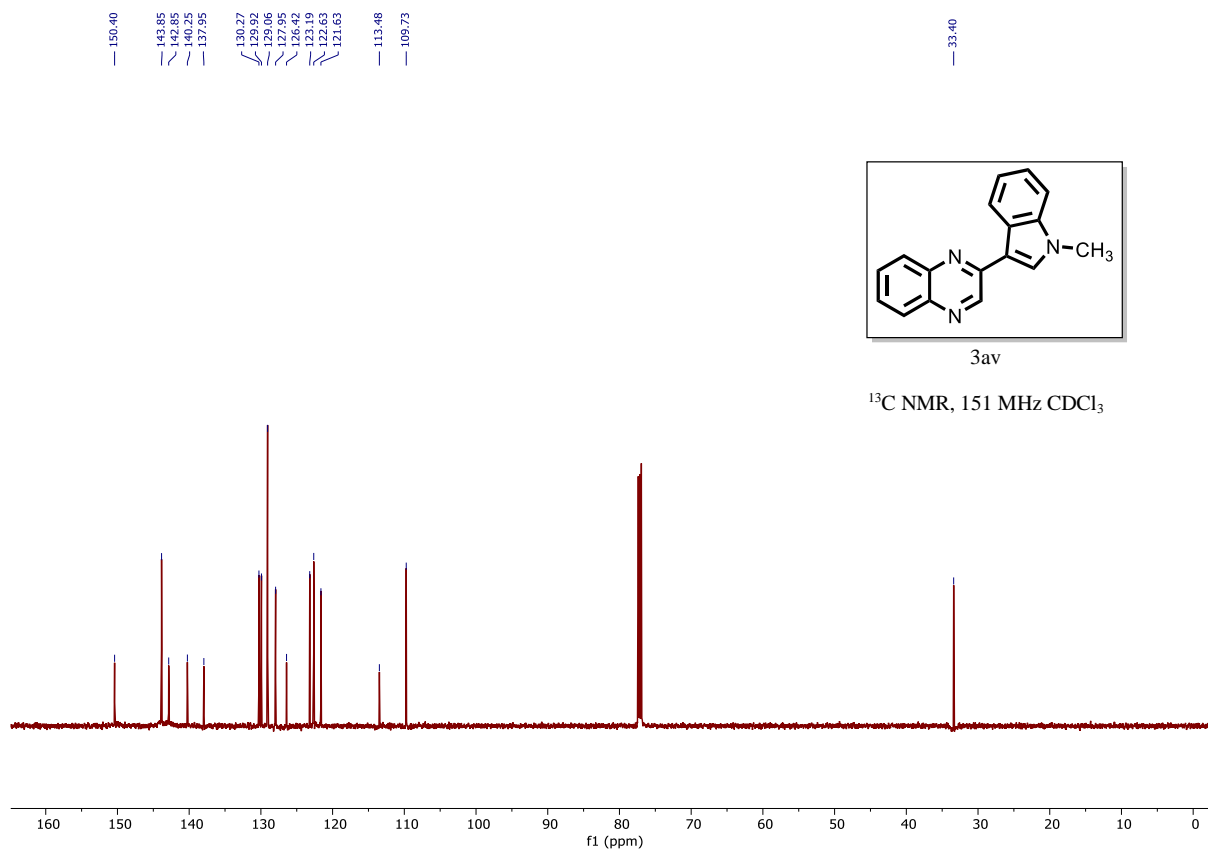

<sup>13</sup>C NMR of 3av

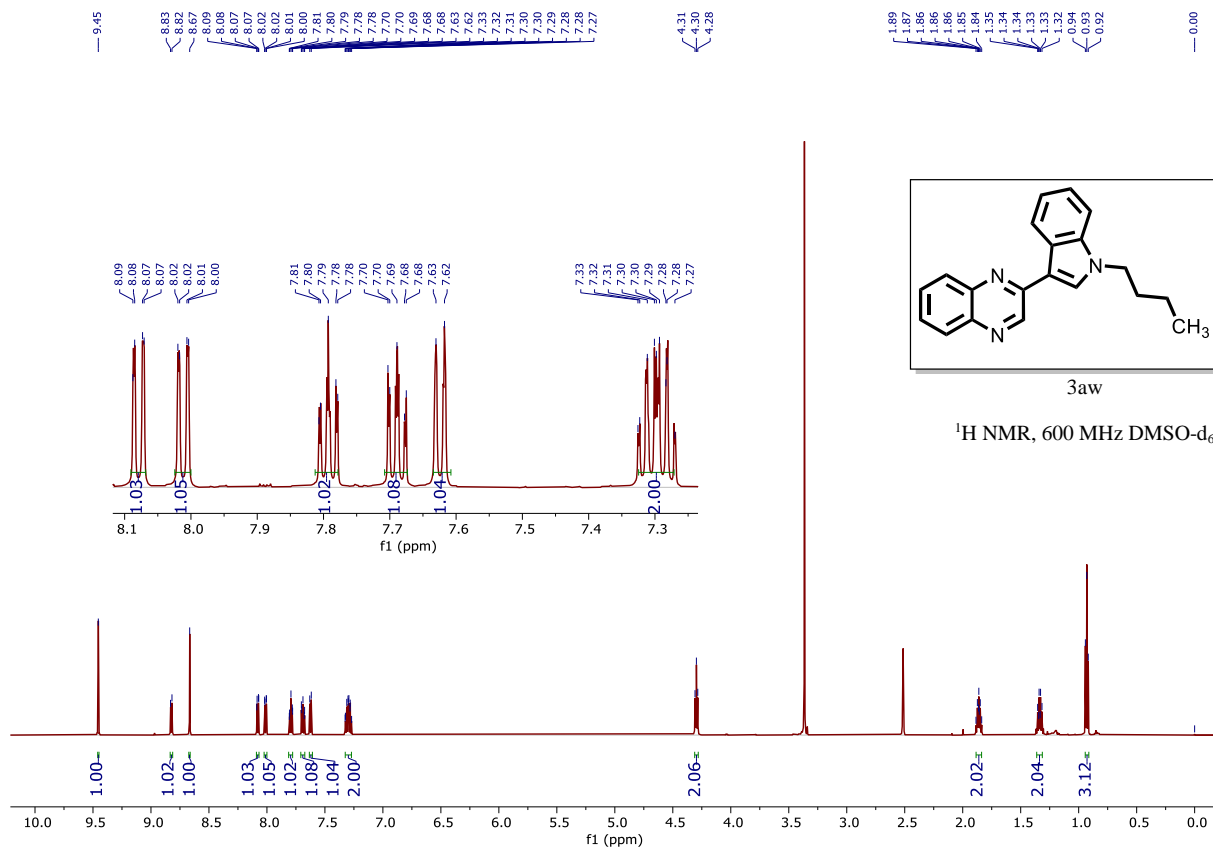

**<sup>1</sup>H NMR of 3aw**

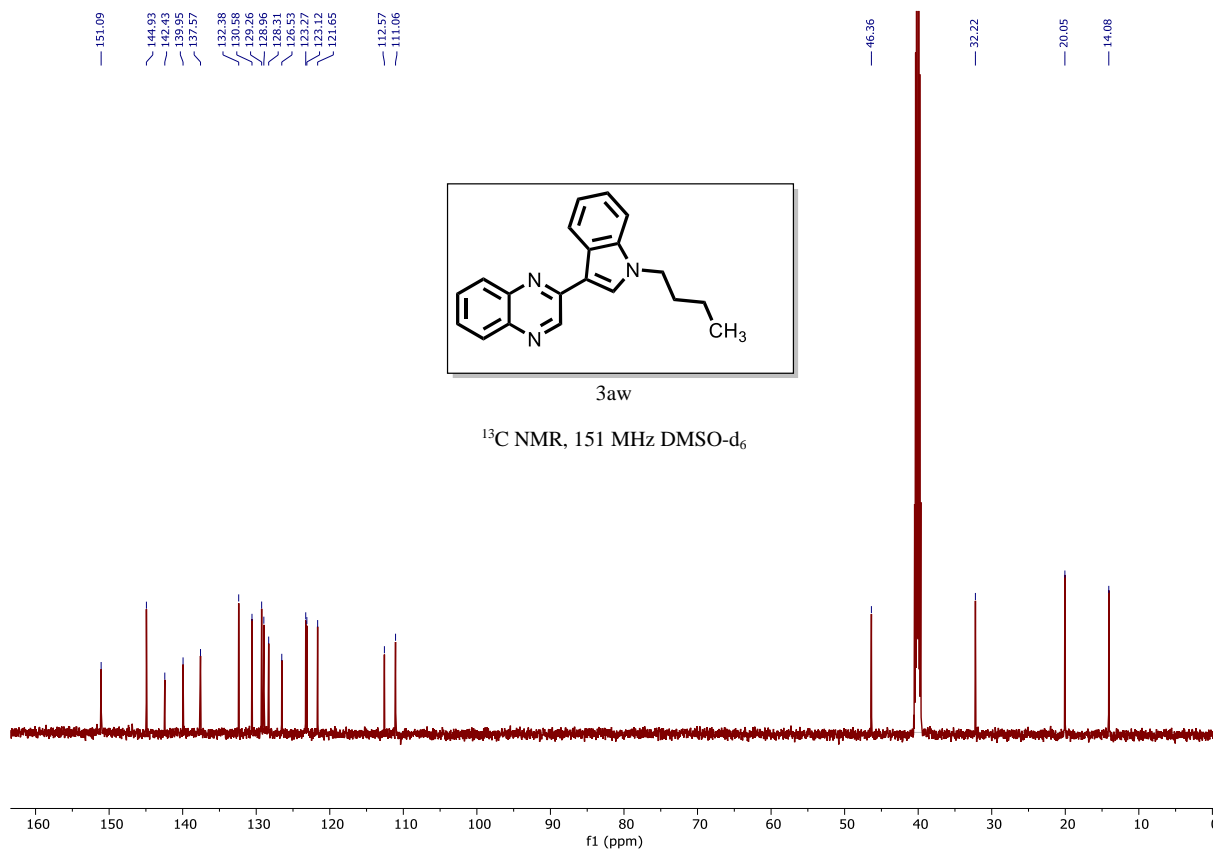

**<sup>13</sup>C NMR of 3aw**

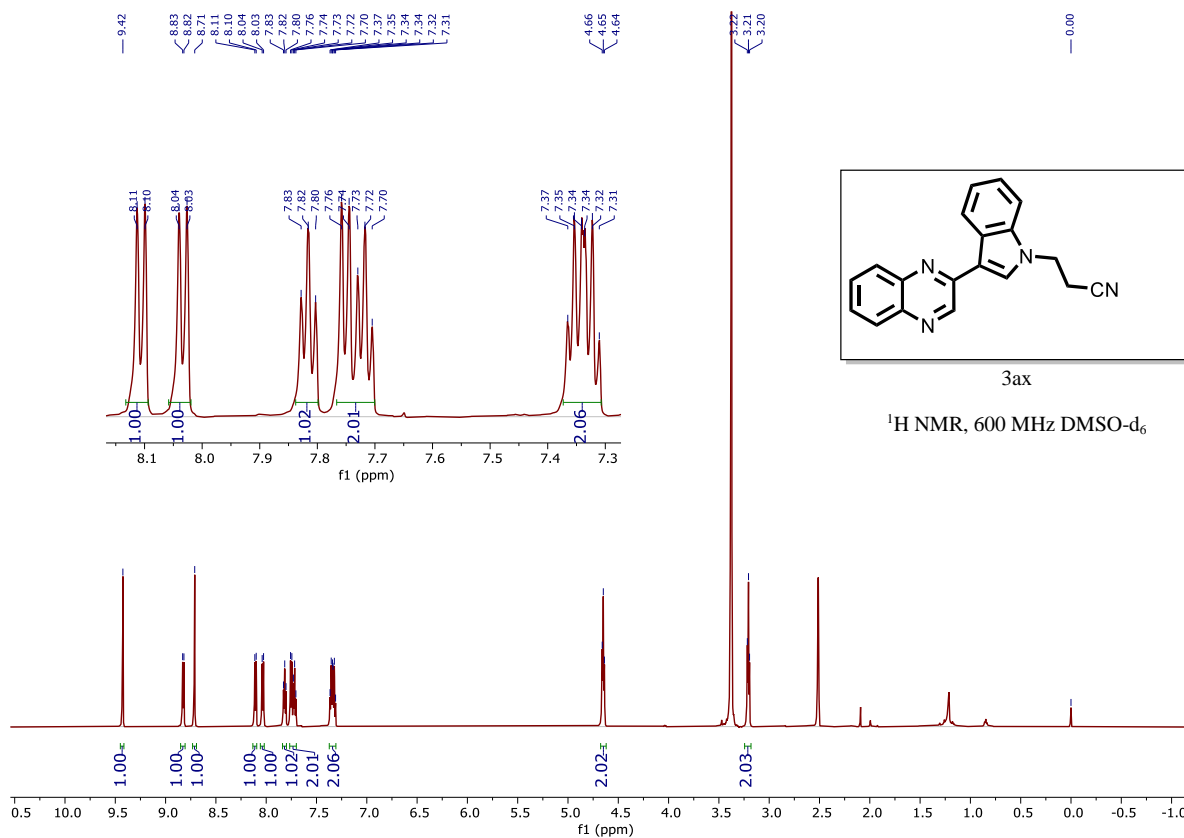

<sup>1</sup>H NMR of 3ax

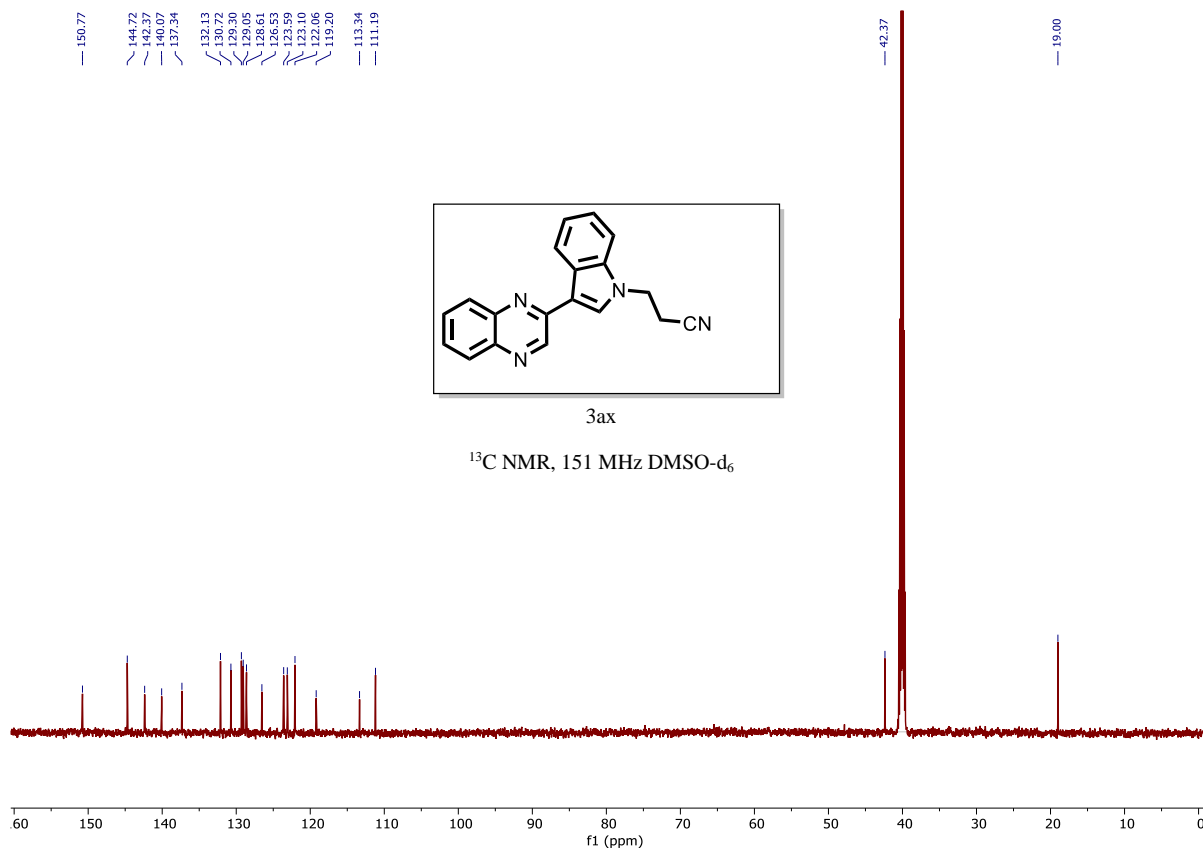

<sup>13</sup>C NMR of 3ax

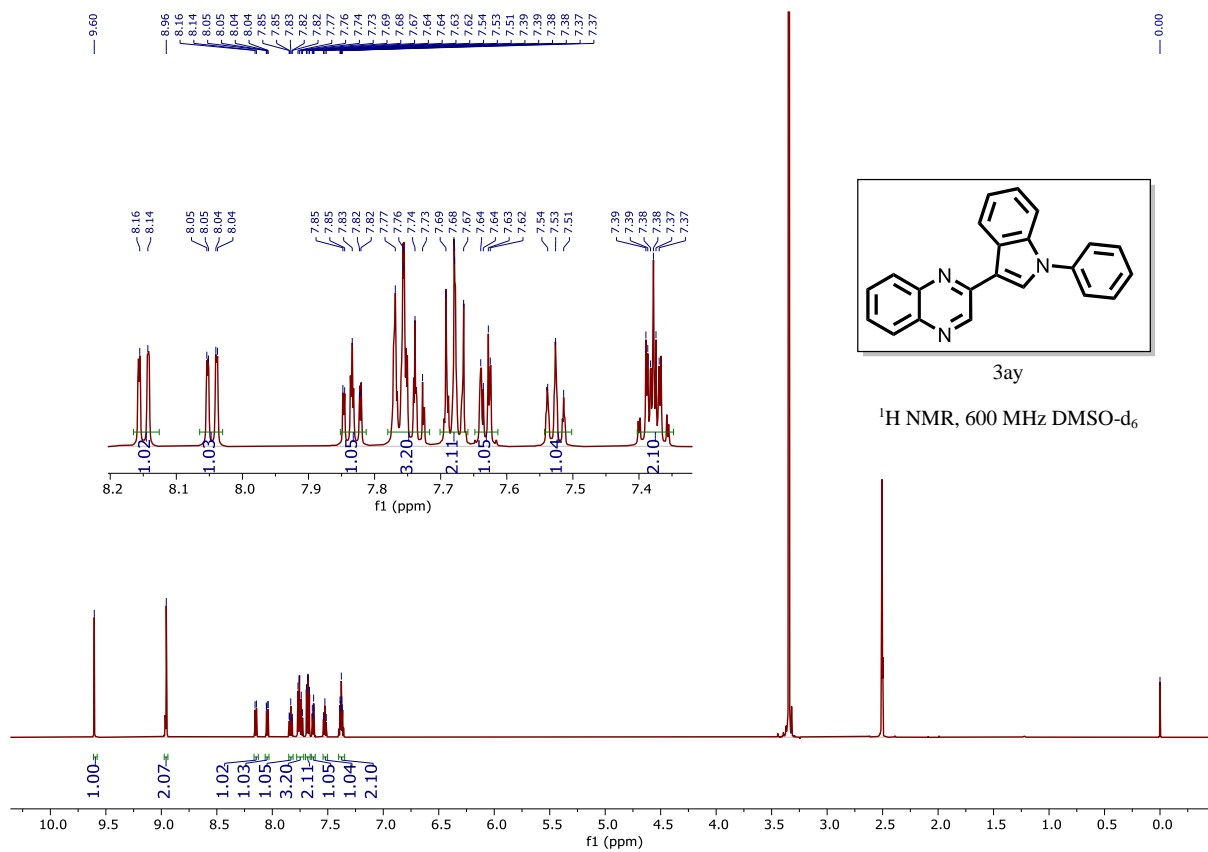

<sup>1</sup>H NMR of 3ay

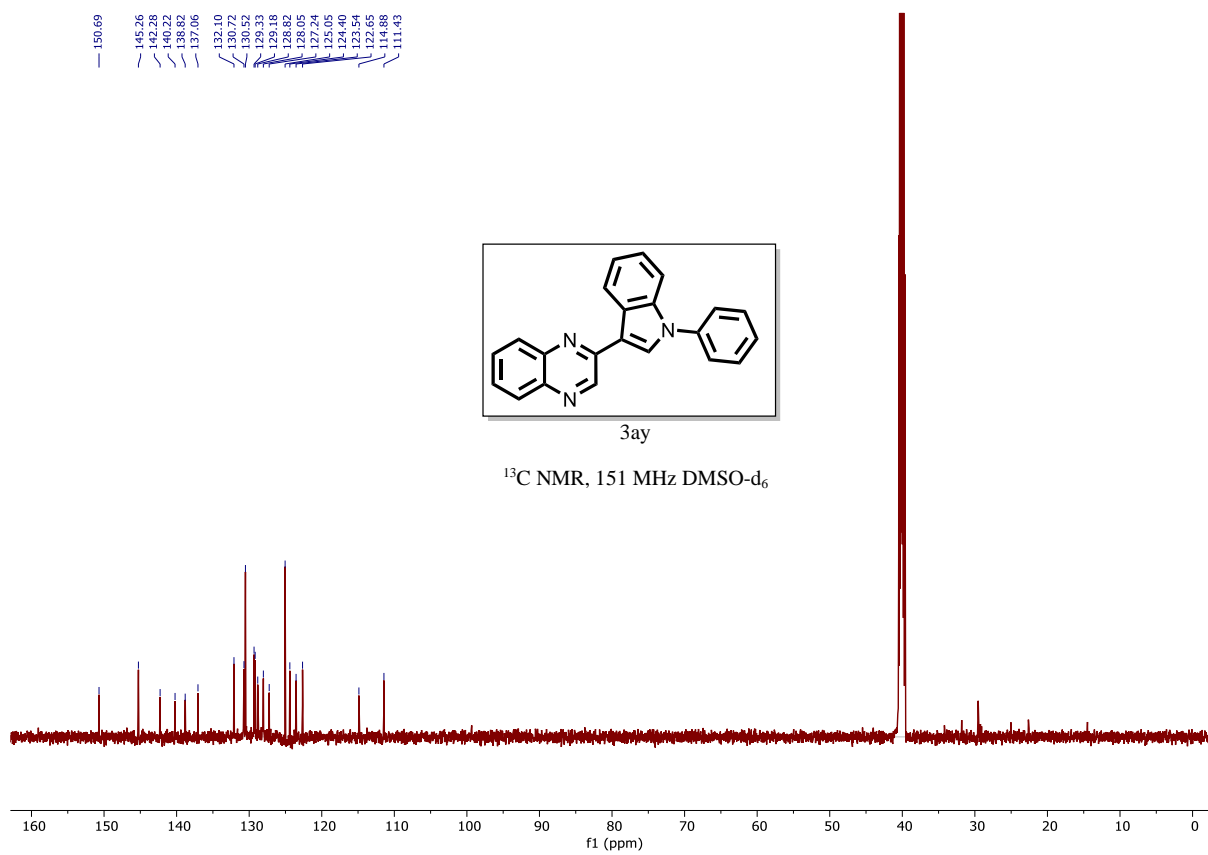

<sup>13</sup>C NMR of 3ay



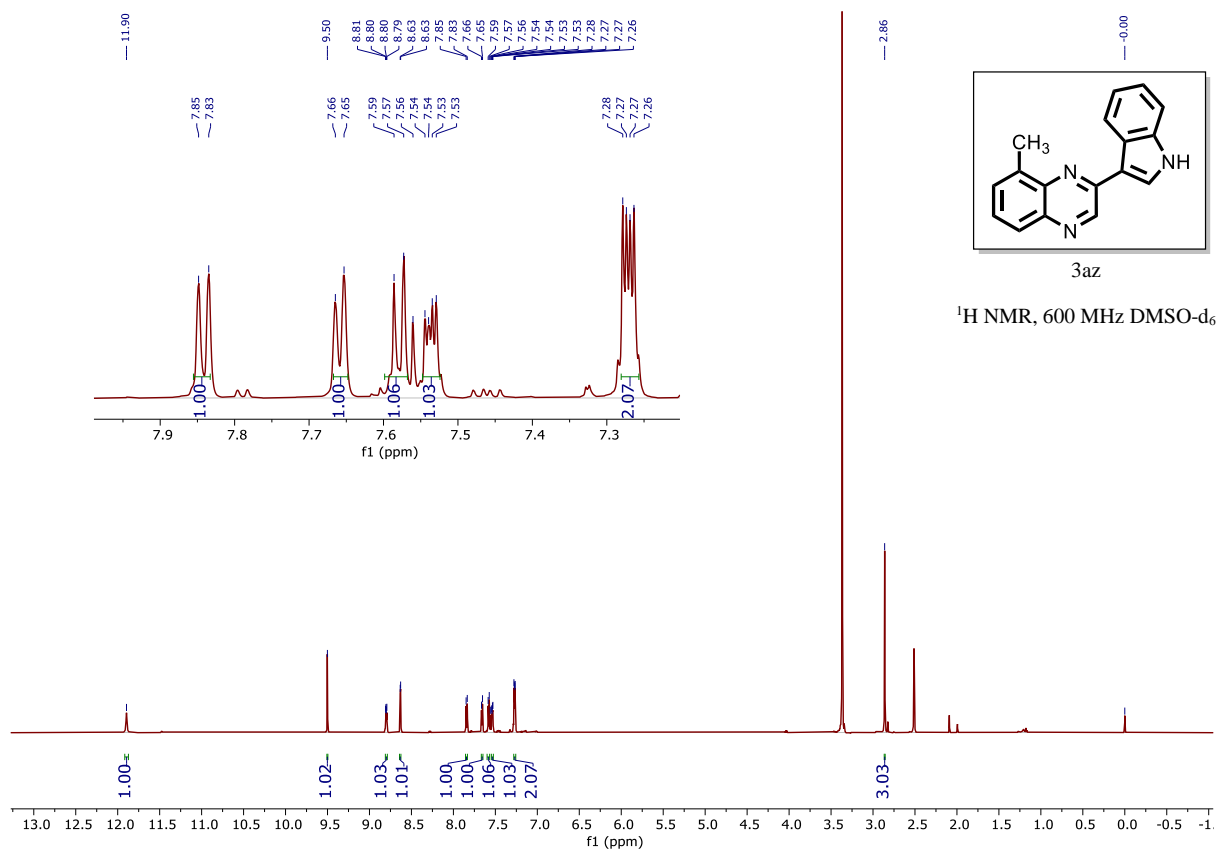

<sup>1</sup>H NMR of 3az

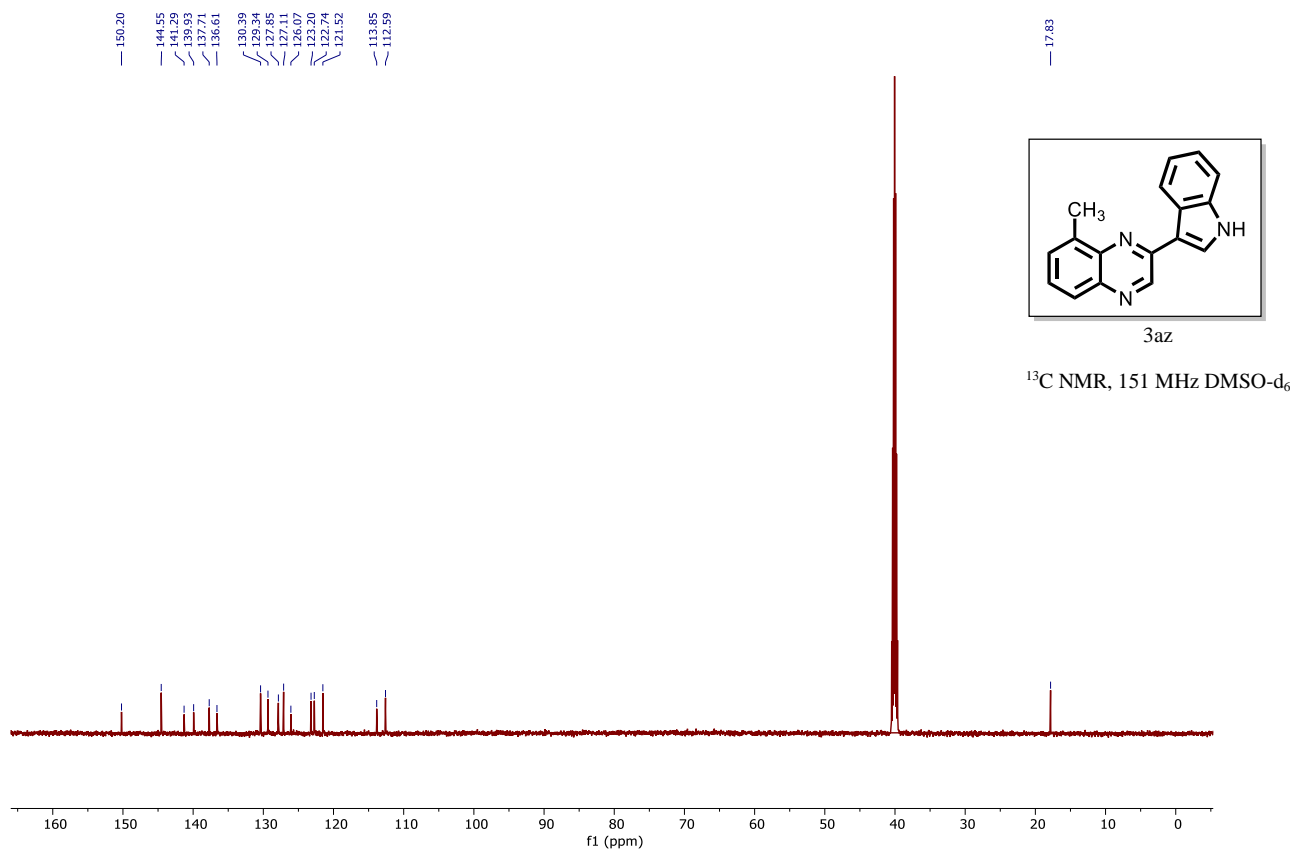

<sup>13</sup>C NMR of 3az

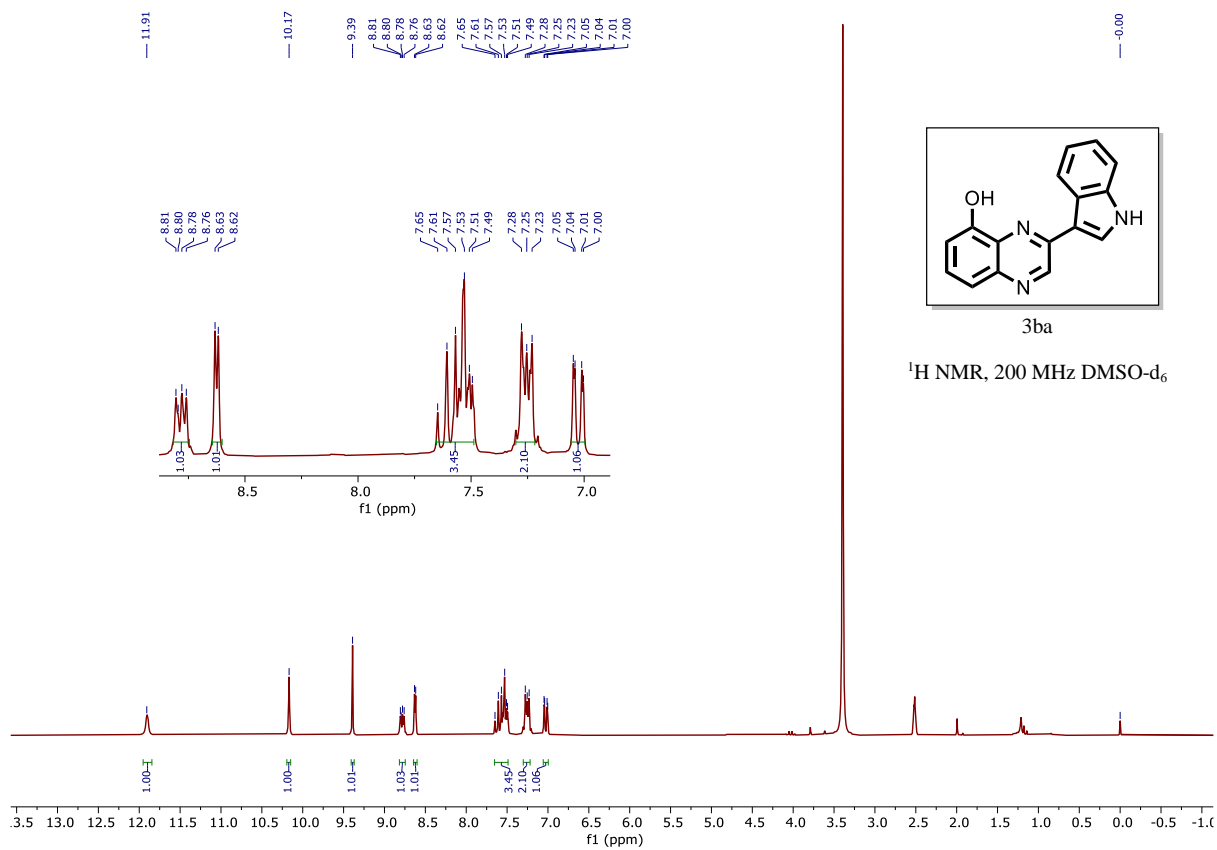

<sup>1</sup>H NMR of 3ba

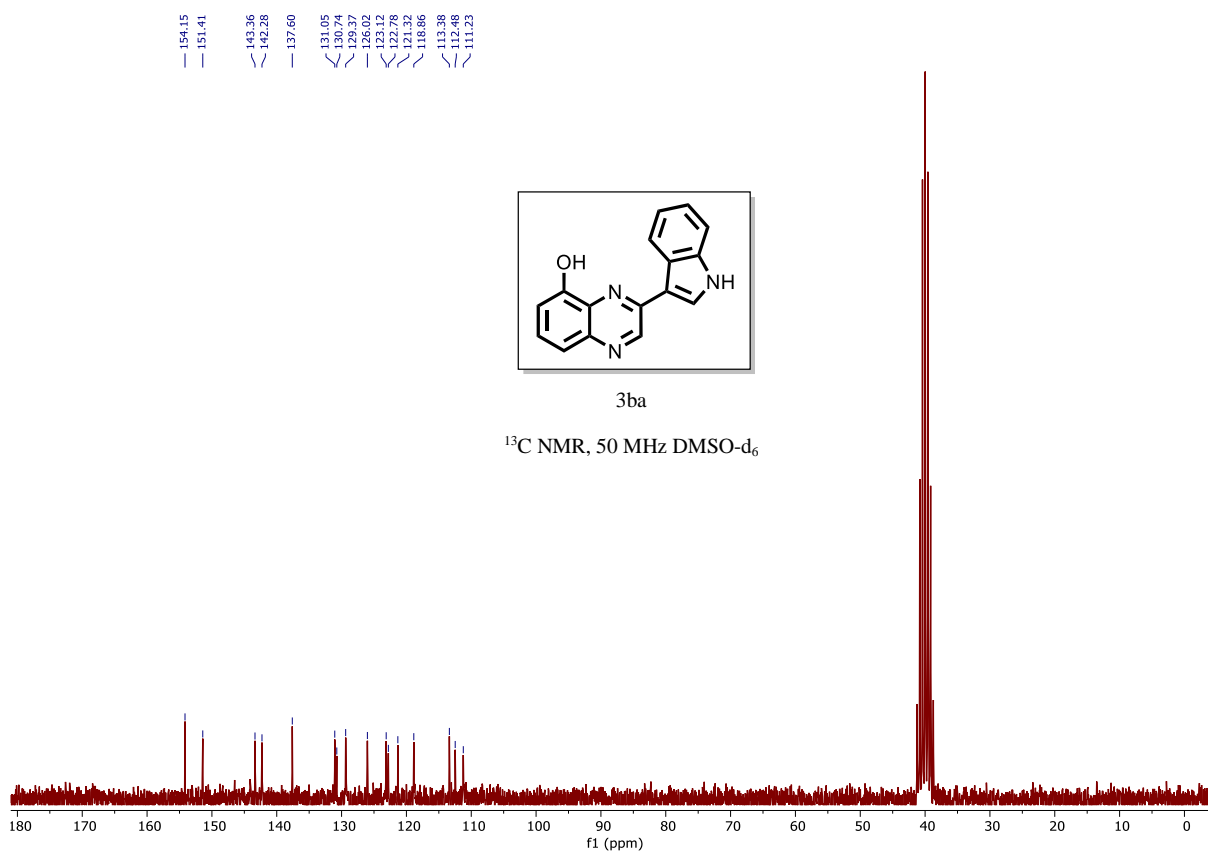

<sup>13</sup>C NMR of 3ba

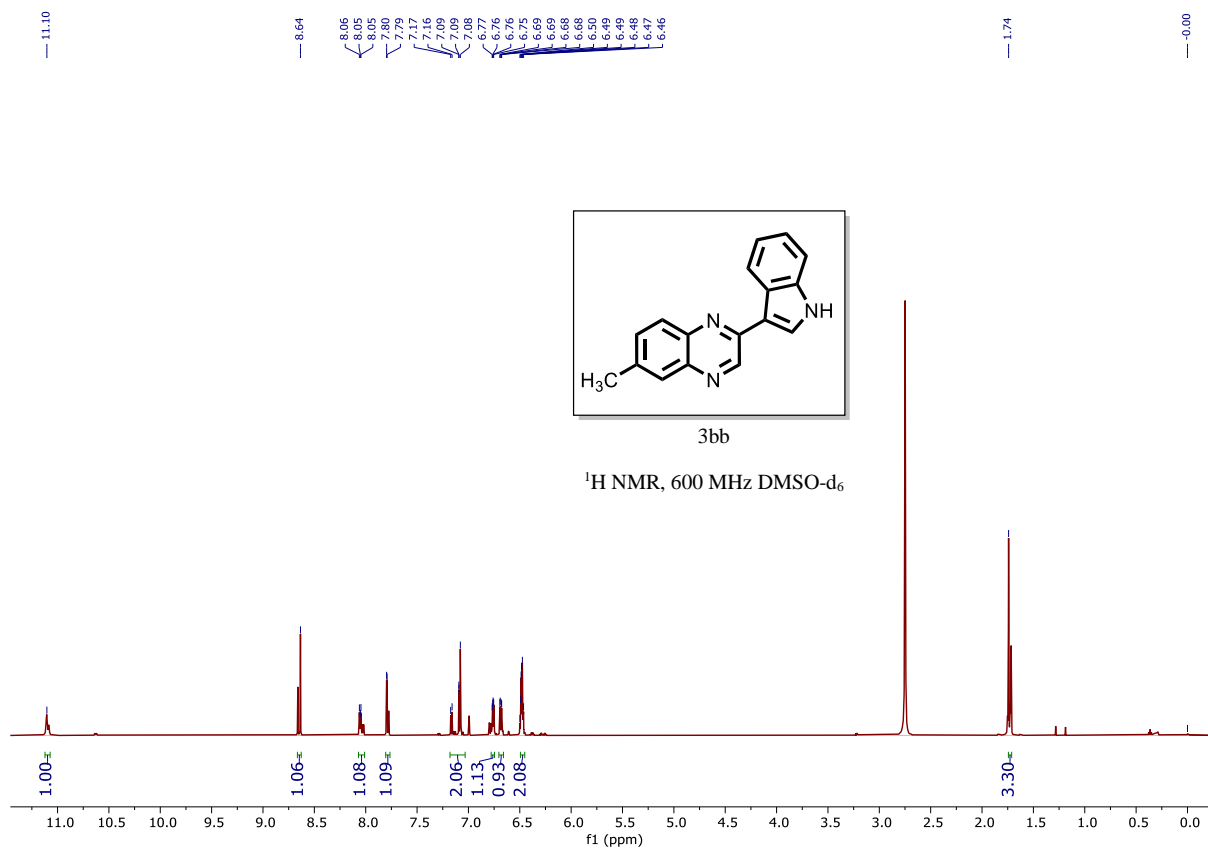

<sup>1</sup>H NMR of 3bb

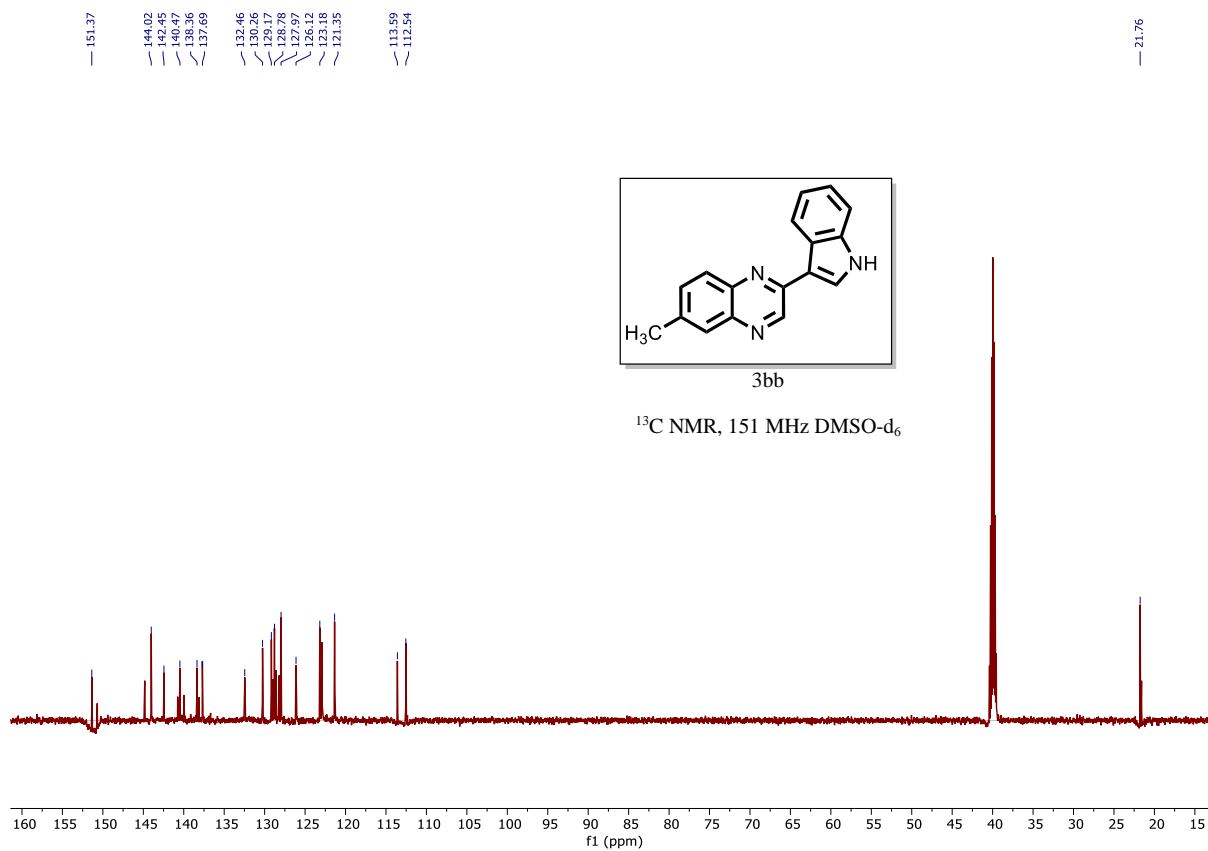

<sup>13</sup>C NMR of 3bb

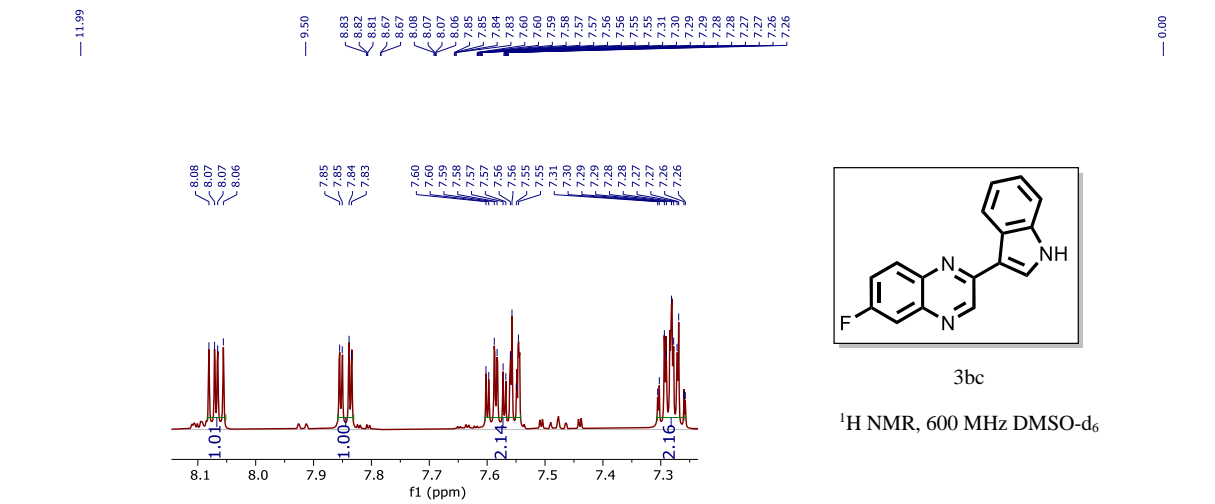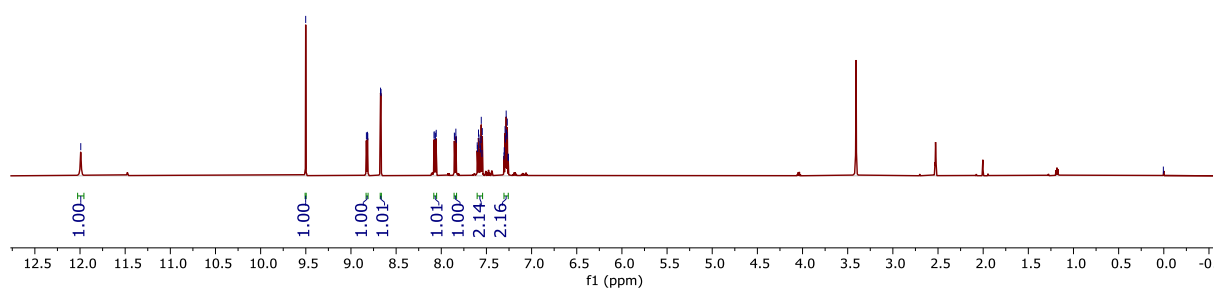

$^1\text{H NMR}$  of 3bc

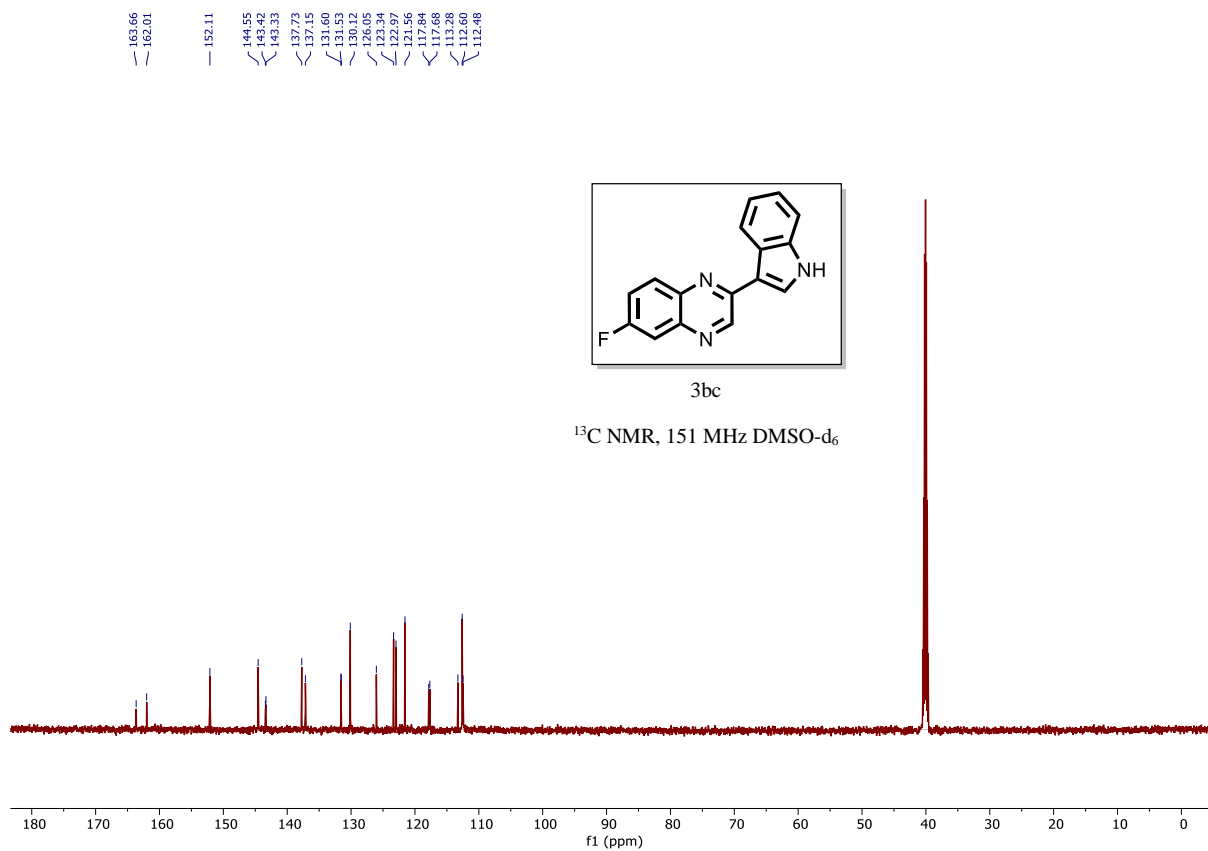

$^{13}\text{C NMR}$  of 3bc

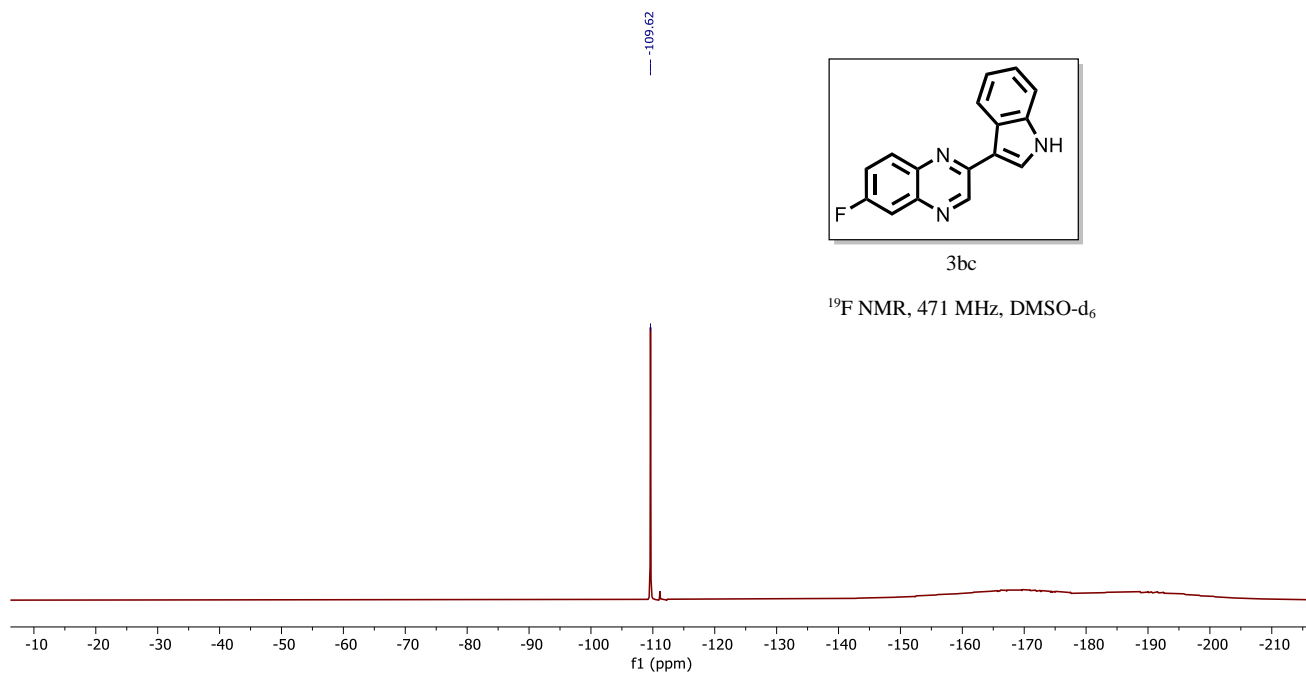

<sup>19</sup>F NMR of 3bc

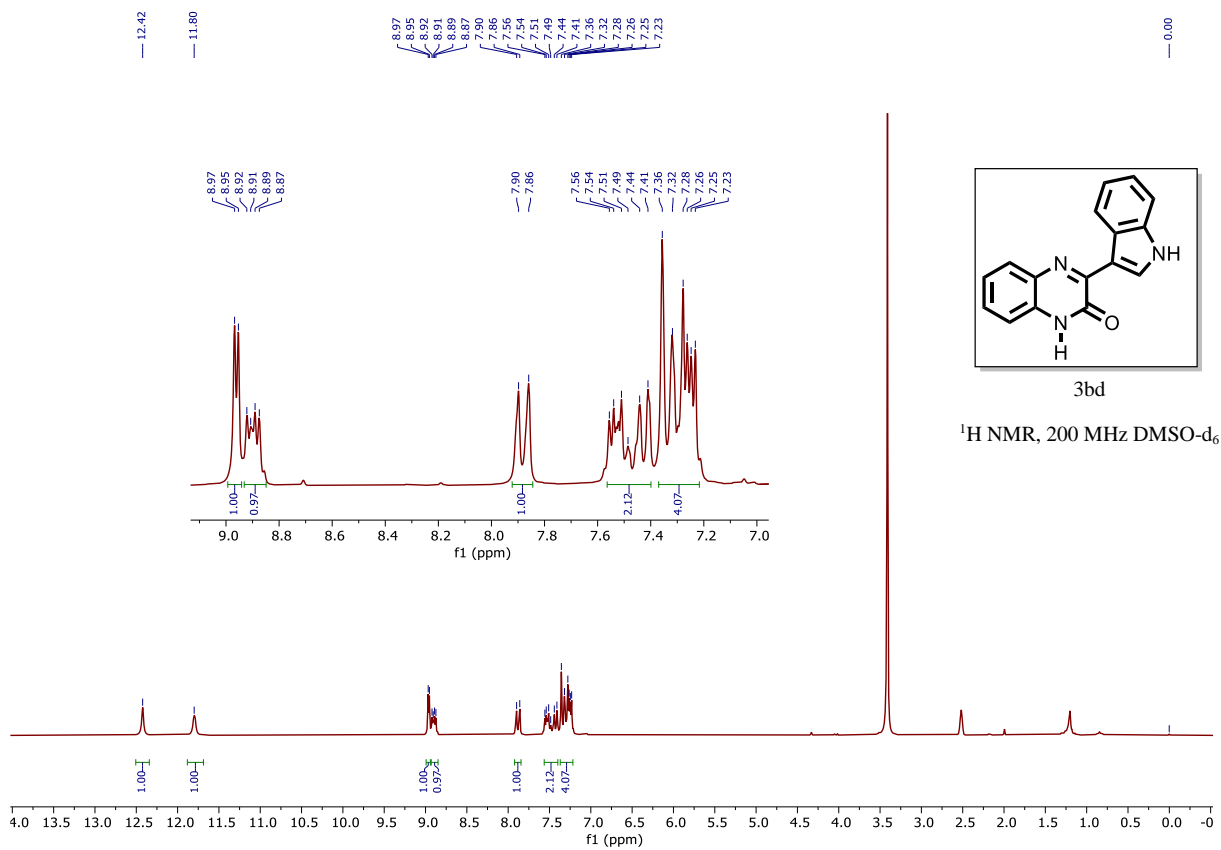

<sup>1</sup>H NMR of 3bd

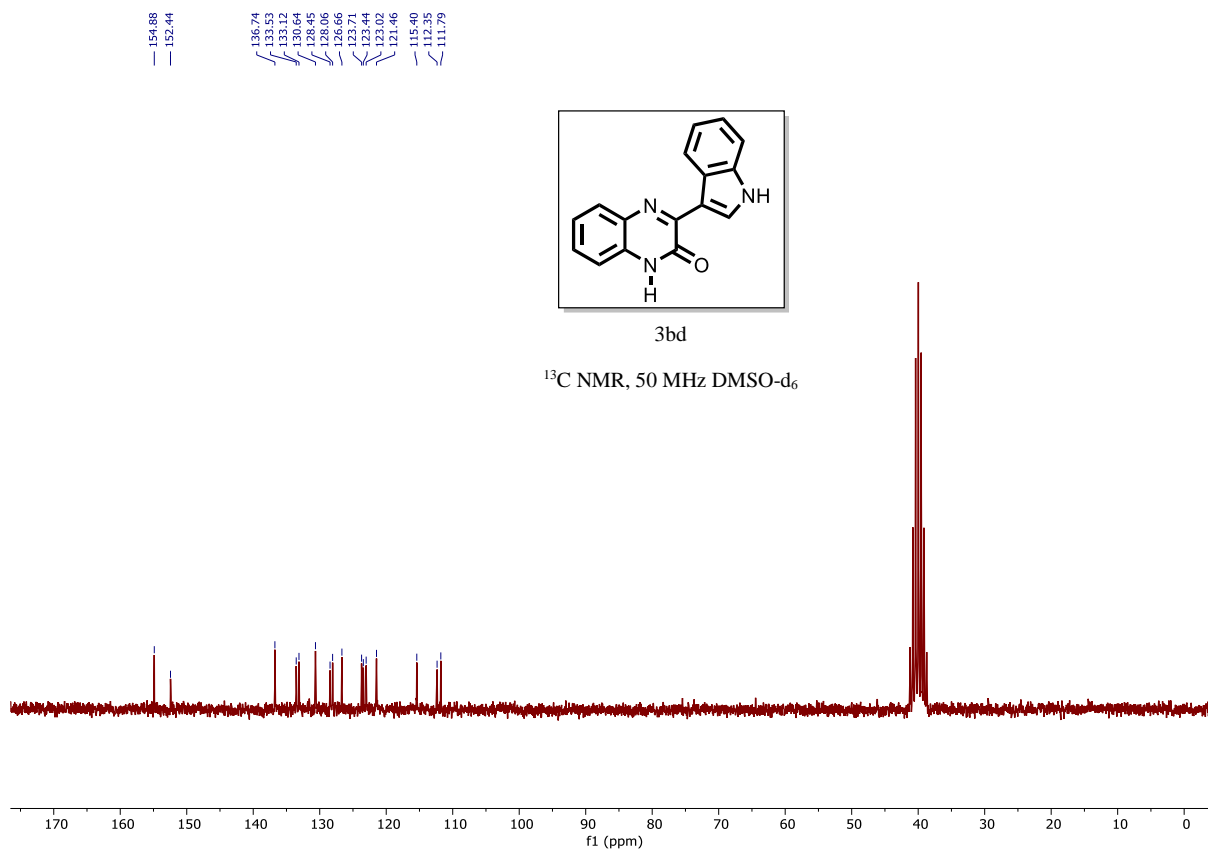

<sup>13</sup>C NMR of 3bd

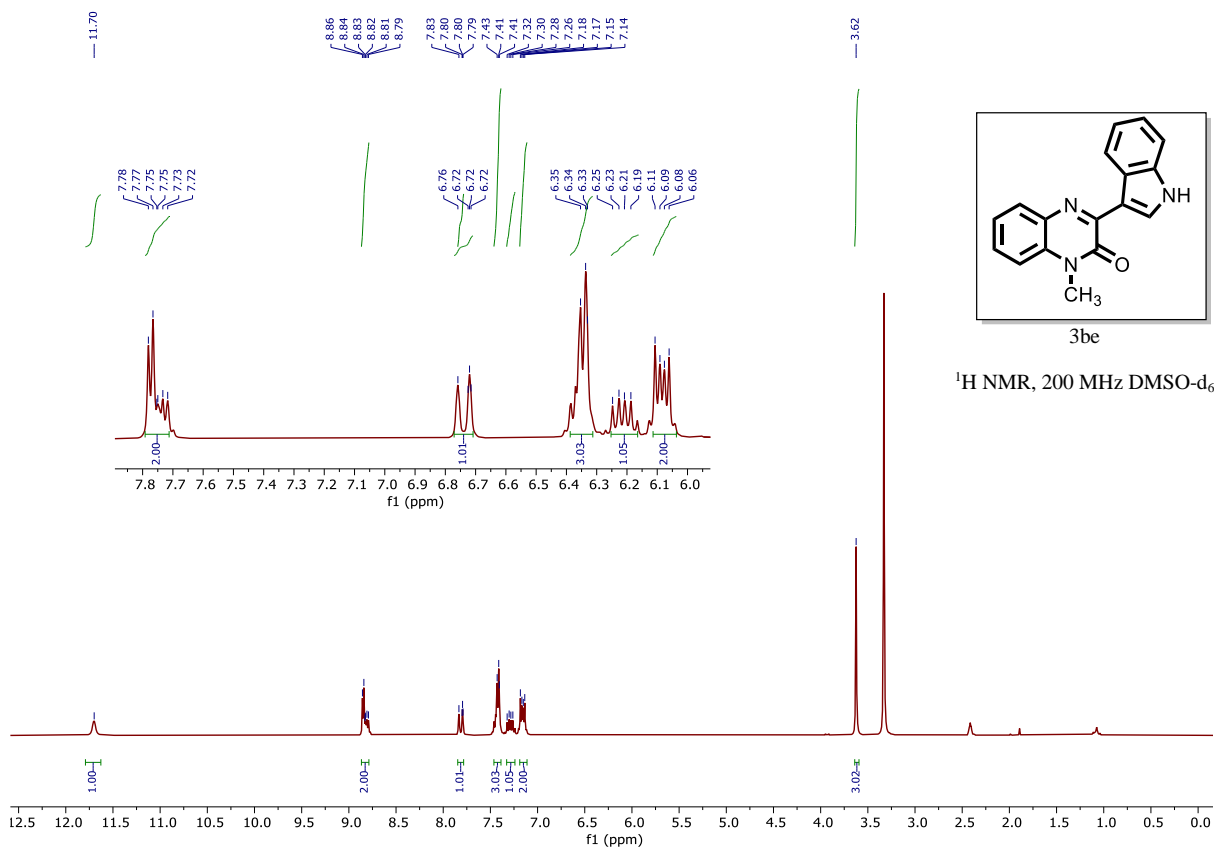

<sup>1</sup>H NMR of 3be

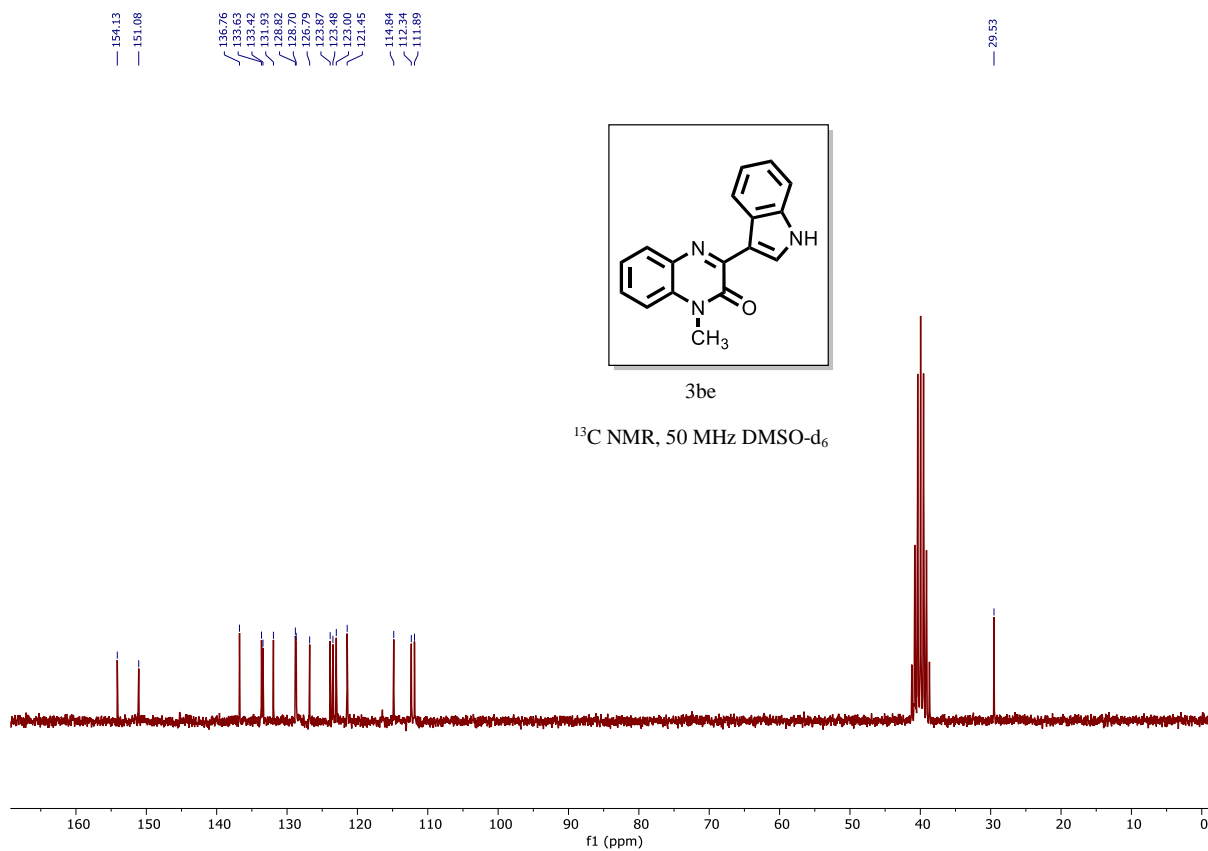

<sup>13</sup>C NMR of 3be

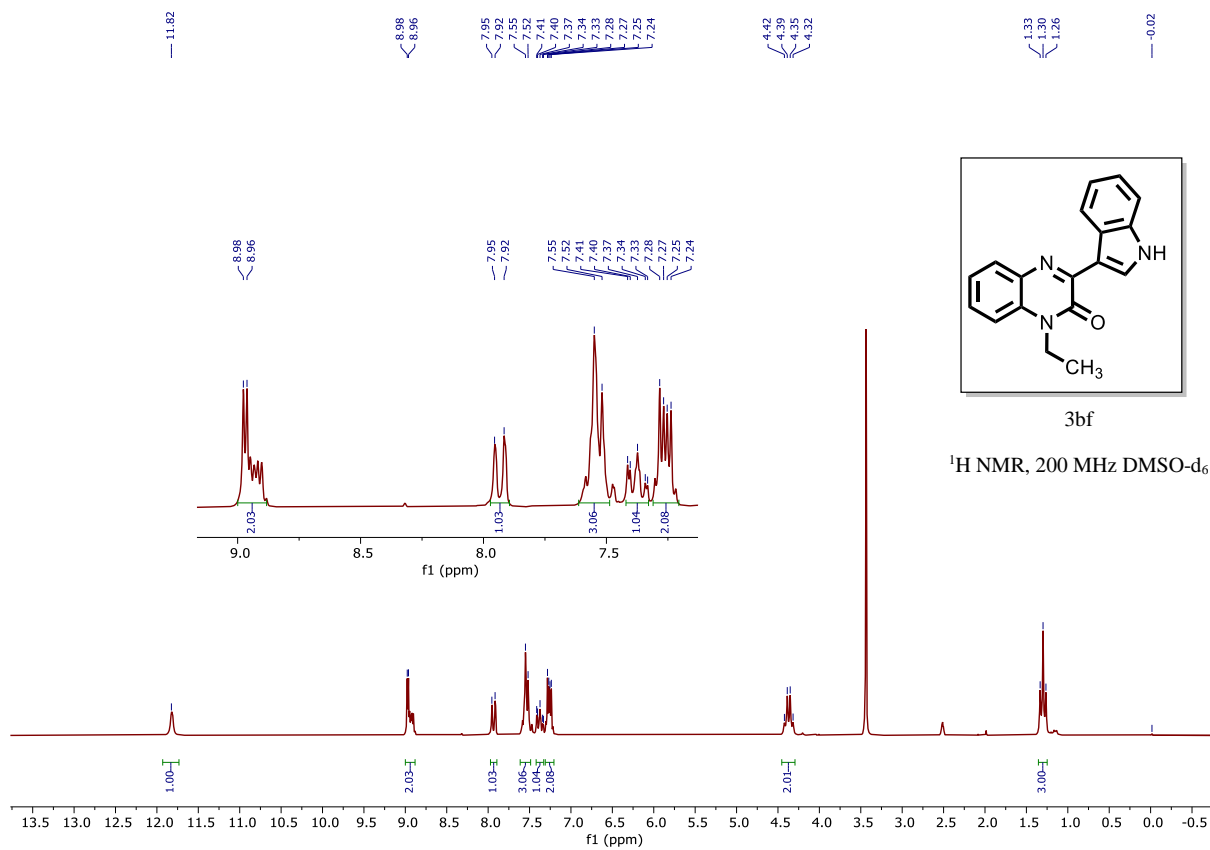

<sup>1</sup>H NMR of 3bf

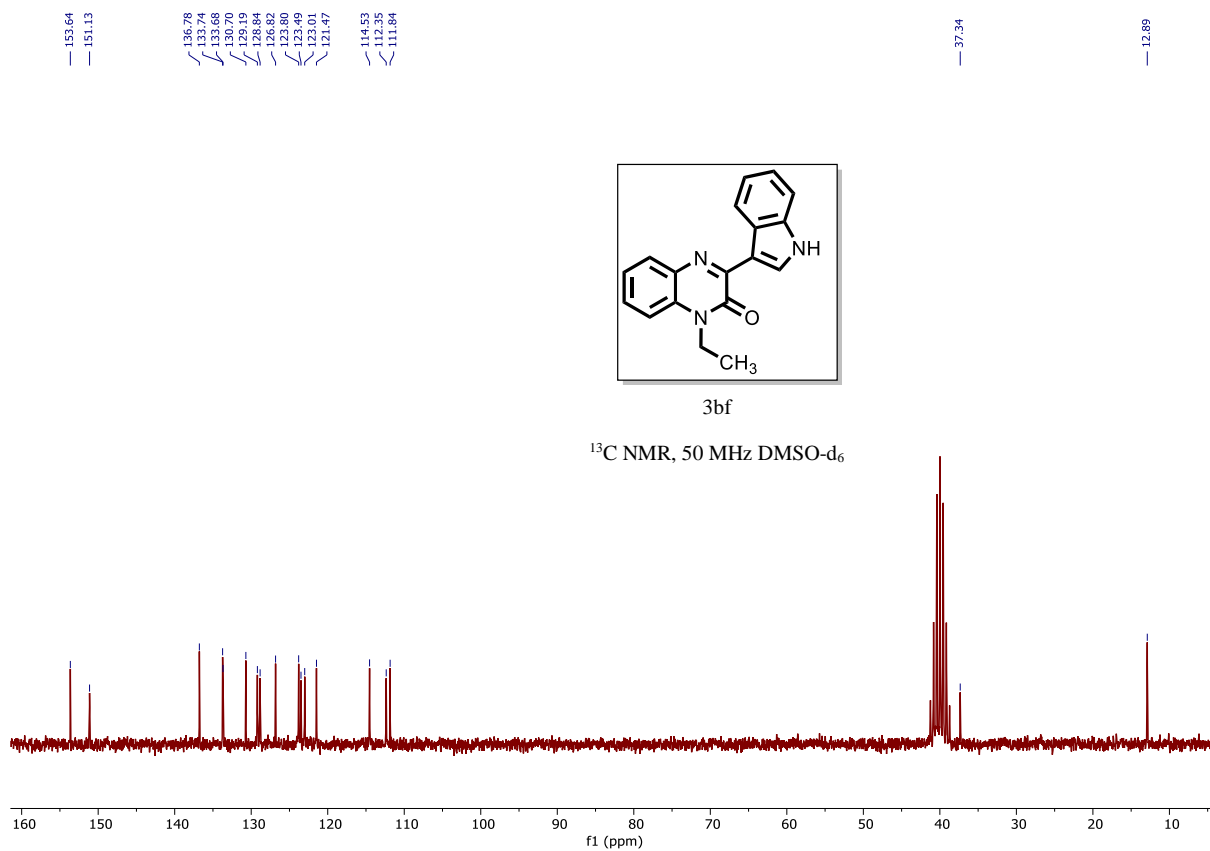

<sup>13</sup>C NMR of 3bf



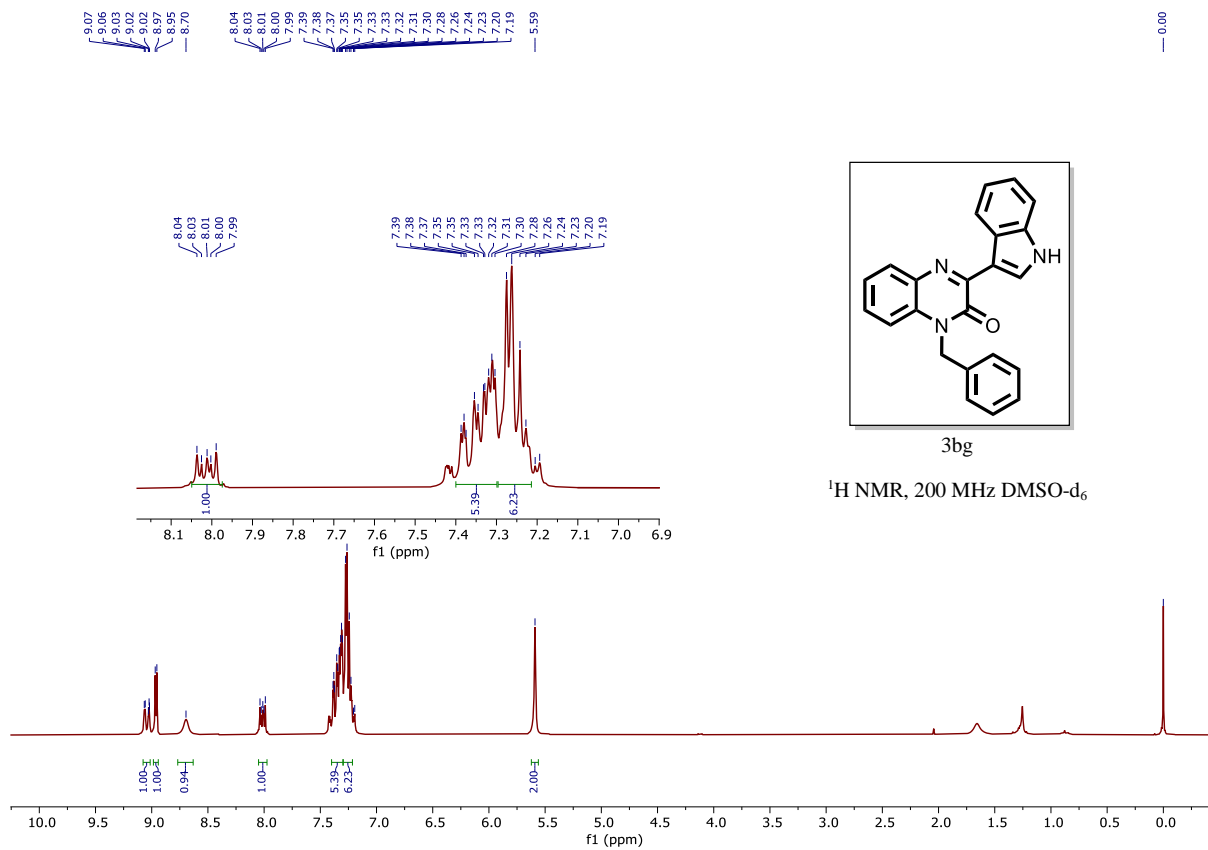

<sup>1</sup>H NMR of 3bg

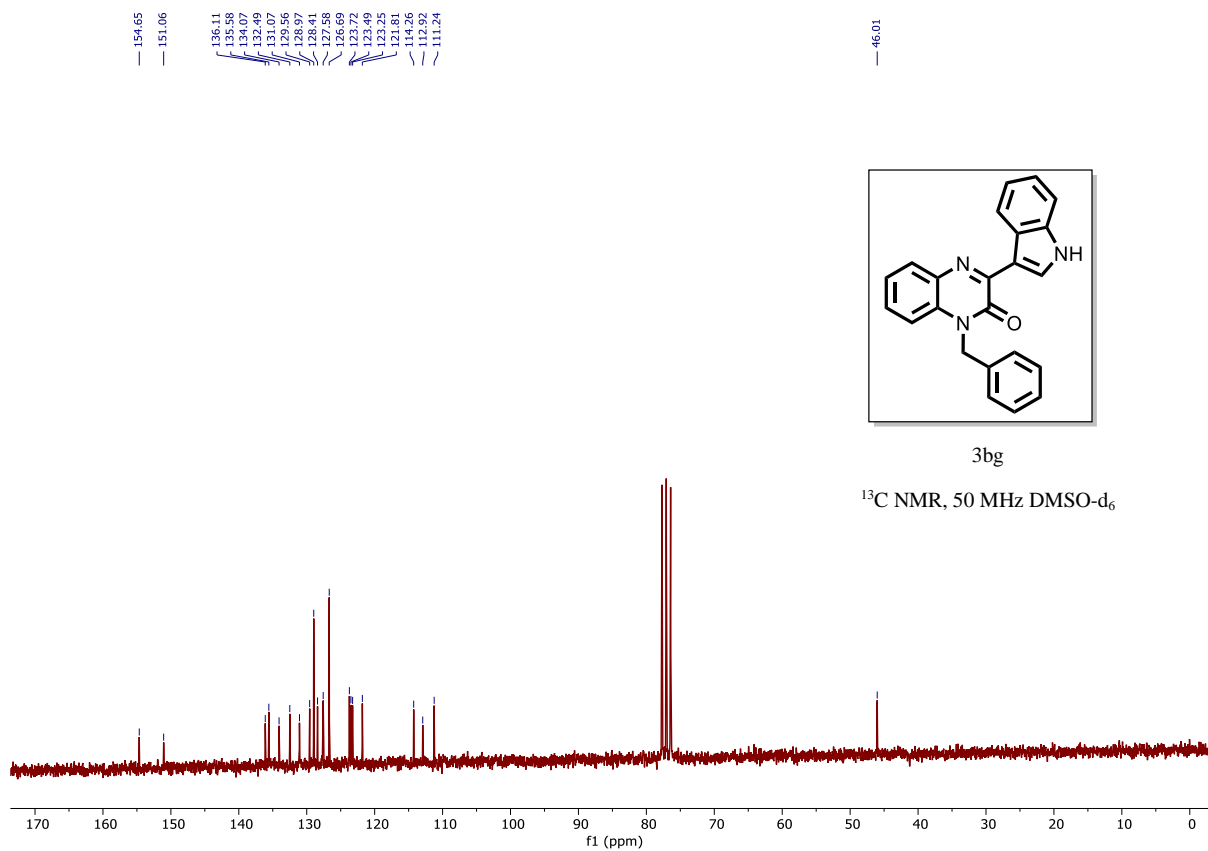

<sup>13</sup>C NMR of 3bg

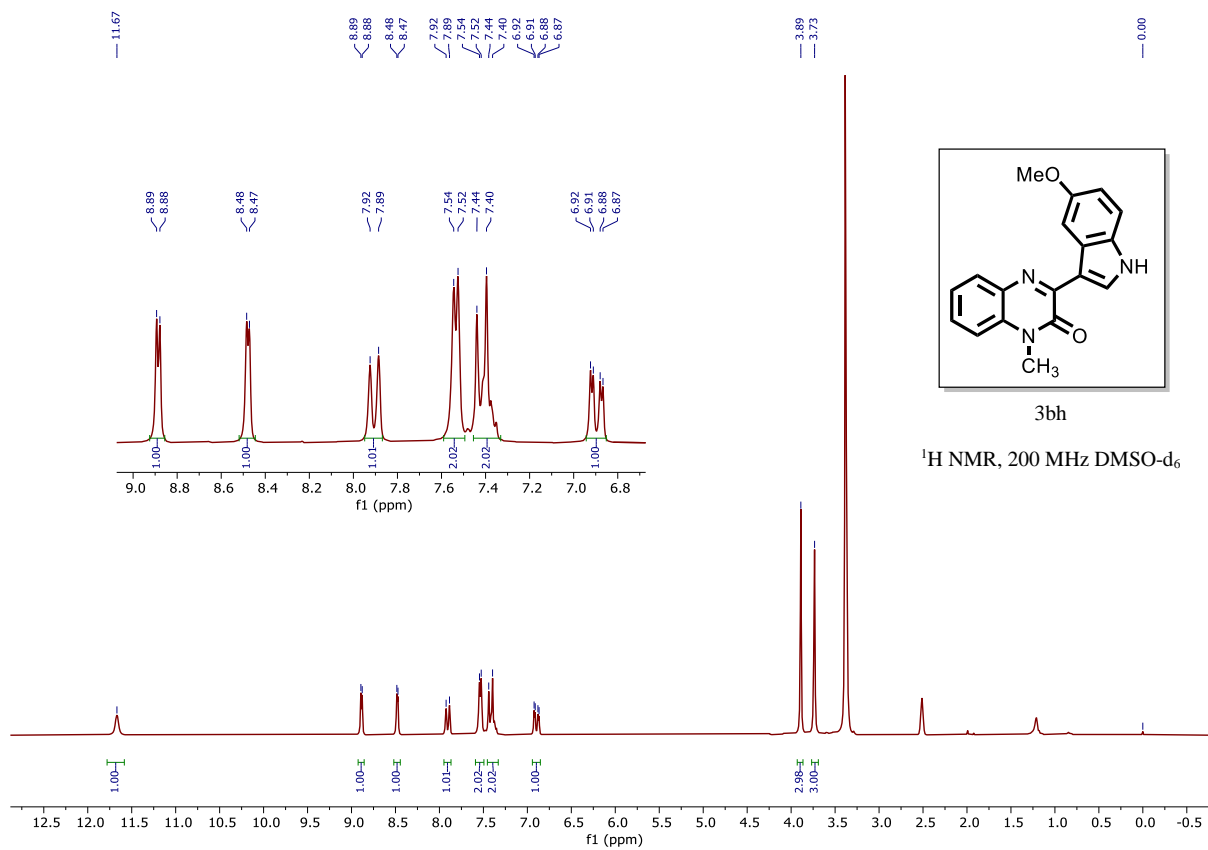

**<sup>1</sup>H NMR of 3bh**

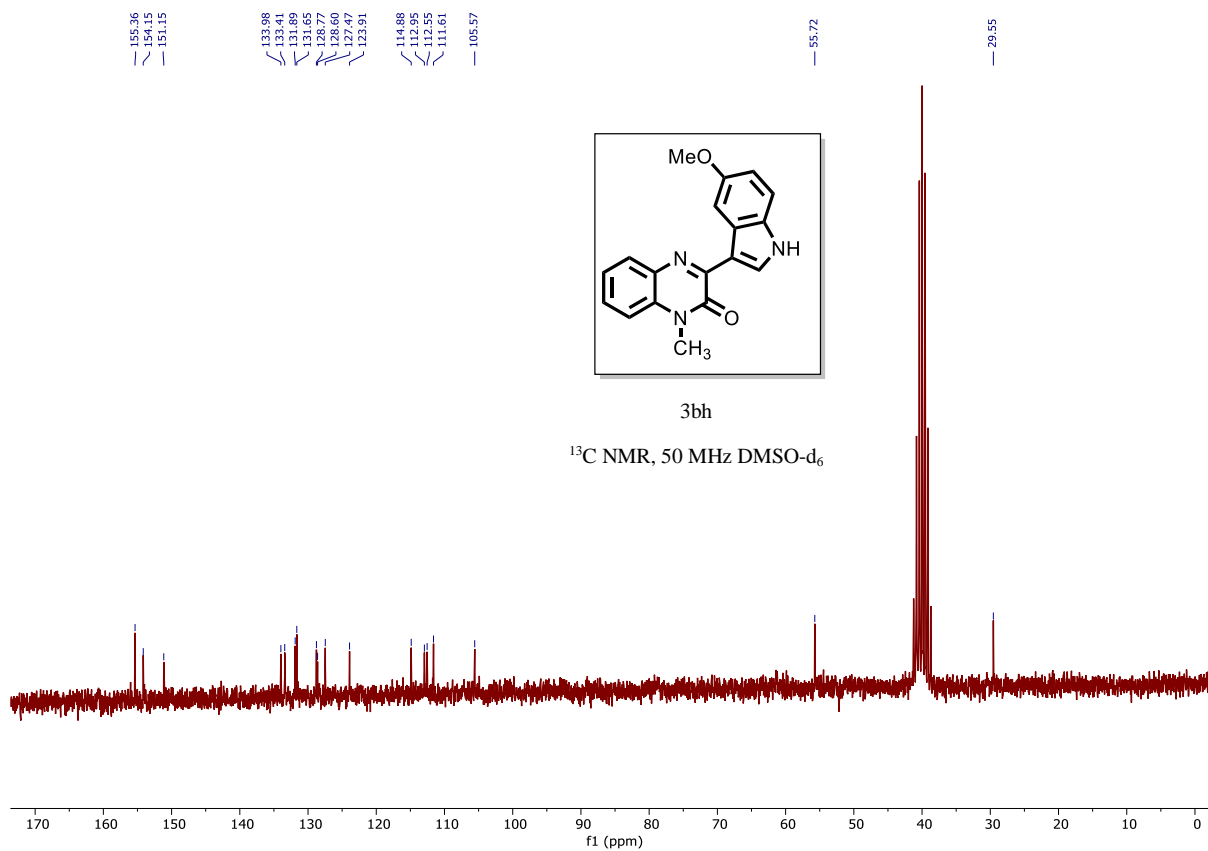

**<sup>13</sup>C NMR of 3bh**

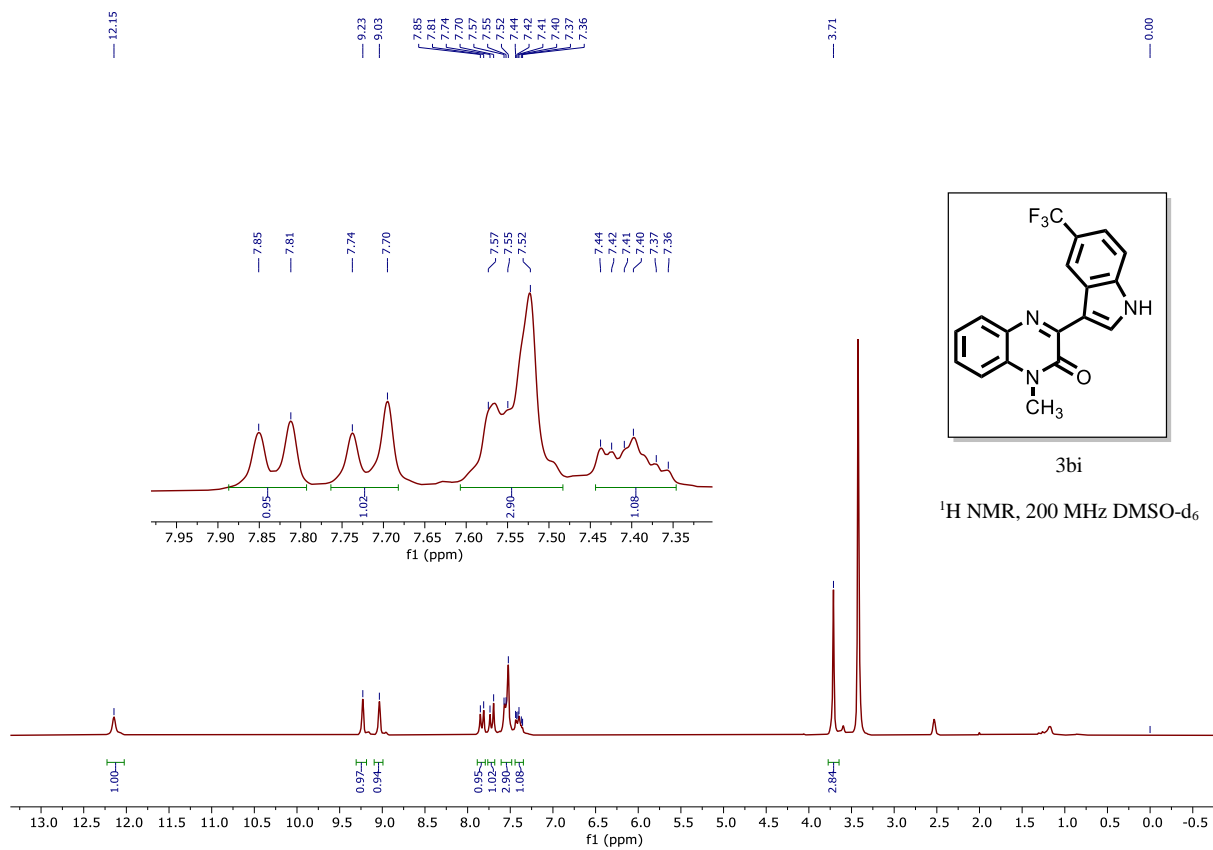

<sup>1</sup>H NMR of 3bi

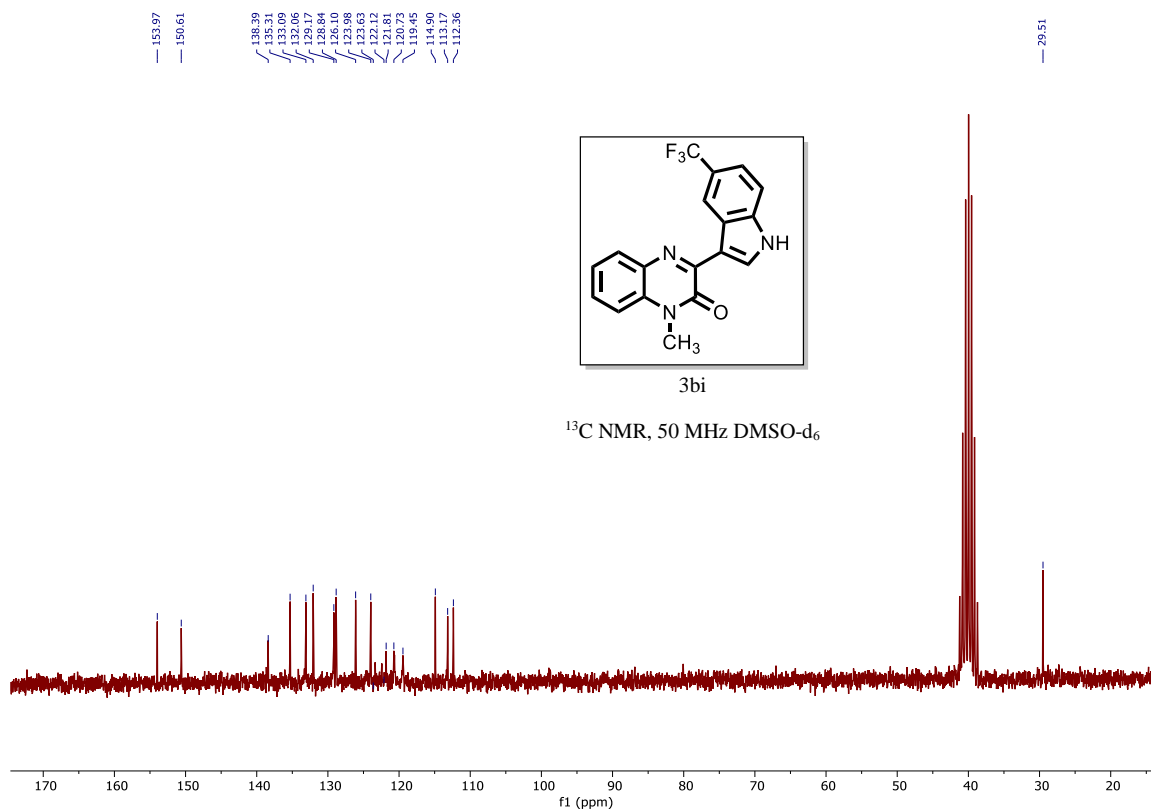

<sup>13</sup>C NMR of 3bi

-58.67

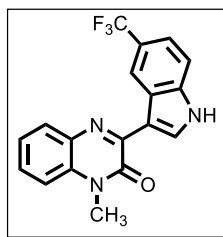

3bi

<sup>19</sup>F NMR, 471 MHz DMSO-d<sub>6</sub>

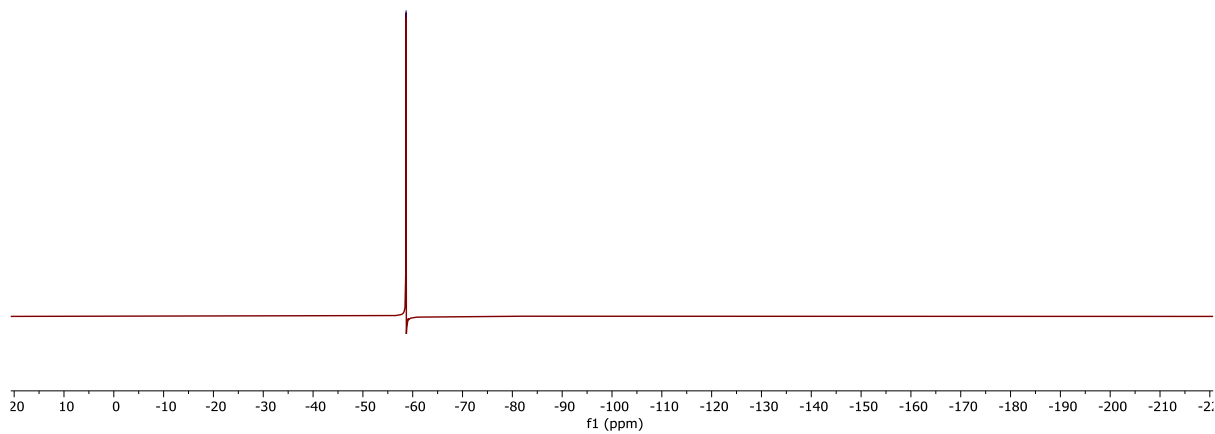

<sup>19</sup>F NMR of 3bi

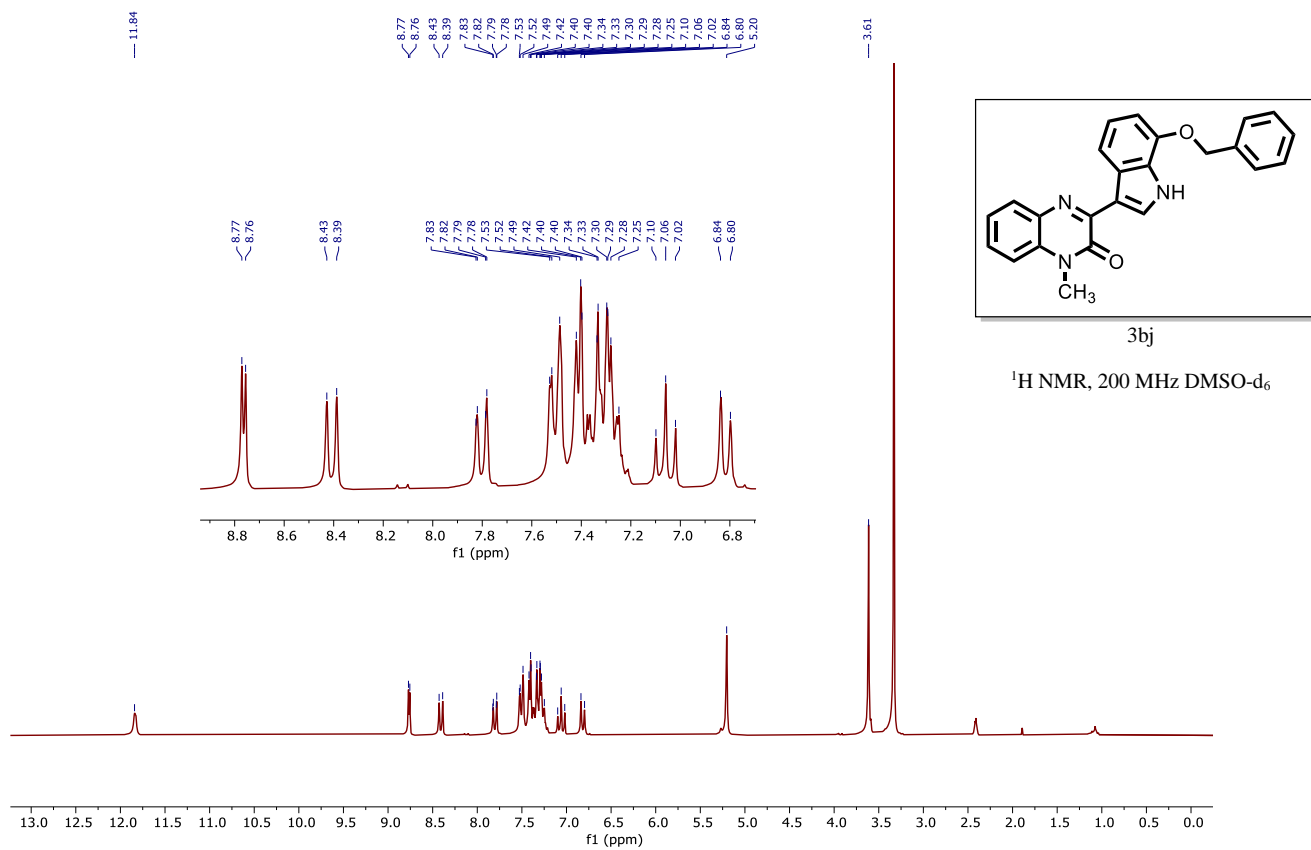

<sup>1</sup>H NMR of 3bj

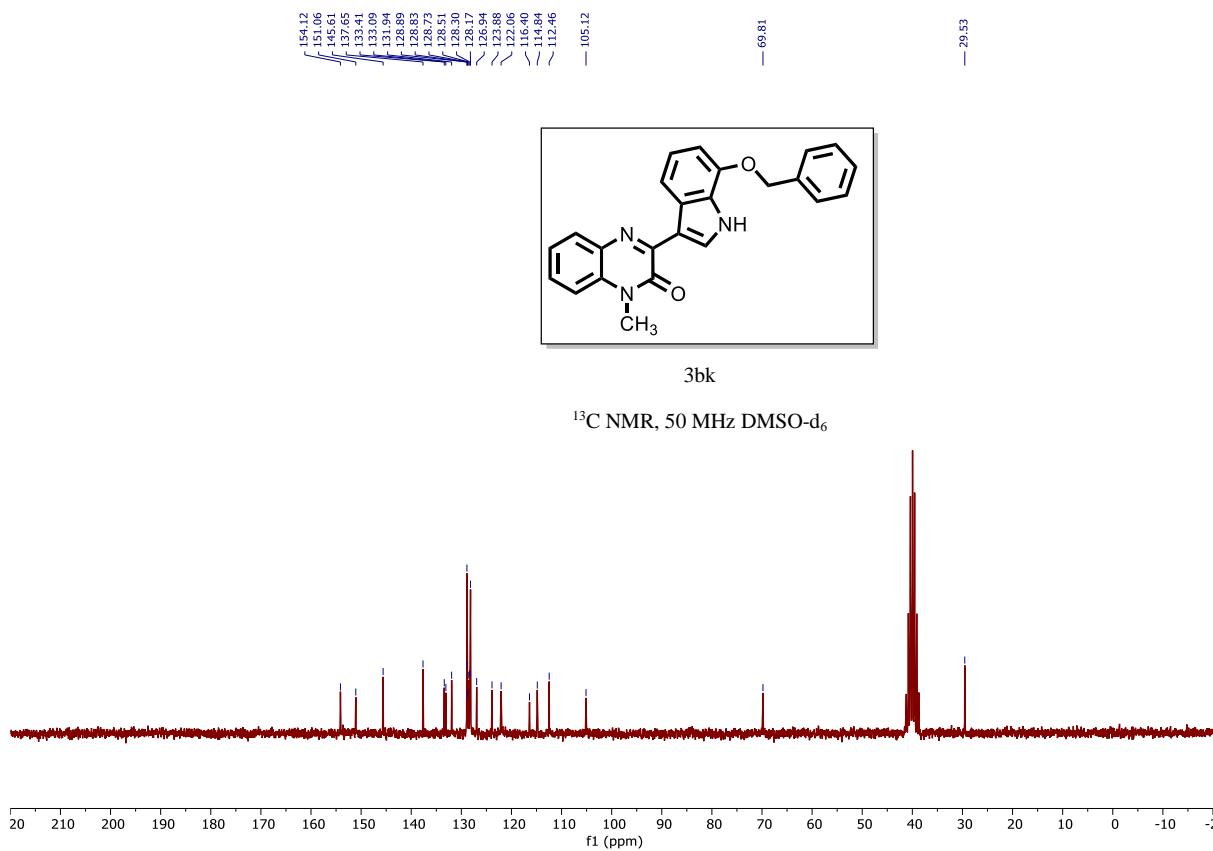

<sup>13</sup>C NMR of 3bj

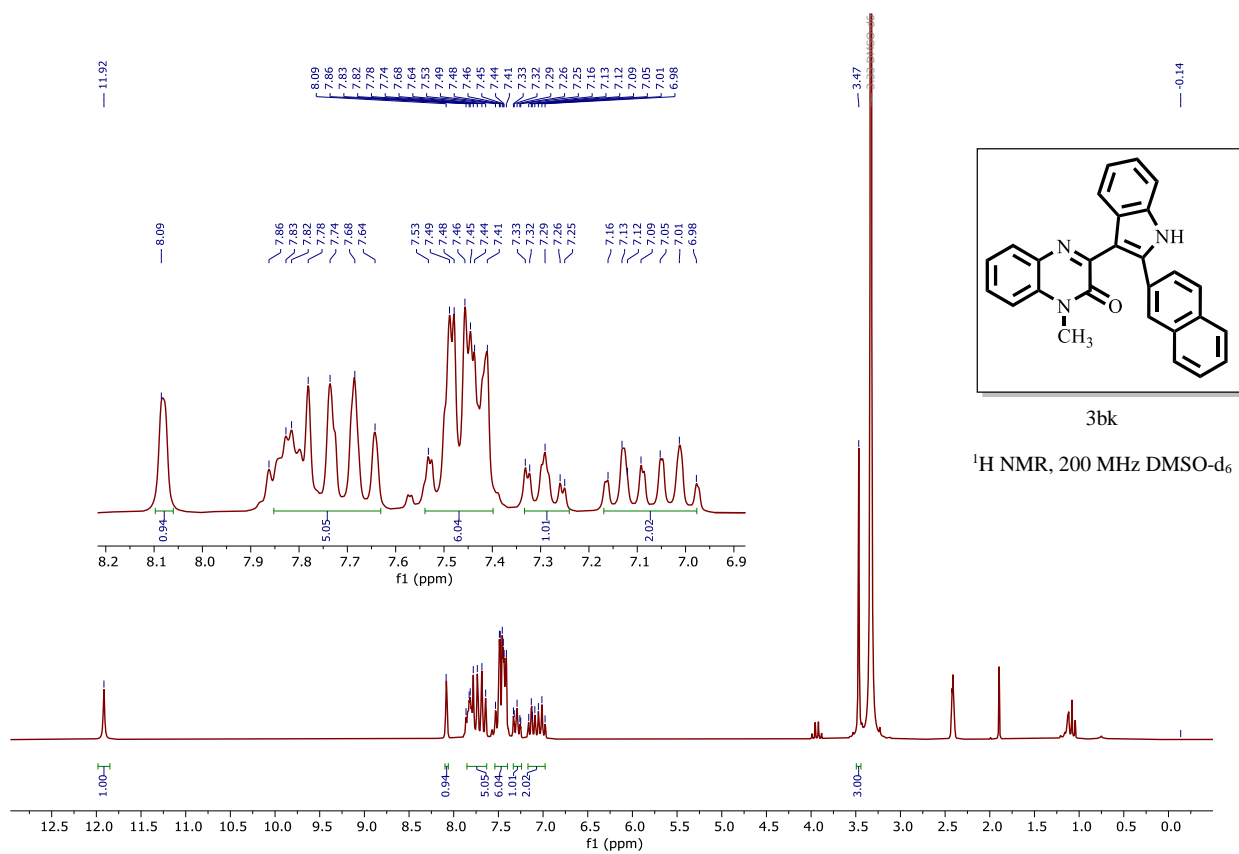

**<sup>1</sup>H NMR of 3bk**

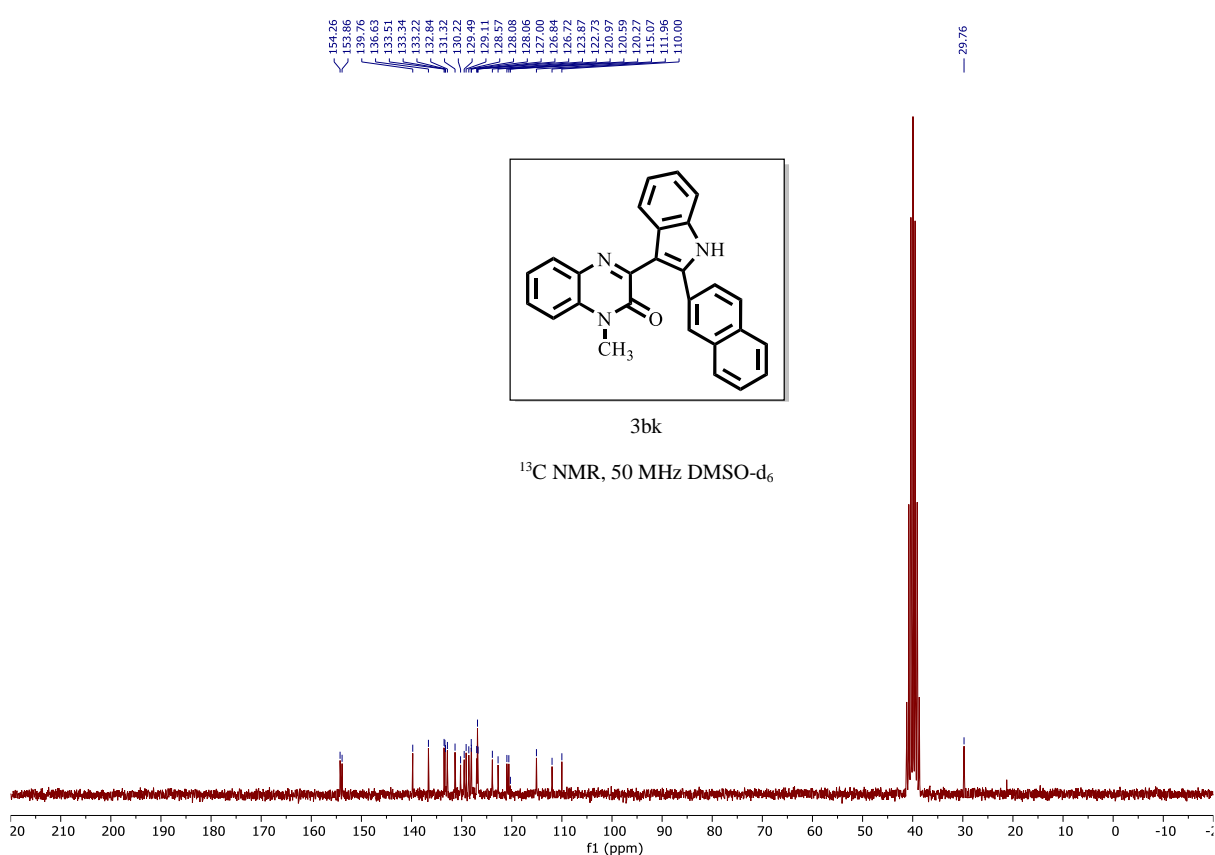

**<sup>13</sup>C NMR of 3bk**

106-42-3

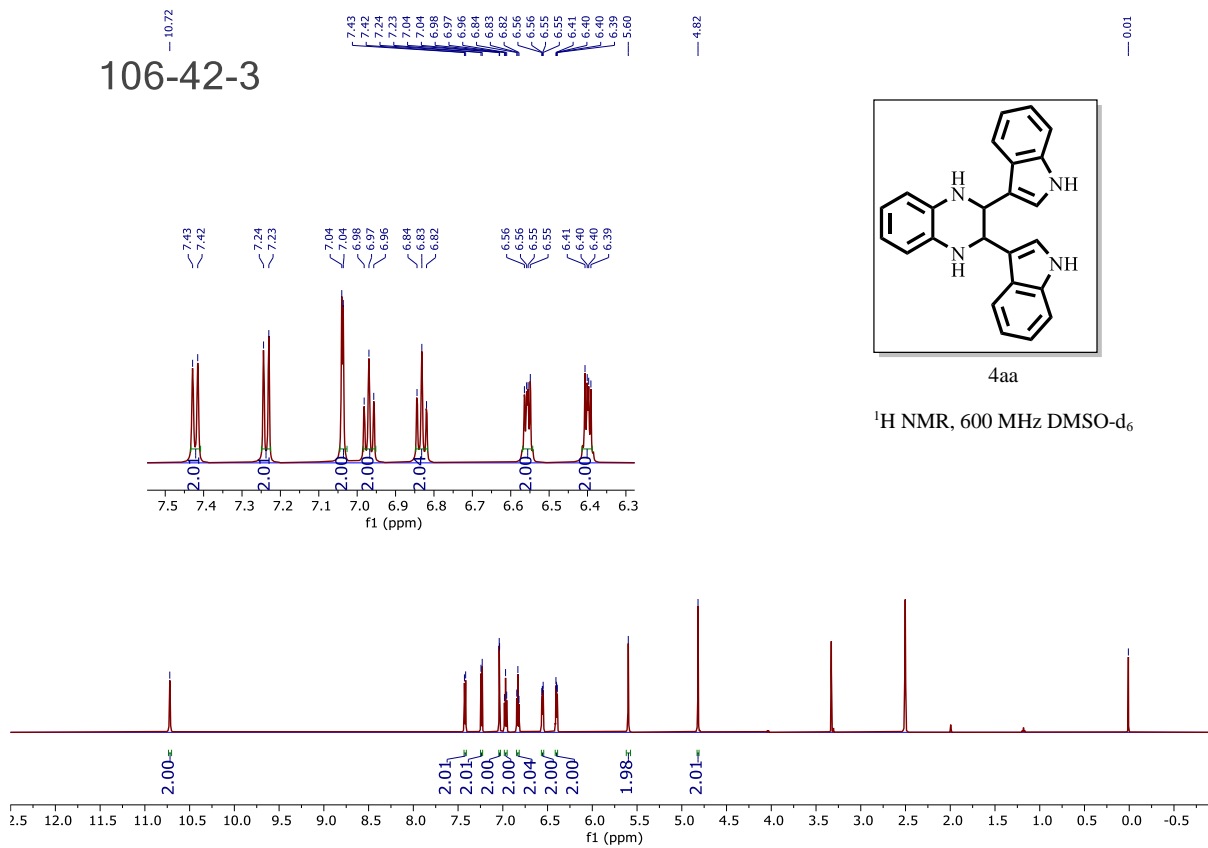

<sup>1</sup>H NMR of 4aa

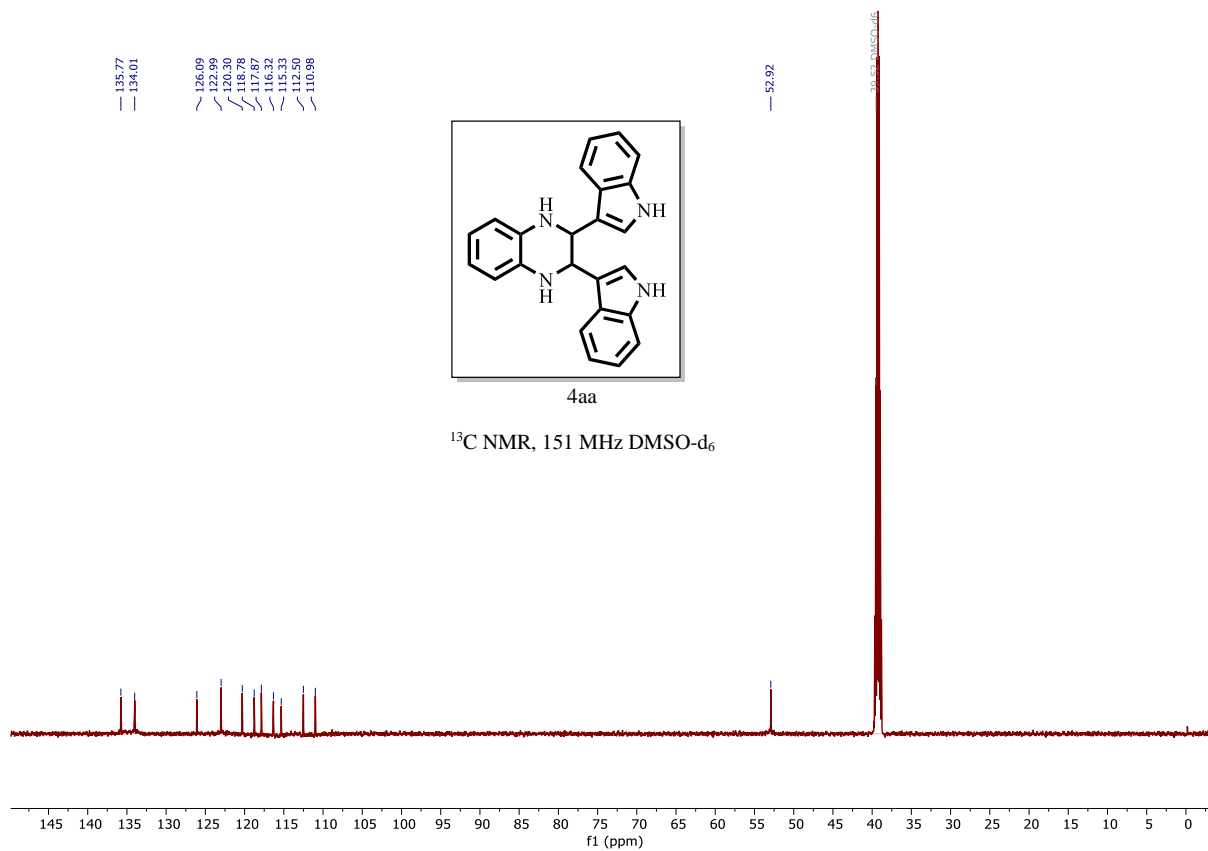

<sup>13</sup>C NMR of 4aa

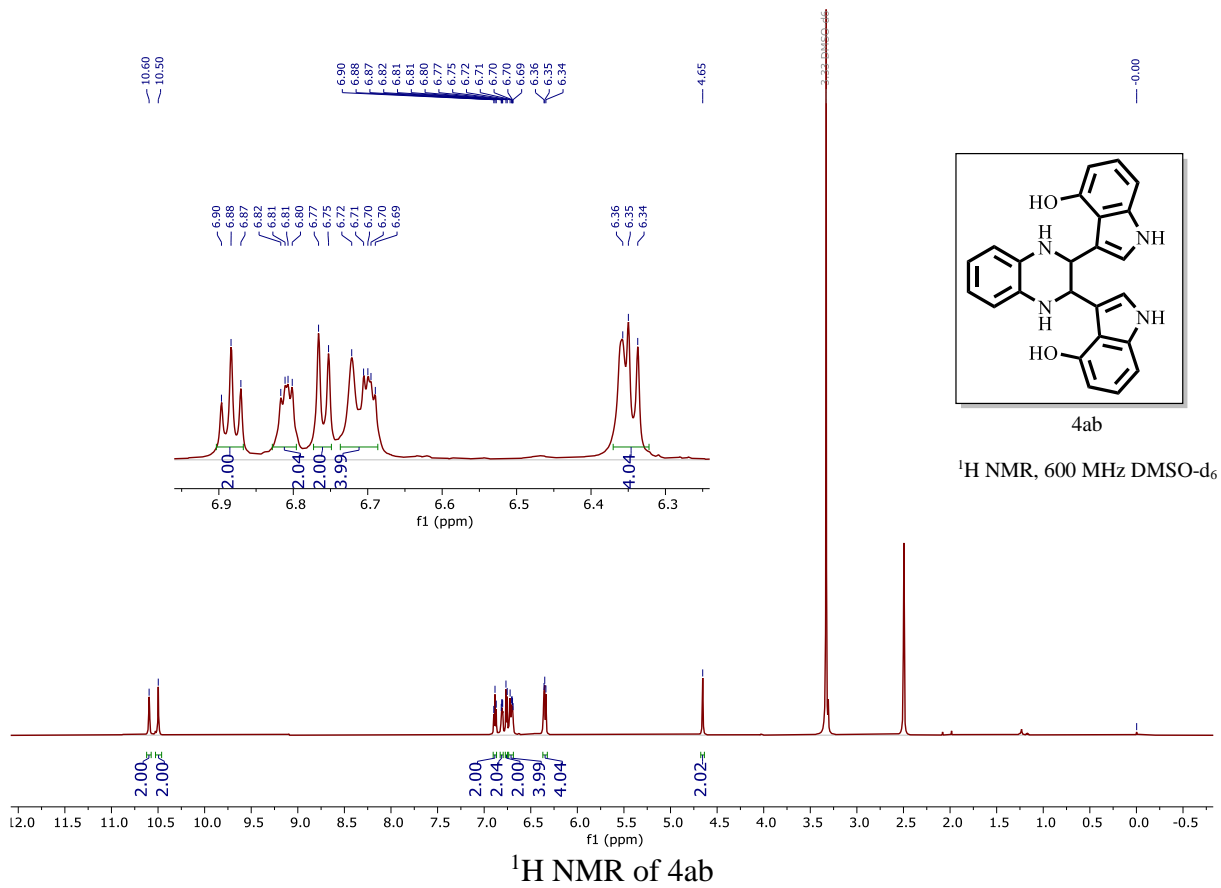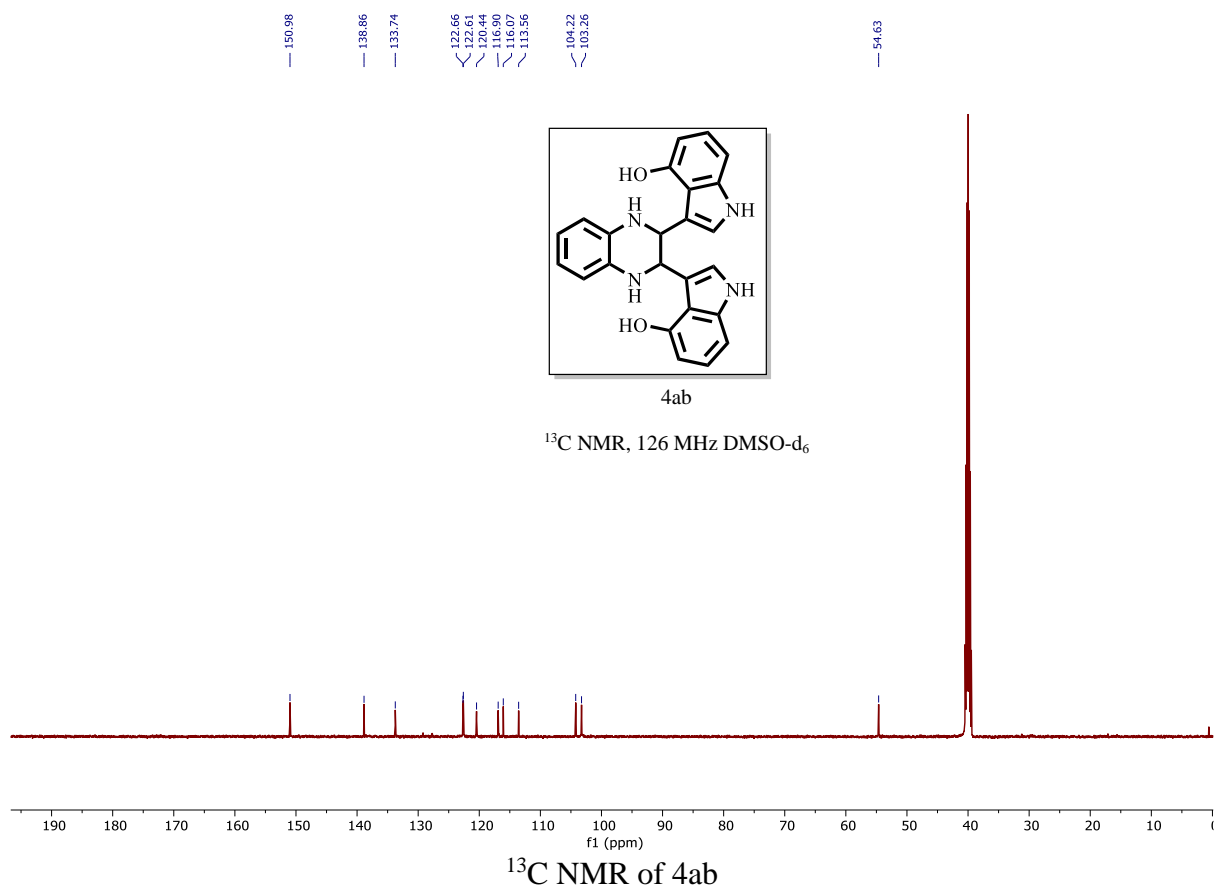



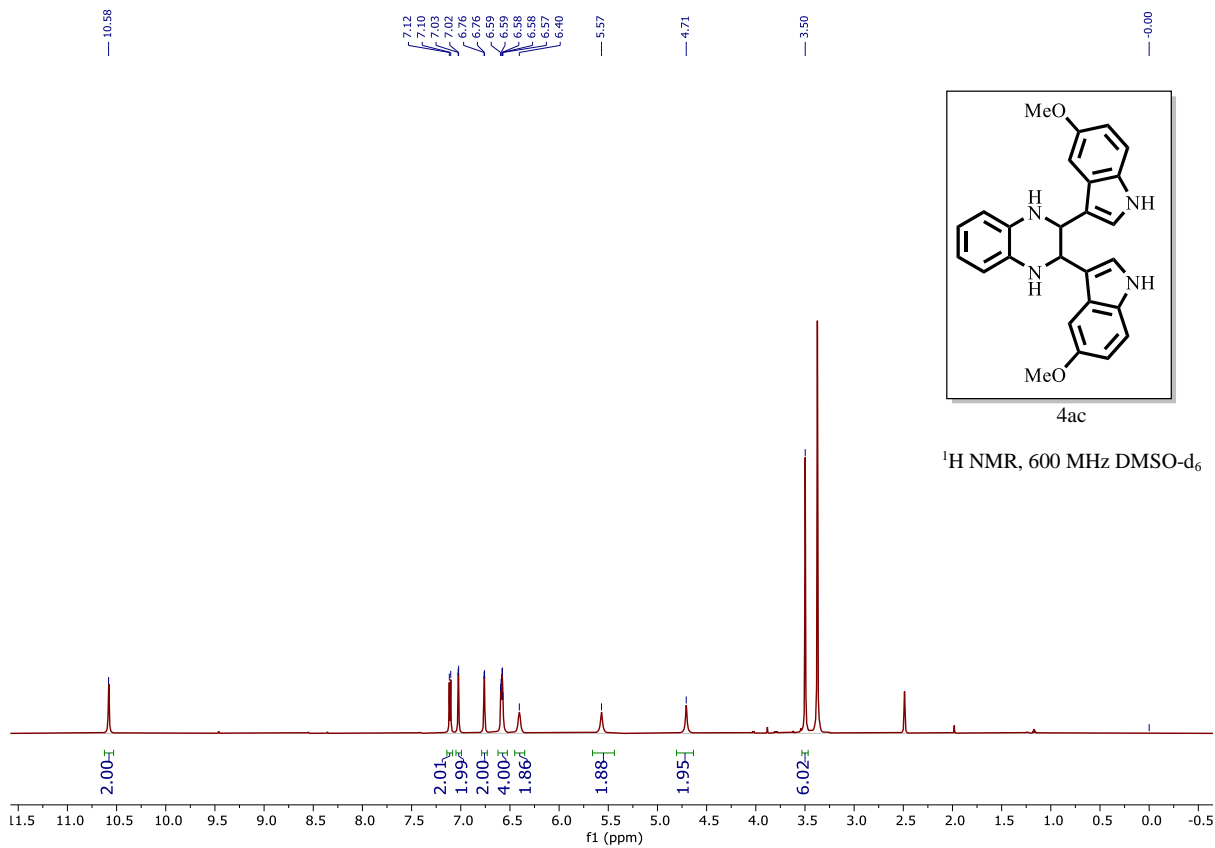

<sup>1</sup>H NMR of 4ac

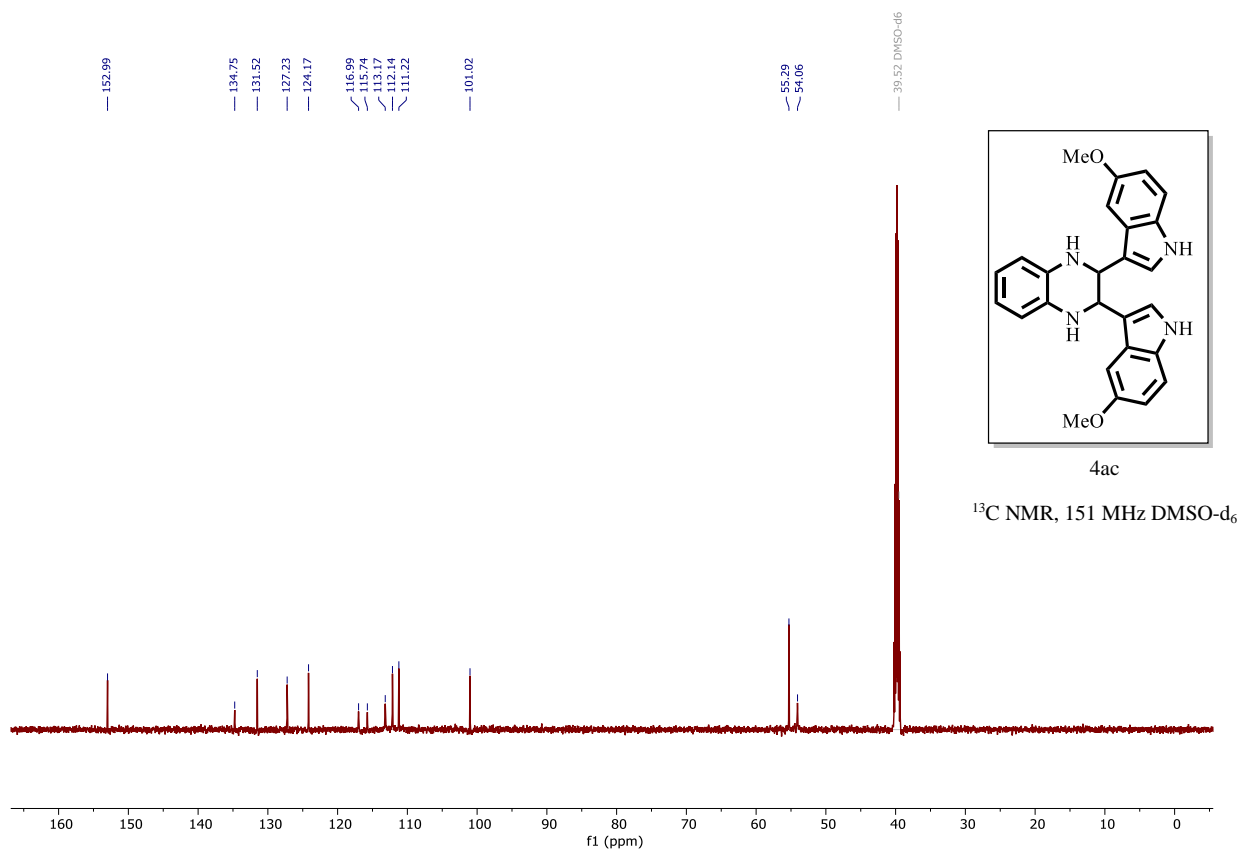

<sup>13</sup>C NMR of 4ac

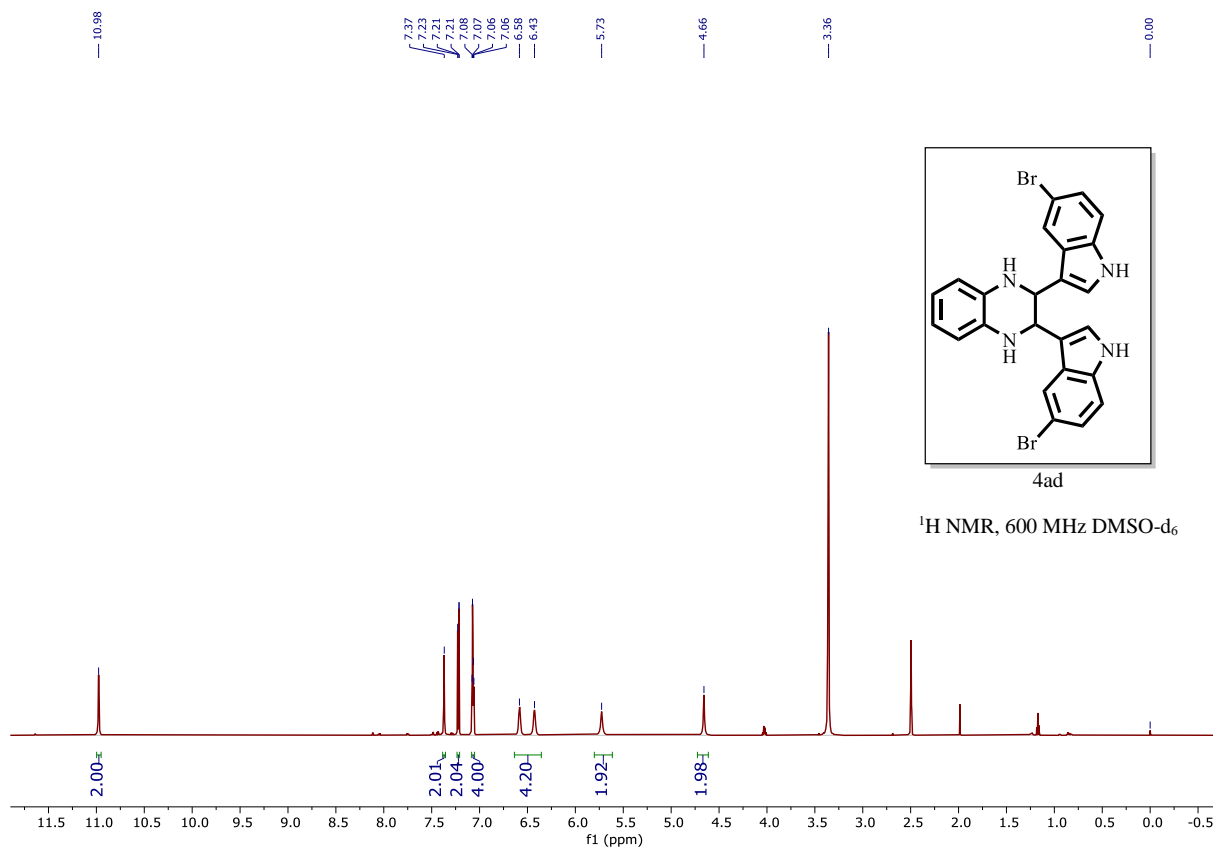

<sup>1</sup>H NMR of 4ad

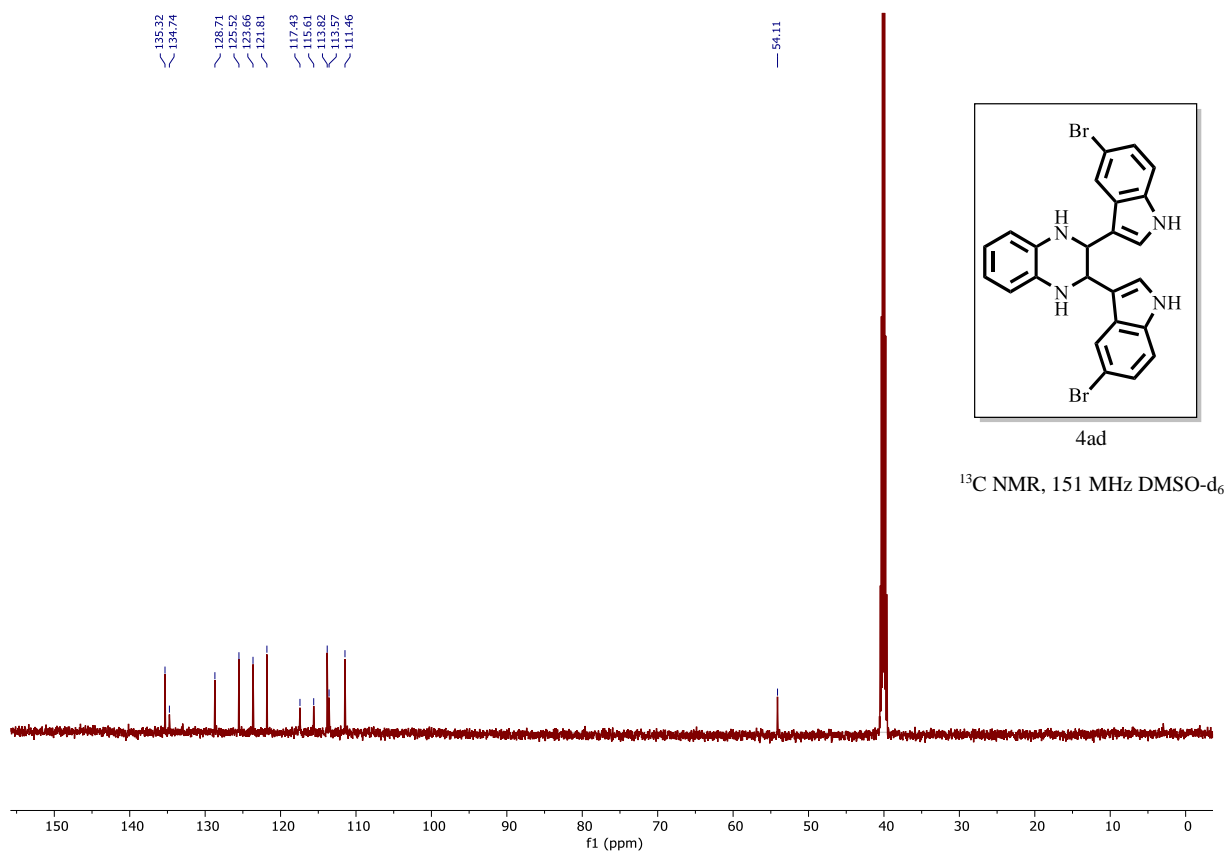

<sup>13</sup>C NMR of 4ad

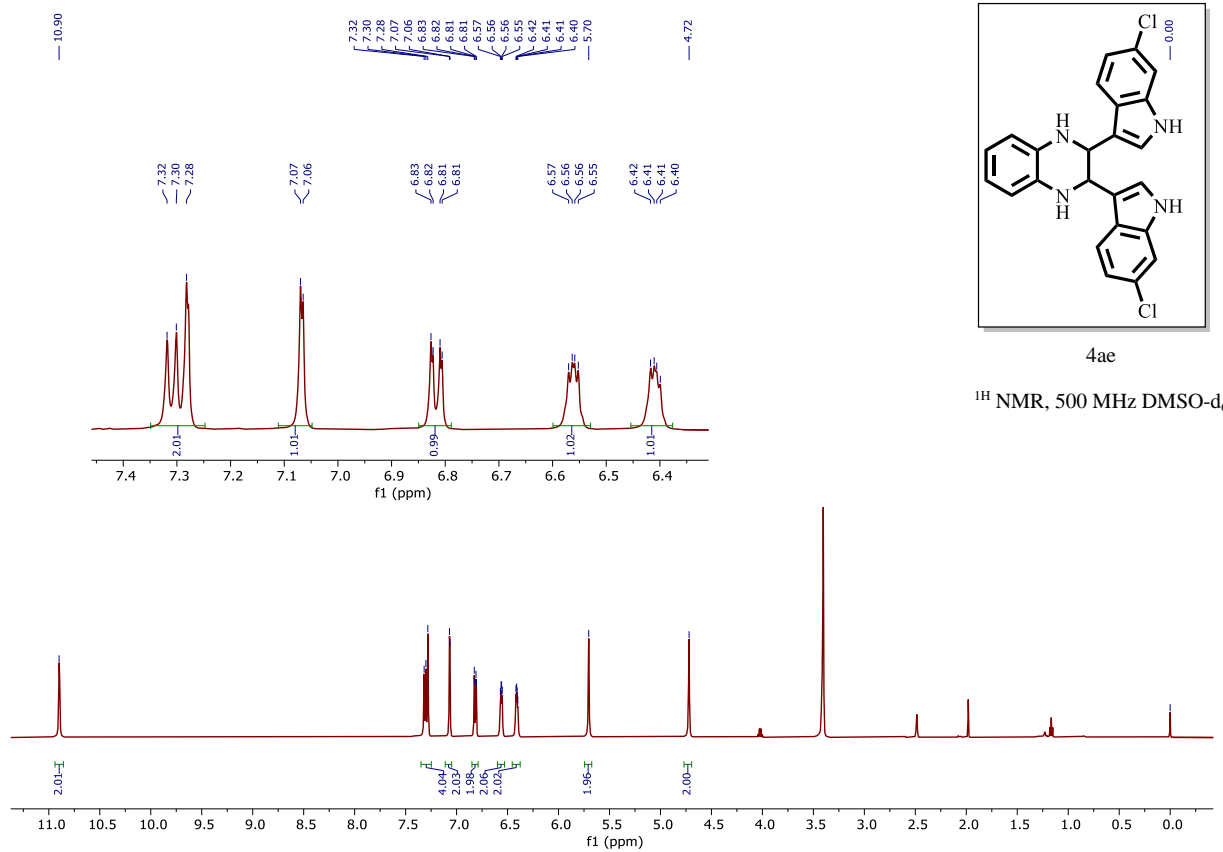

<sup>1</sup>H NMR of 4ae

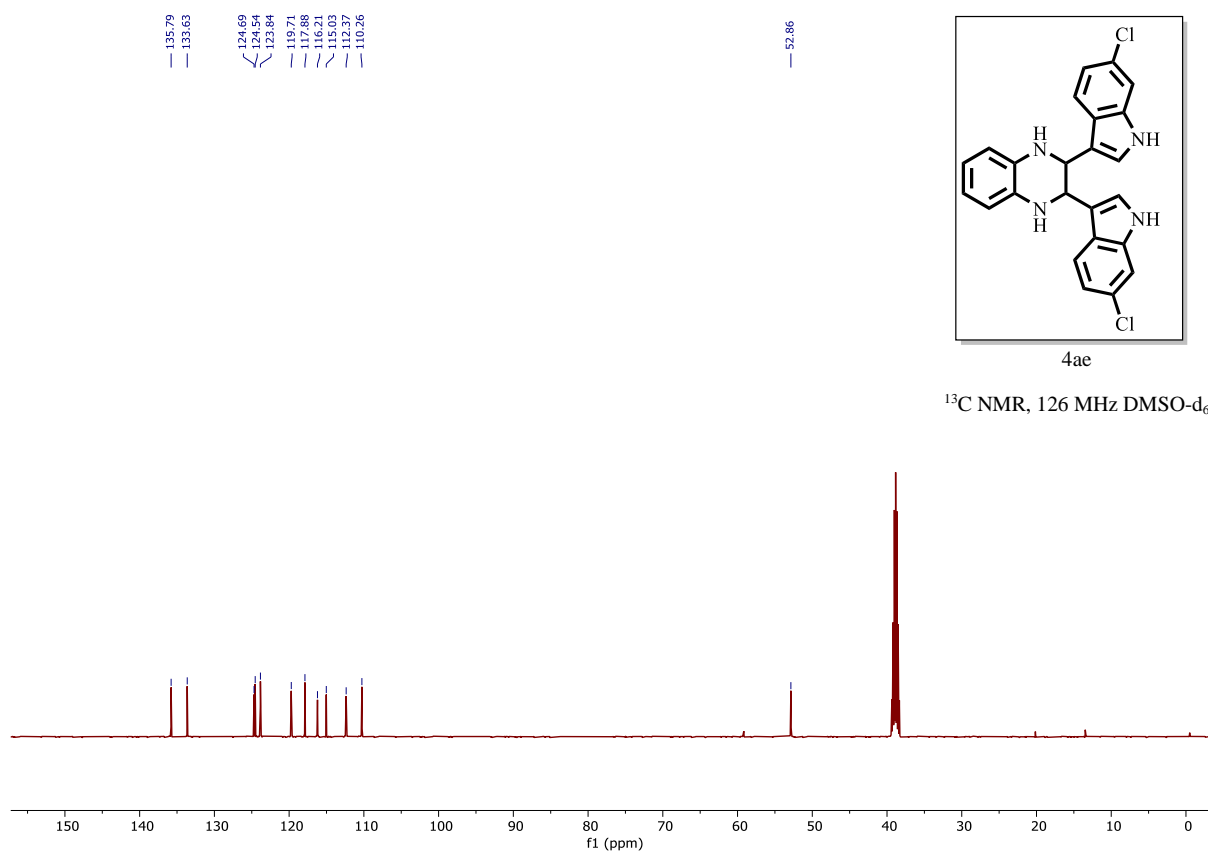

<sup>13</sup>C NMR of

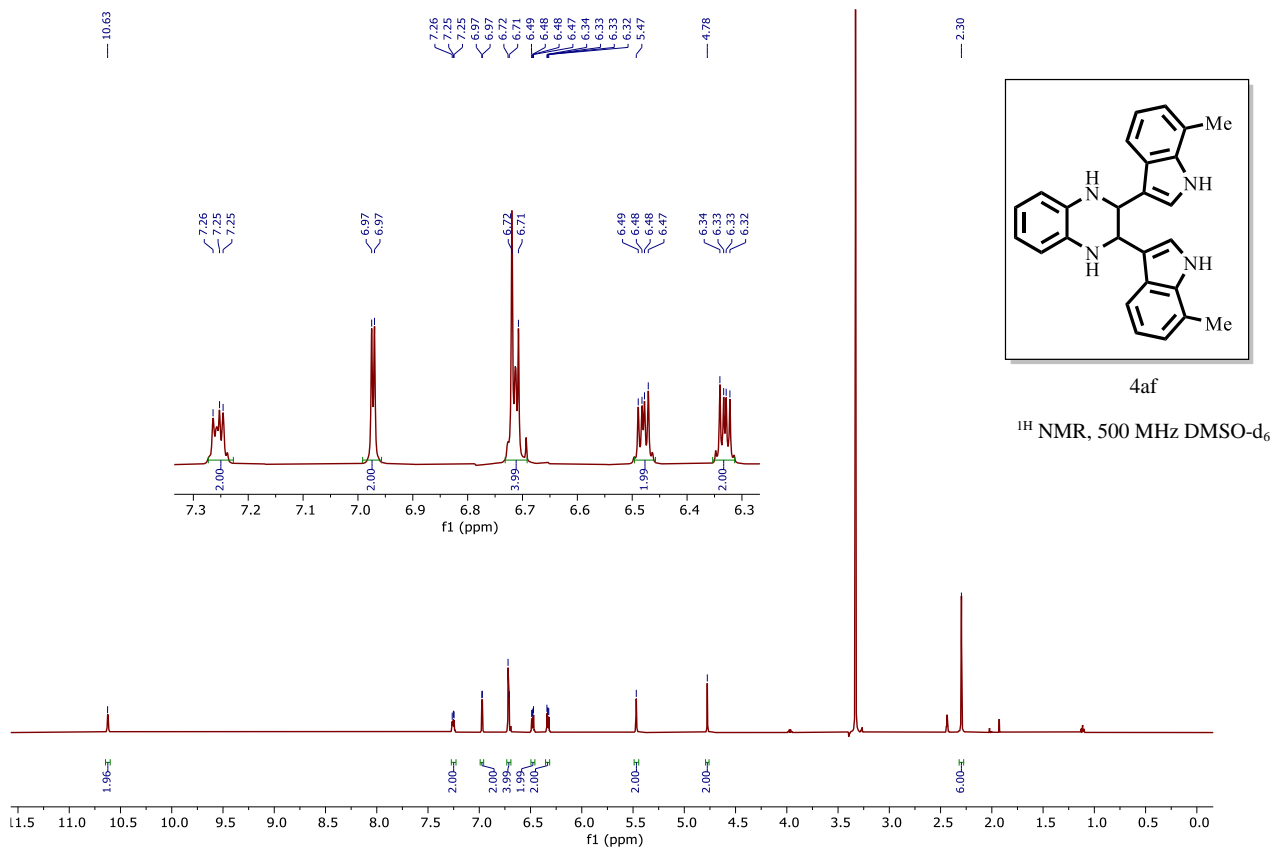

**<sup>1</sup>H NMR of 4af**

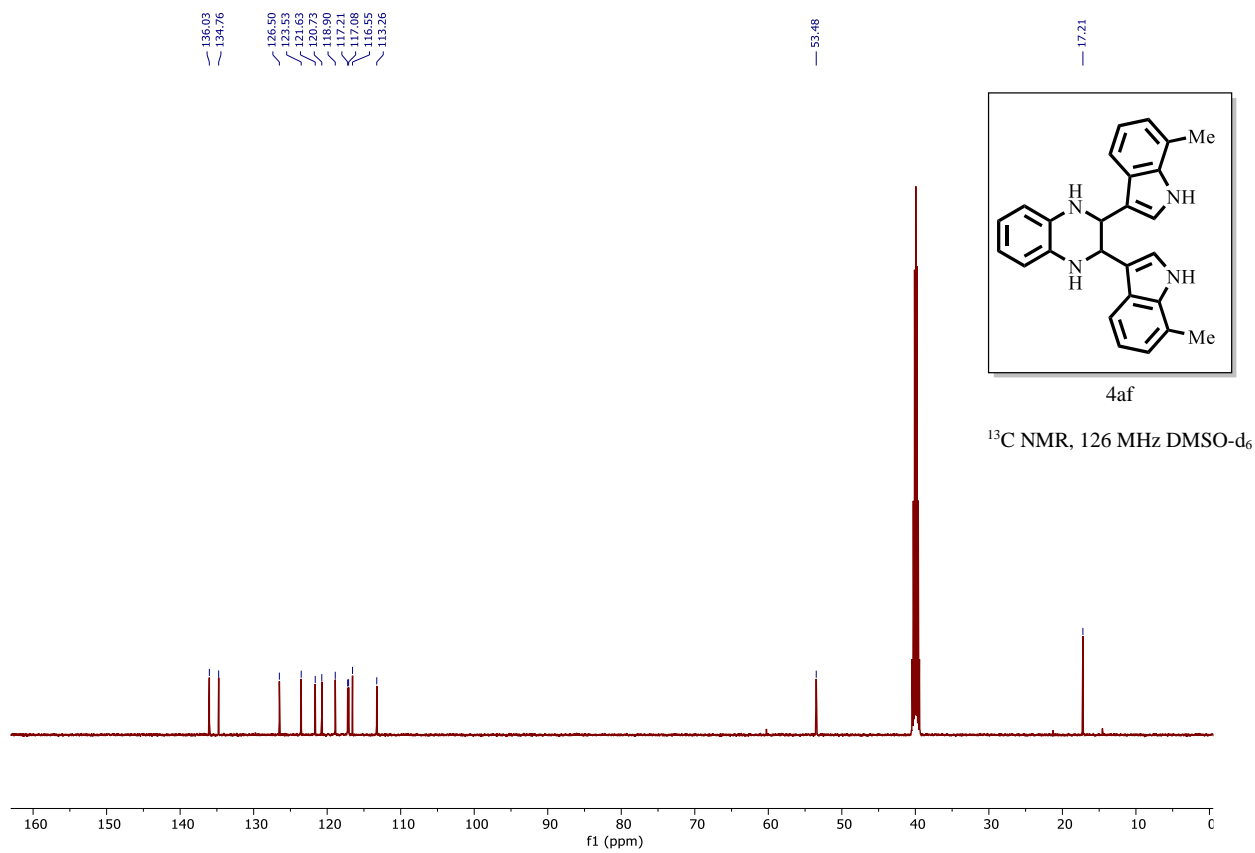

**<sup>13</sup>C NMR of 4af**

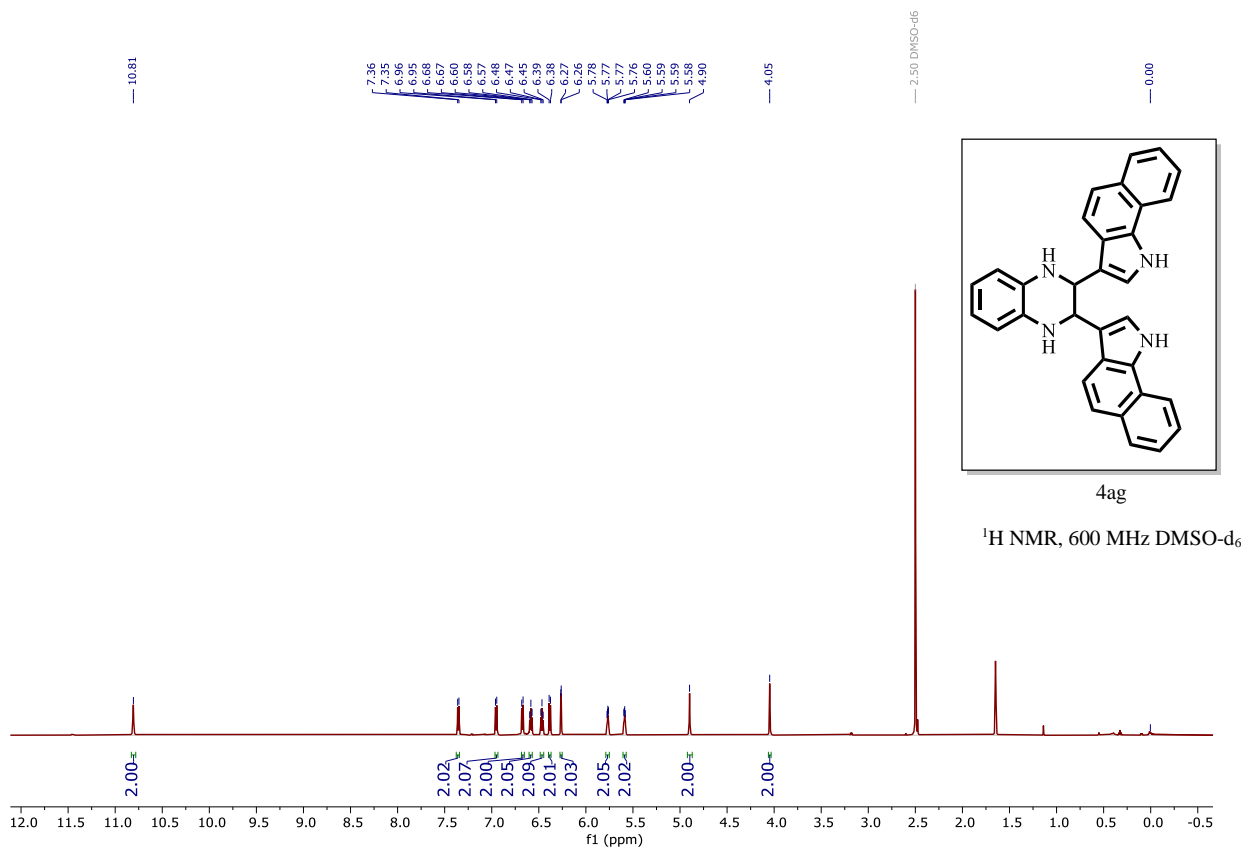

<sup>1</sup>H NMR of 4ag

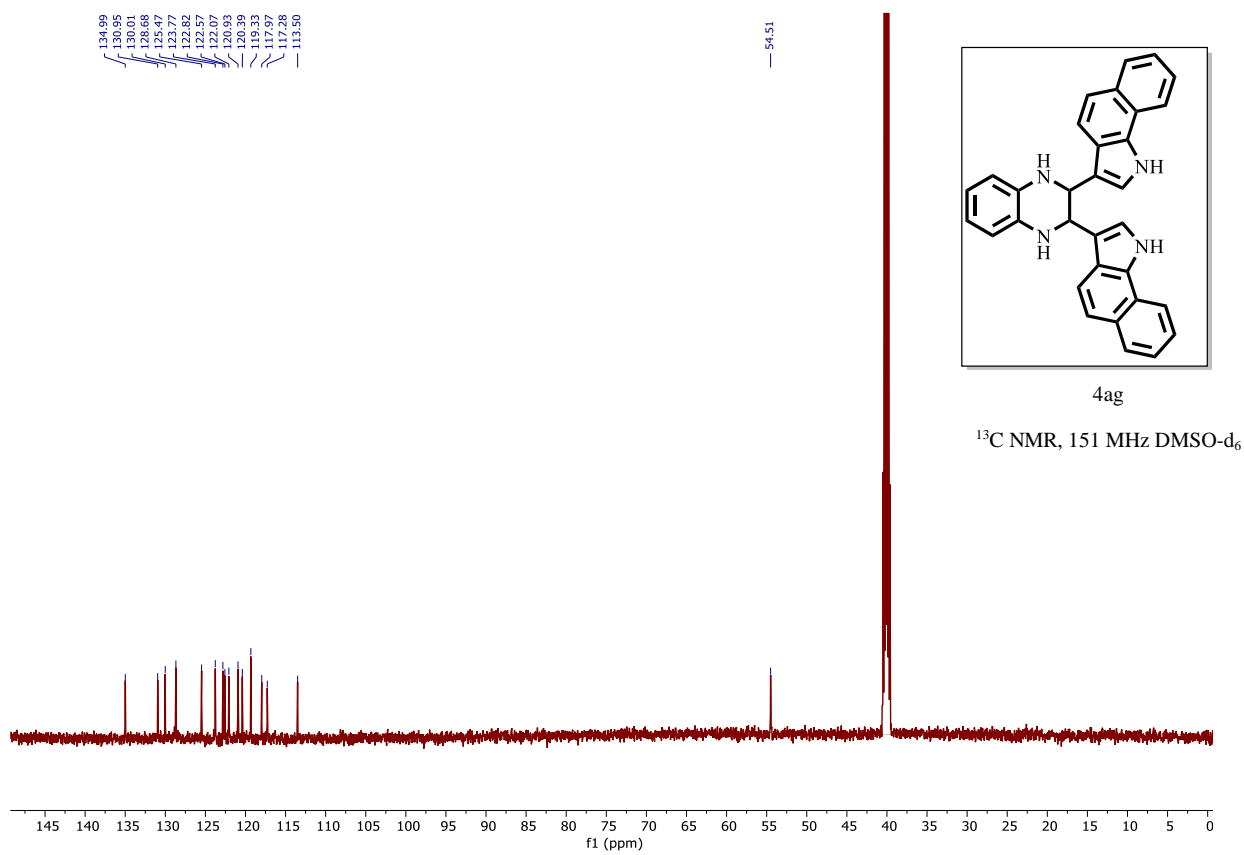

<sup>13</sup>C NMR of 4ag

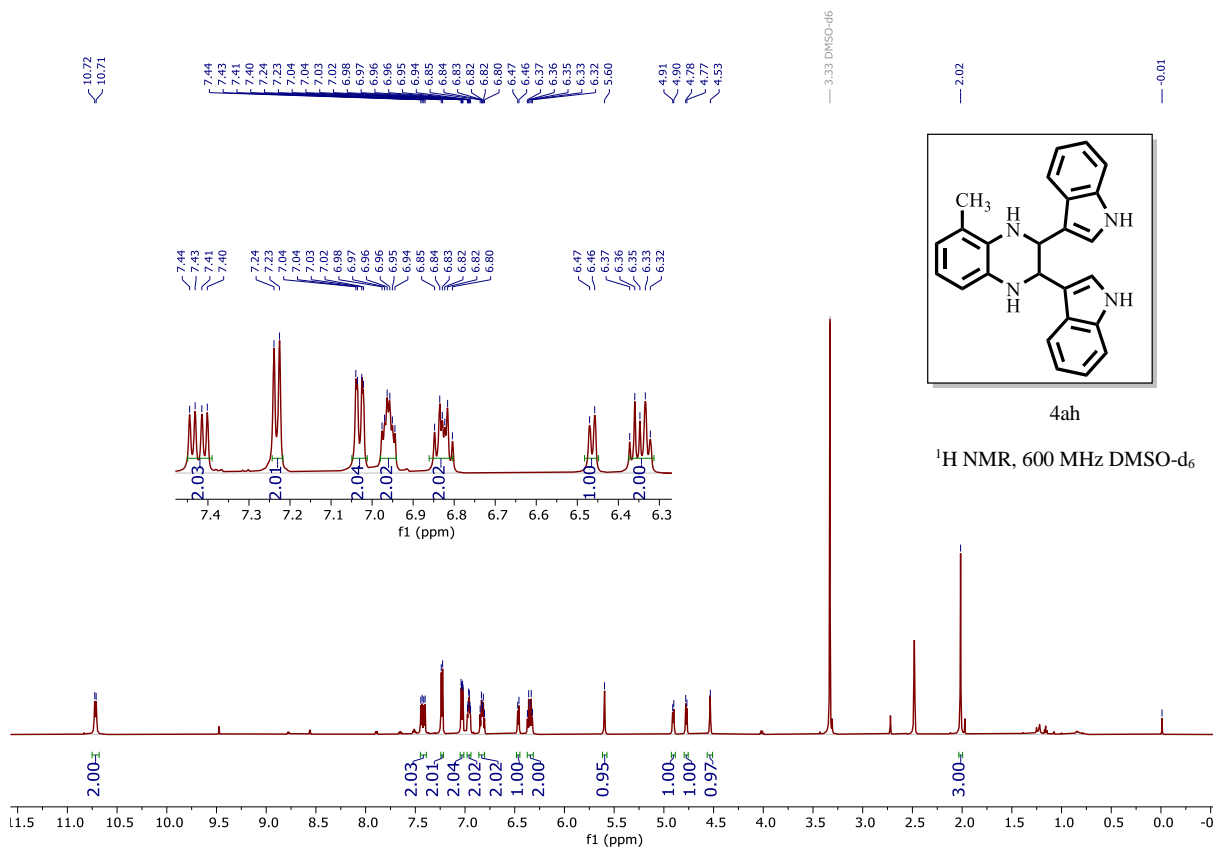

**<sup>1</sup>H NMR of 4ah**

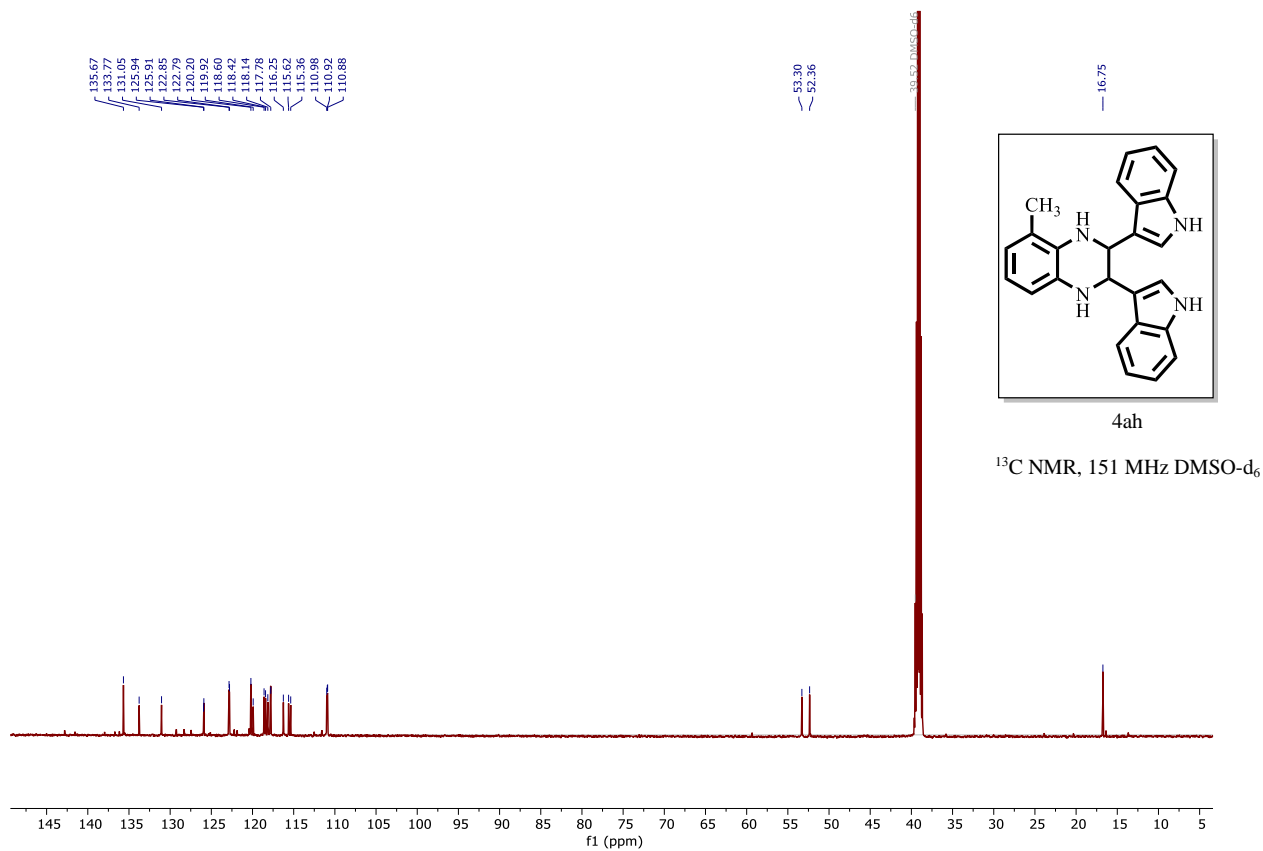

**<sup>13</sup>C NMR of 4ah**

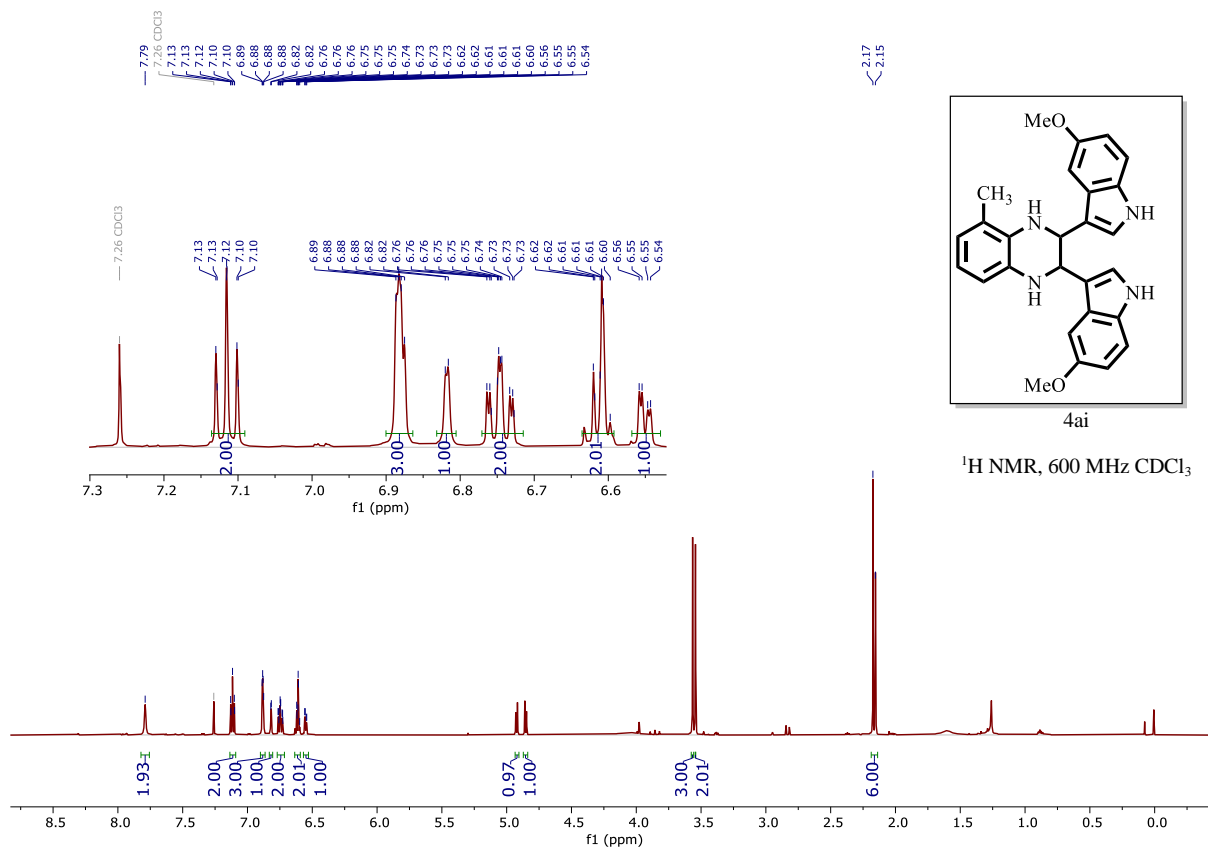

<sup>1</sup>H NMR of 4ai

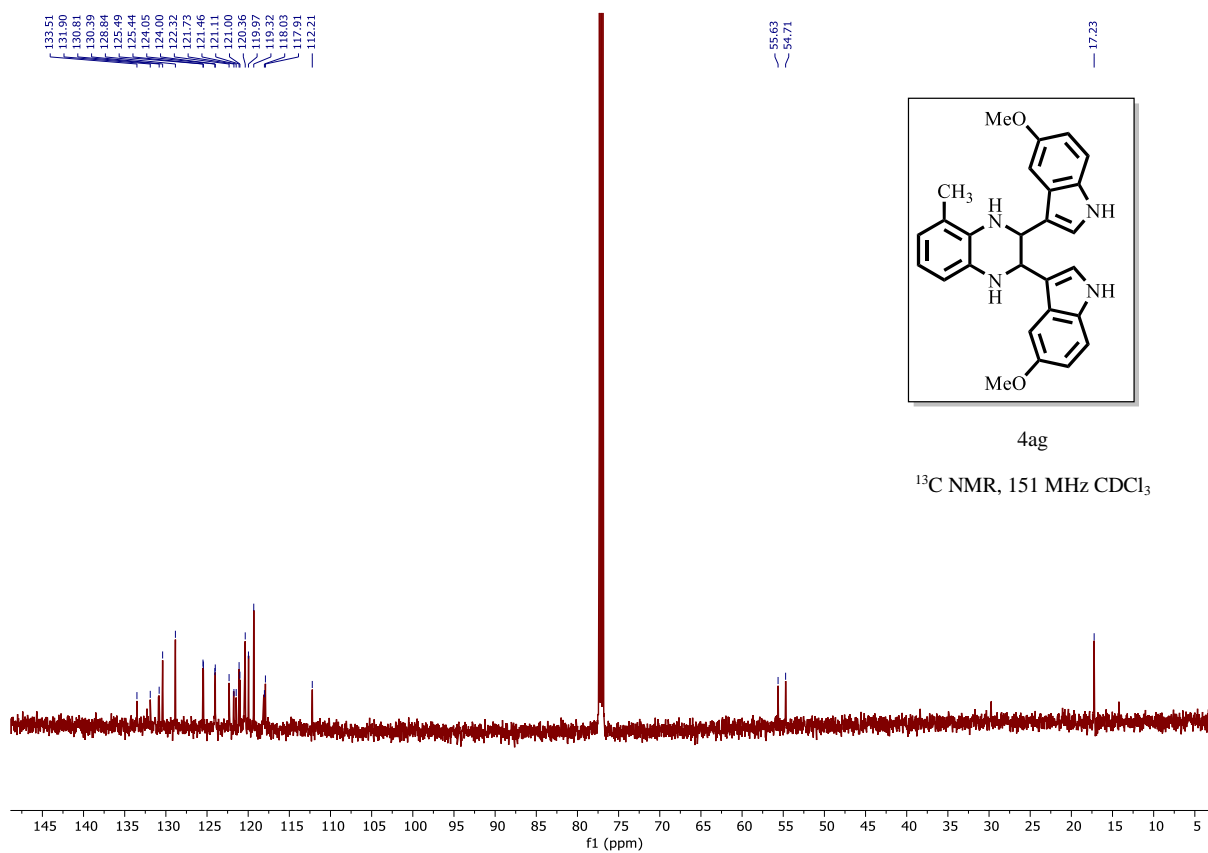

<sup>13</sup>C NMR of 4ai

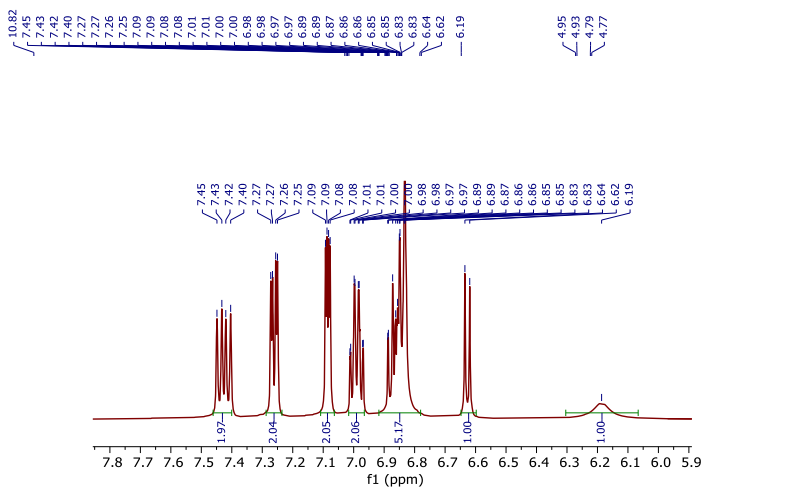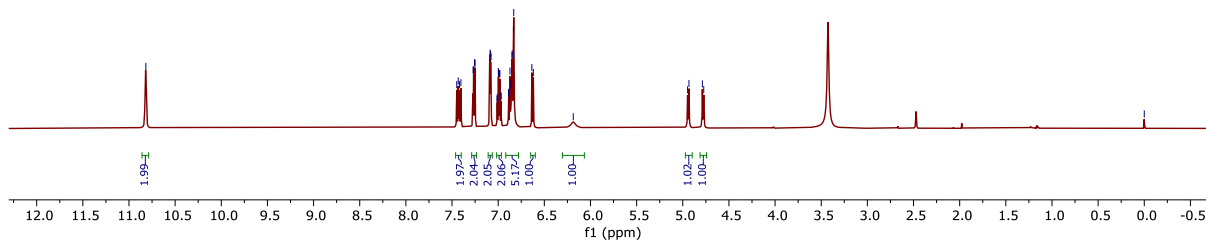

<sup>1</sup>H NMR of 4aj

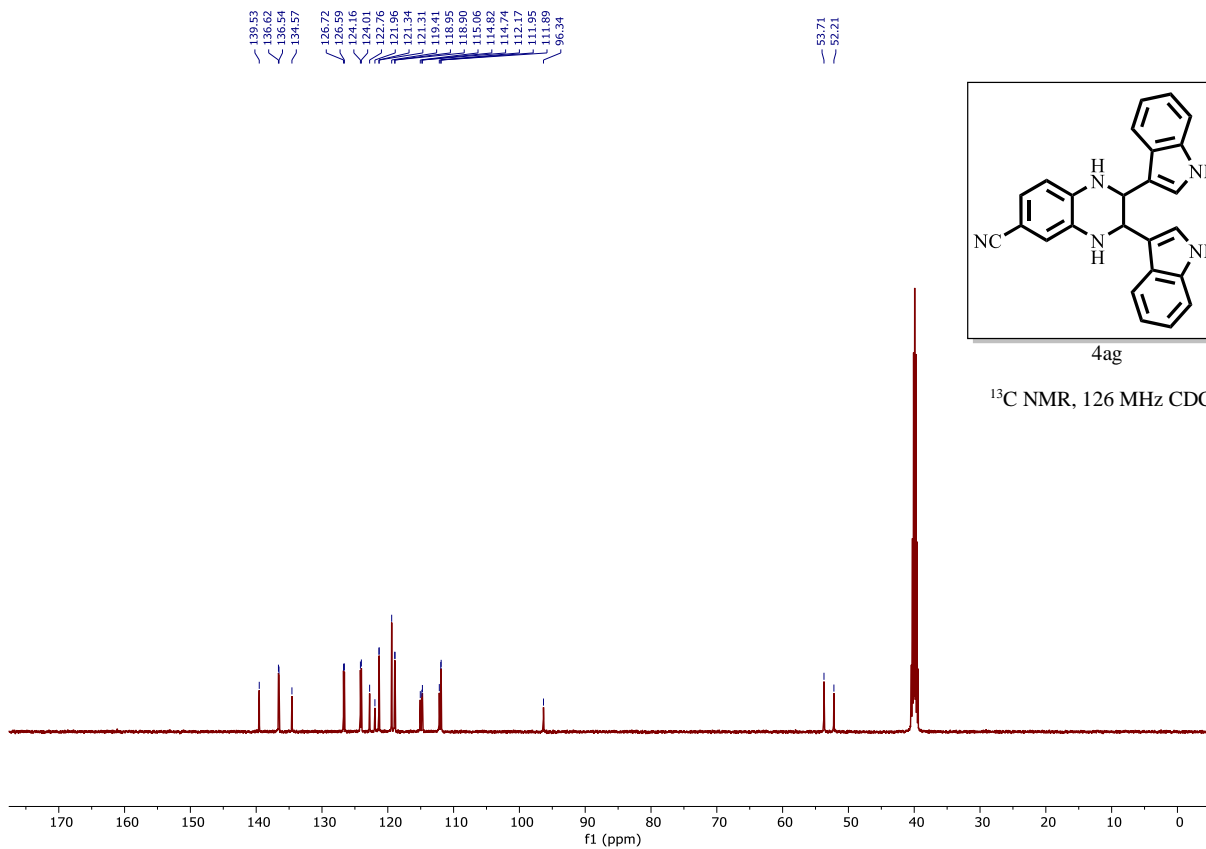

<sup>13</sup>C NMR of 4aj



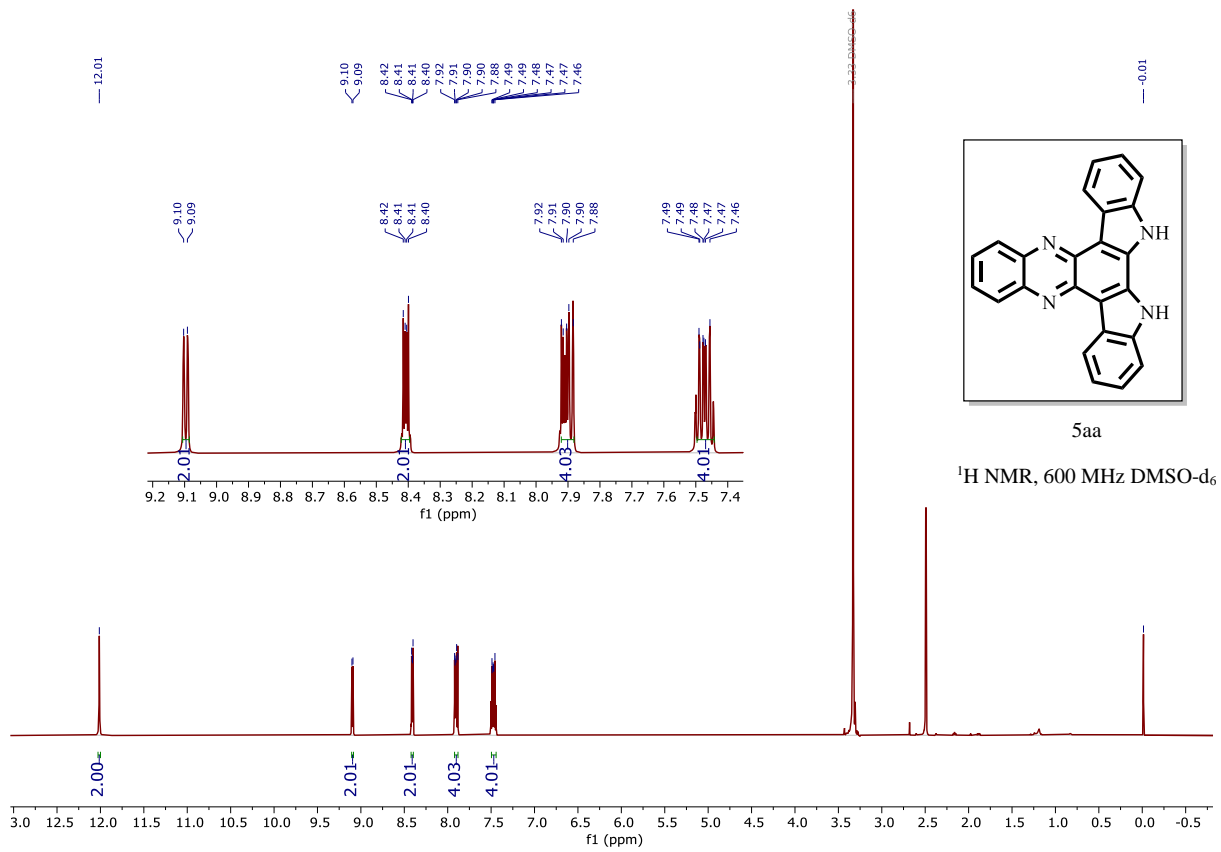

<sup>1</sup>H NMR of 5aa

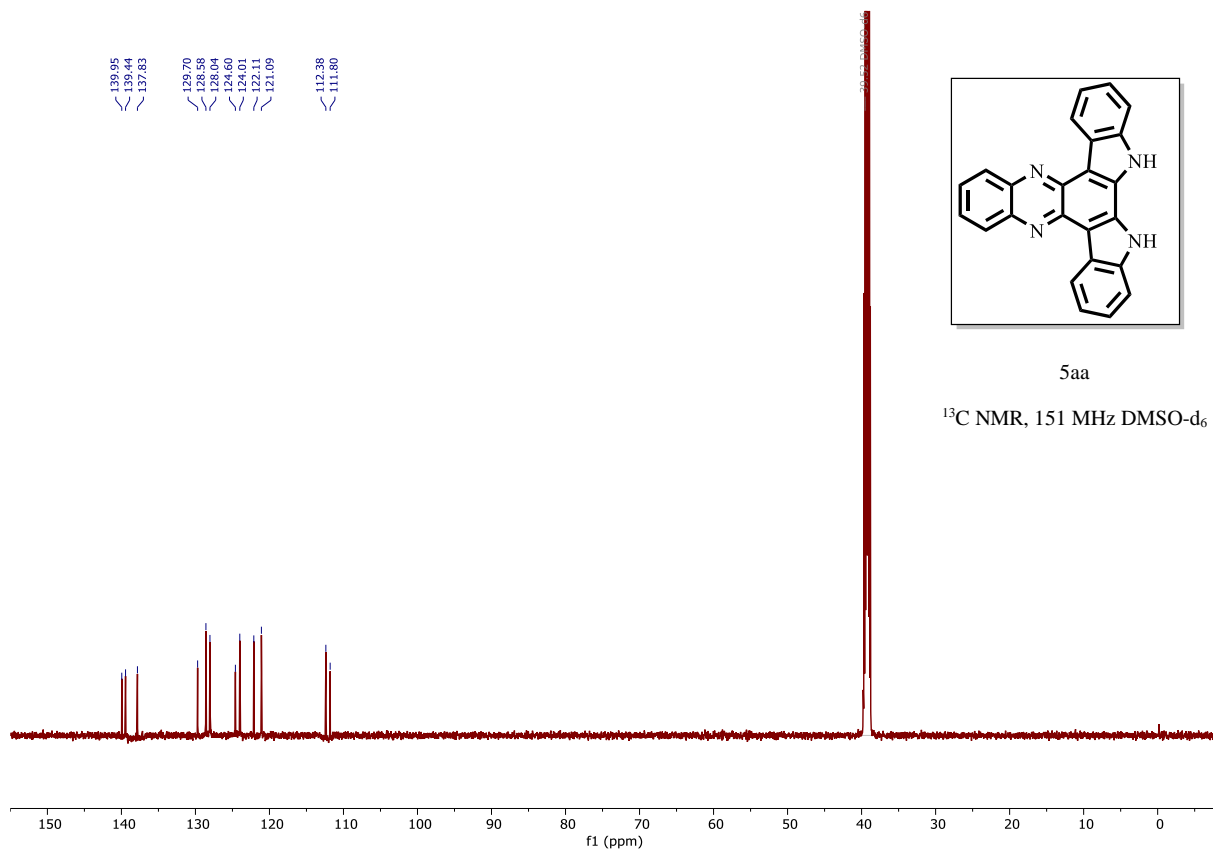

<sup>13</sup>C NMR of 5aa

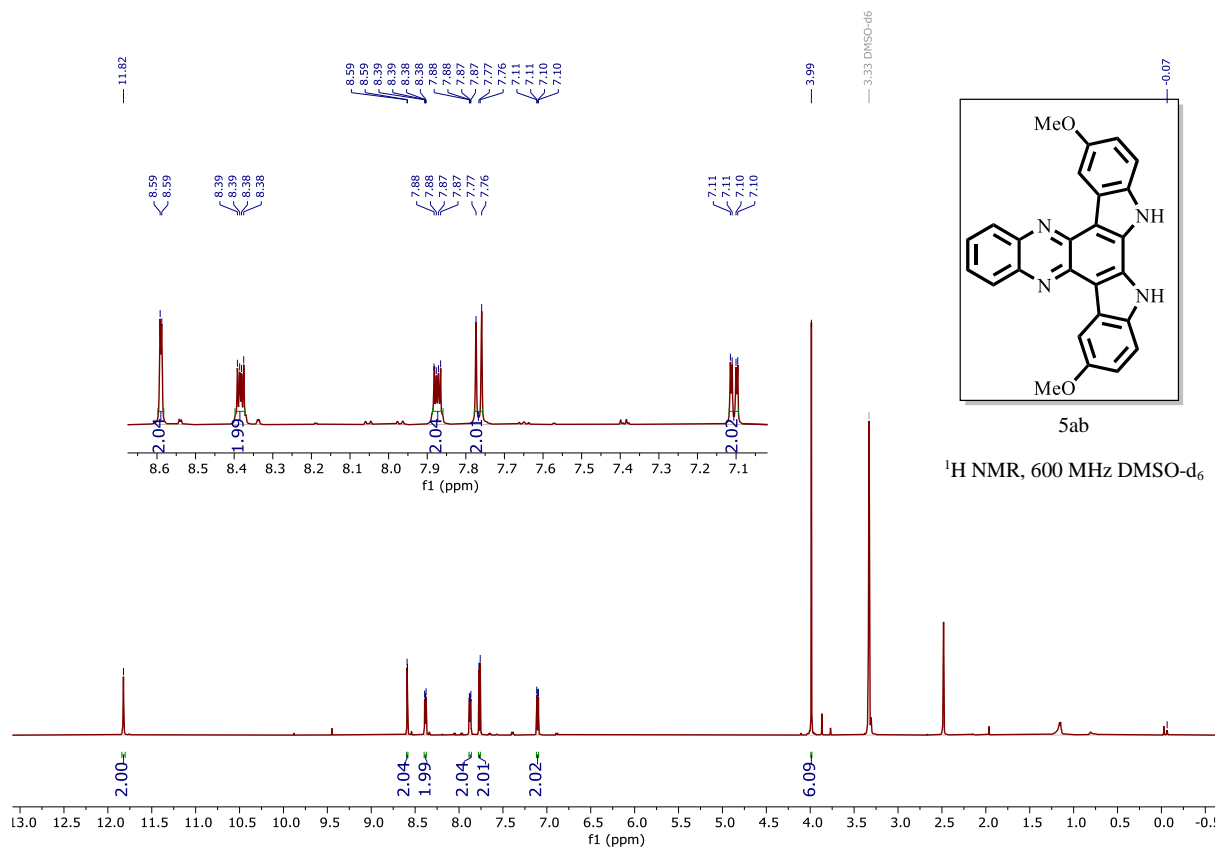

<sup>1</sup>H NMR of 5ab

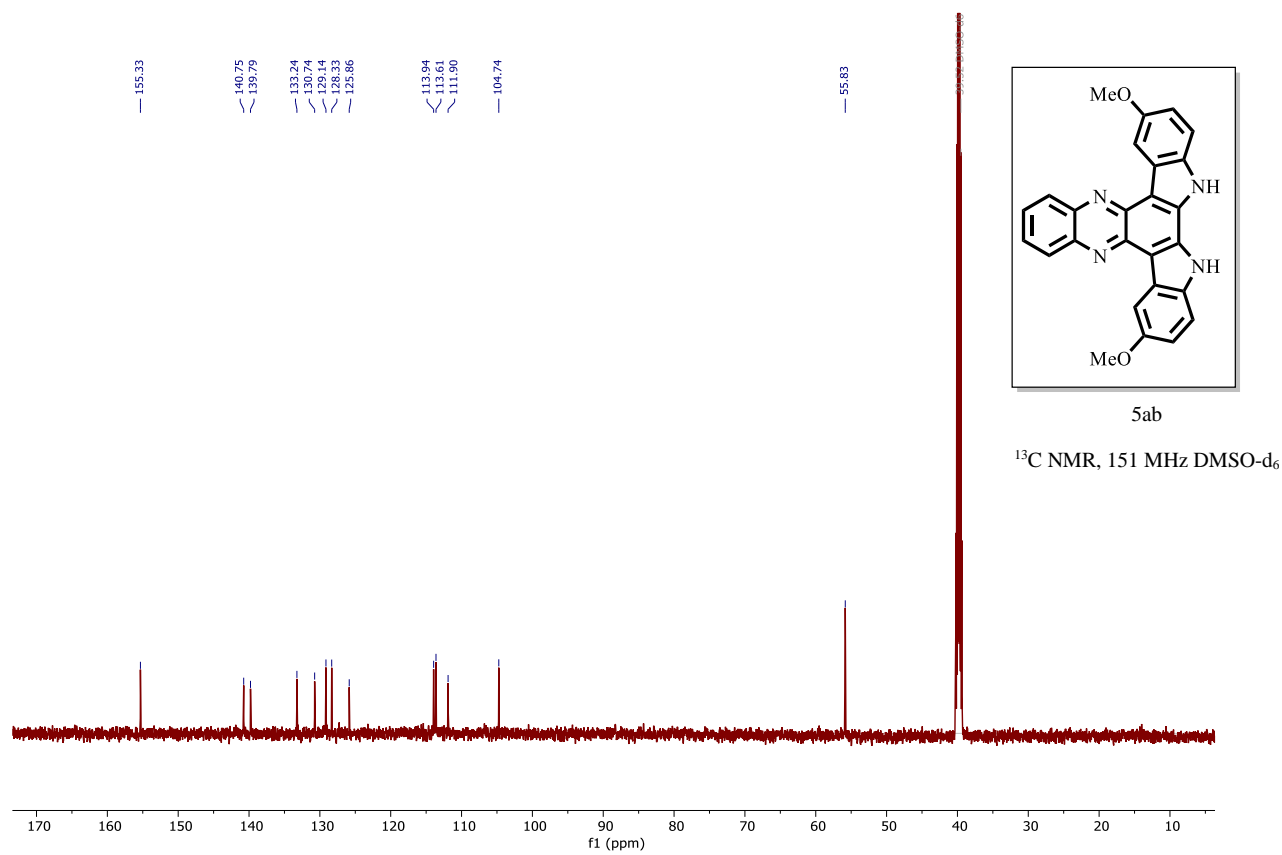

<sup>13</sup>C NMR of 5ab

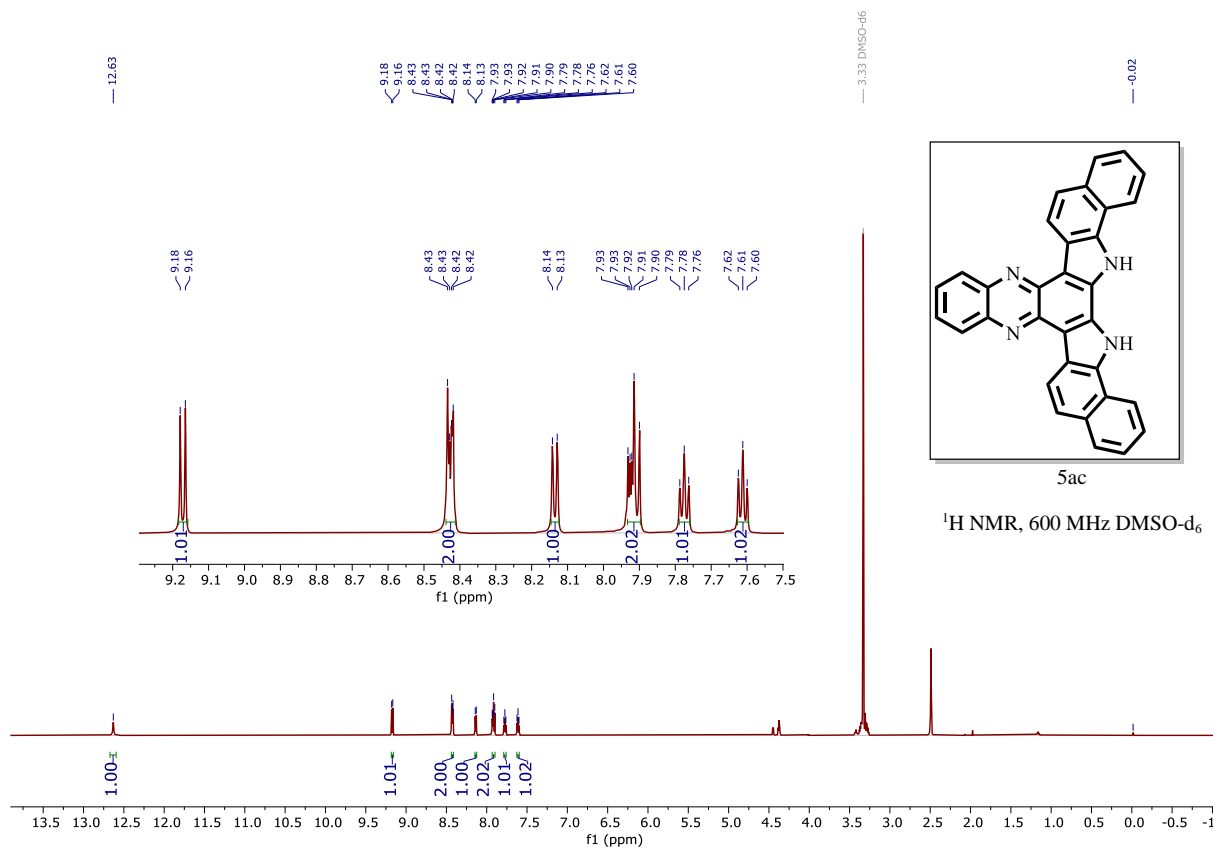

<sup>1</sup>H NMR of 5ac

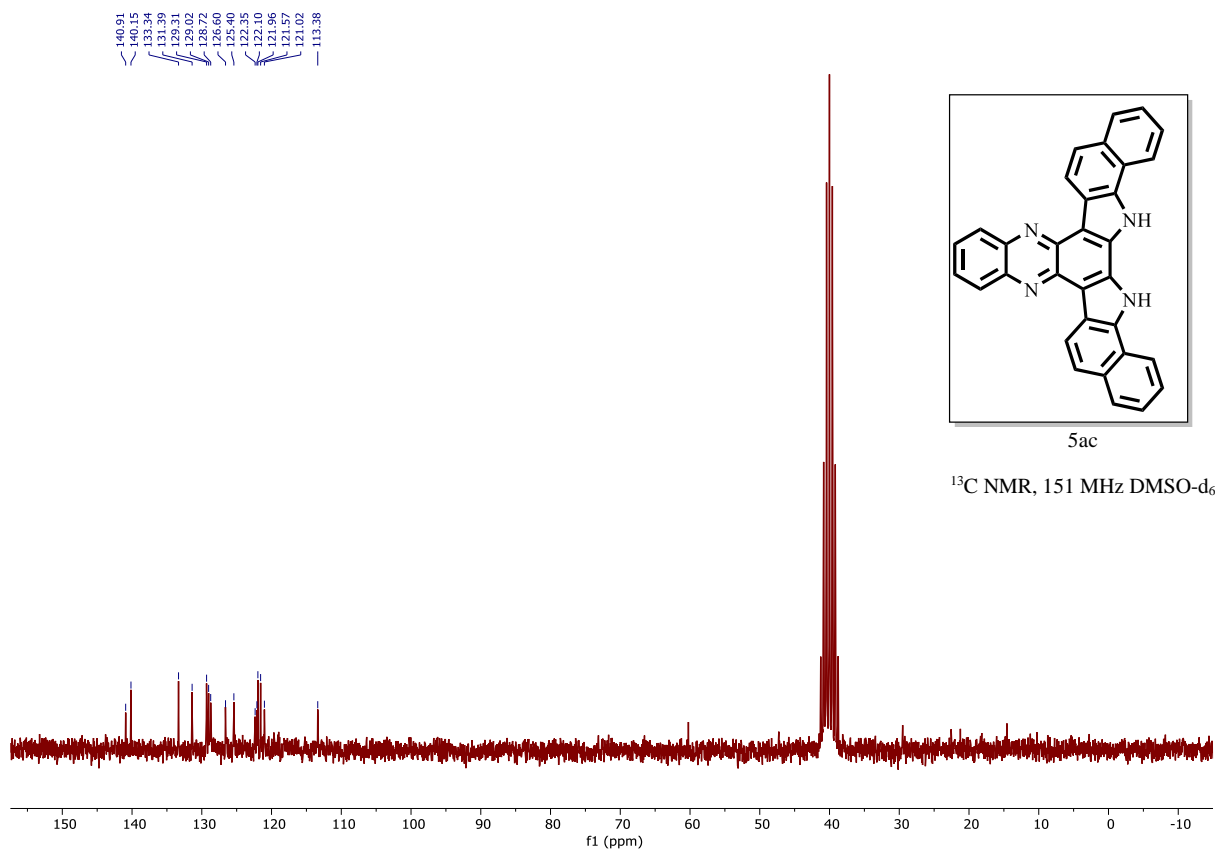

<sup>13</sup>C NMR of 5ac

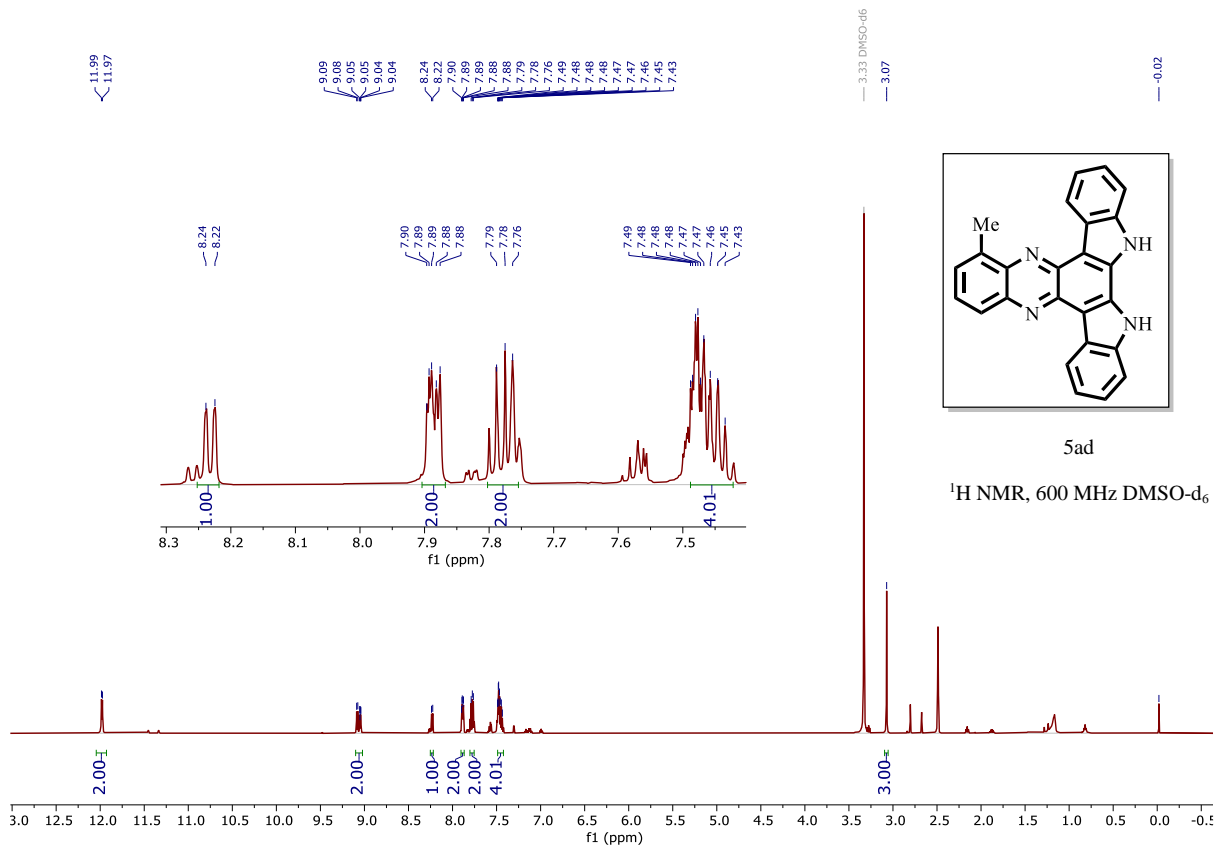

<sup>1</sup>H NMR of 5ad

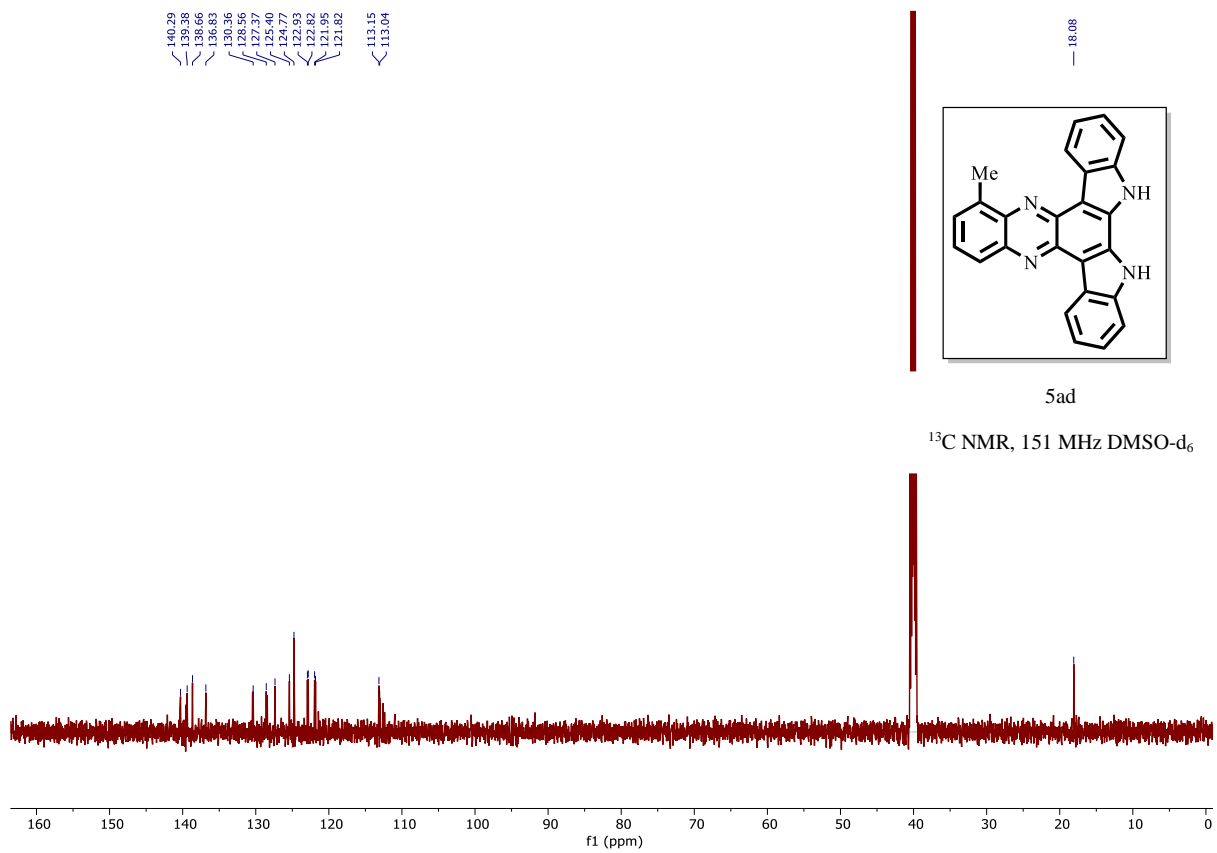

<sup>13</sup>C NMR of 5ad

## 8. References

1. Z. T. Bhutia, G. Prasannakumar, A. Das, M. Biswas, A. Chatterjee, & M. Banerjee, *ChemistrySelect.*, 2017, 2 (3), 1183–1187.
2. A. F Garrido-Castro, A. Gini, M. C. Maestro, J. Alemán, *Chem. Commun.*, 2020, **56**, 3769-3772.
3. S. Kamila, H. Ankati, E. R. Biehl, *ARKIVOC.*, 2011, (9), 94–104.
4. J. Huang, L. Wang, X.-Y. Tang, *Org. Biomol. Chem.*, 2023, **21**, 2709-2714.
5. H. C. Ni, H. Mao, Y. Huang, Y. Lu, Z. X. Liu, *Molecules.*, 2024, 29 (11), 2649.
6. (a) M. A. Alsharif., Q. A. Raja, N. A. Majeed, R. S. Jassas, A. A. Alsimaree, A., Naeem, N. Sadiq, E. U. Mughal, R. I. Alsantali, Z. Moussa, & S. A. Ahmed, (2021). *RSC Advances*, 11 (47), 29826–29858; (b) S. Mahboobi, E. Eibler, M. Koller, S. Kumar KC, and Alfred Popp *J. Org. Chem.*, 1999 Vol. **64**, No. 13, (c) J. Bergman, E. Koch, & B. Pelcman, *Perkin 1*, 2000, **16**, 2609–2614; (d) T. Wang, Y. Bai, L. Ma and X.-P. Yan, *Org. Biomol. Chem.*, 2008, **6**, 1751–1755; (e) J. L. Sessler, D.-G Cho and V. Lynch, *J. Am. Chem. Soc.*, 2006, **128**, 16518–16519.

### Note: Abbreviations

1. w. r. t. = with respect to
2. NMR = Nuclear Magnetic Resonance
3. HRMS = High Resolution Mass Spectrometry
4. CCDC = Cambridge Crystallographic Data Centre
5. *p*-TSA = *p*-Toluenesulfonic acid
6. DDQ = 2,3-Dichloro-5,6-dicyano-1,4-benzoquinone
7. *o*-DCB = 1,2-Dichlorobenzene
